# Supplementary material for: Distal CpG islands can serve as alternative promoters to transcribe genes with silenced proximal promoters
Source: PubMed Central journal article supplement — Genome Res. 2017 Apr;27(4):553–66. doi: 10.1101/gr.212050.116 (PMC5378174; doi:10.1101/gr.212050.116), 2017-04
Supplement: supp_gr.212050.116_Supplemental_Fig_S1.pdf [file supp_gr.212050.116_Supplemental_Fig_S1.pdf]

TSI ( $\tau$ )

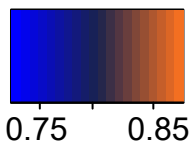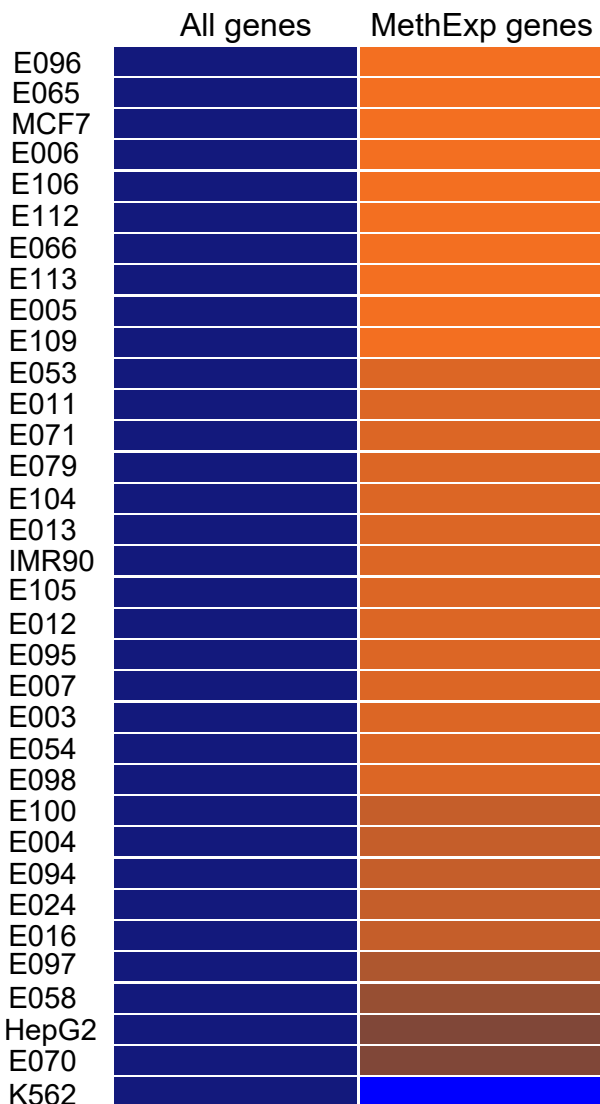

**Supplemental Figure 1.** Heatmap representation of the median tissue specificity index (TSI) of MethExp genes versus all genes (columns) across 34 tissues (rows). A color scale for TSI values is provided above the heatmap.
