# Supplementary material for: Distal CpG islands can serve as alternative promoters to transcribe genes with silenced proximal promoters
Source: PubMed Central journal article supplement — Genome Res. 2017 Apr;27(4):553–66. doi: 10.1101/gr.212050.116 (PMC5378174; doi:10.1101/gr.212050.116), 2017-04
Supplement: supp_gr.212050.116_Supplemental_Fig_S2a.pdf [file supp_gr.212050.116_Supplemental_Fig_S2a.pdf]

**Gene Subtype** long\_noncoding protein\_coding short\_noncoding

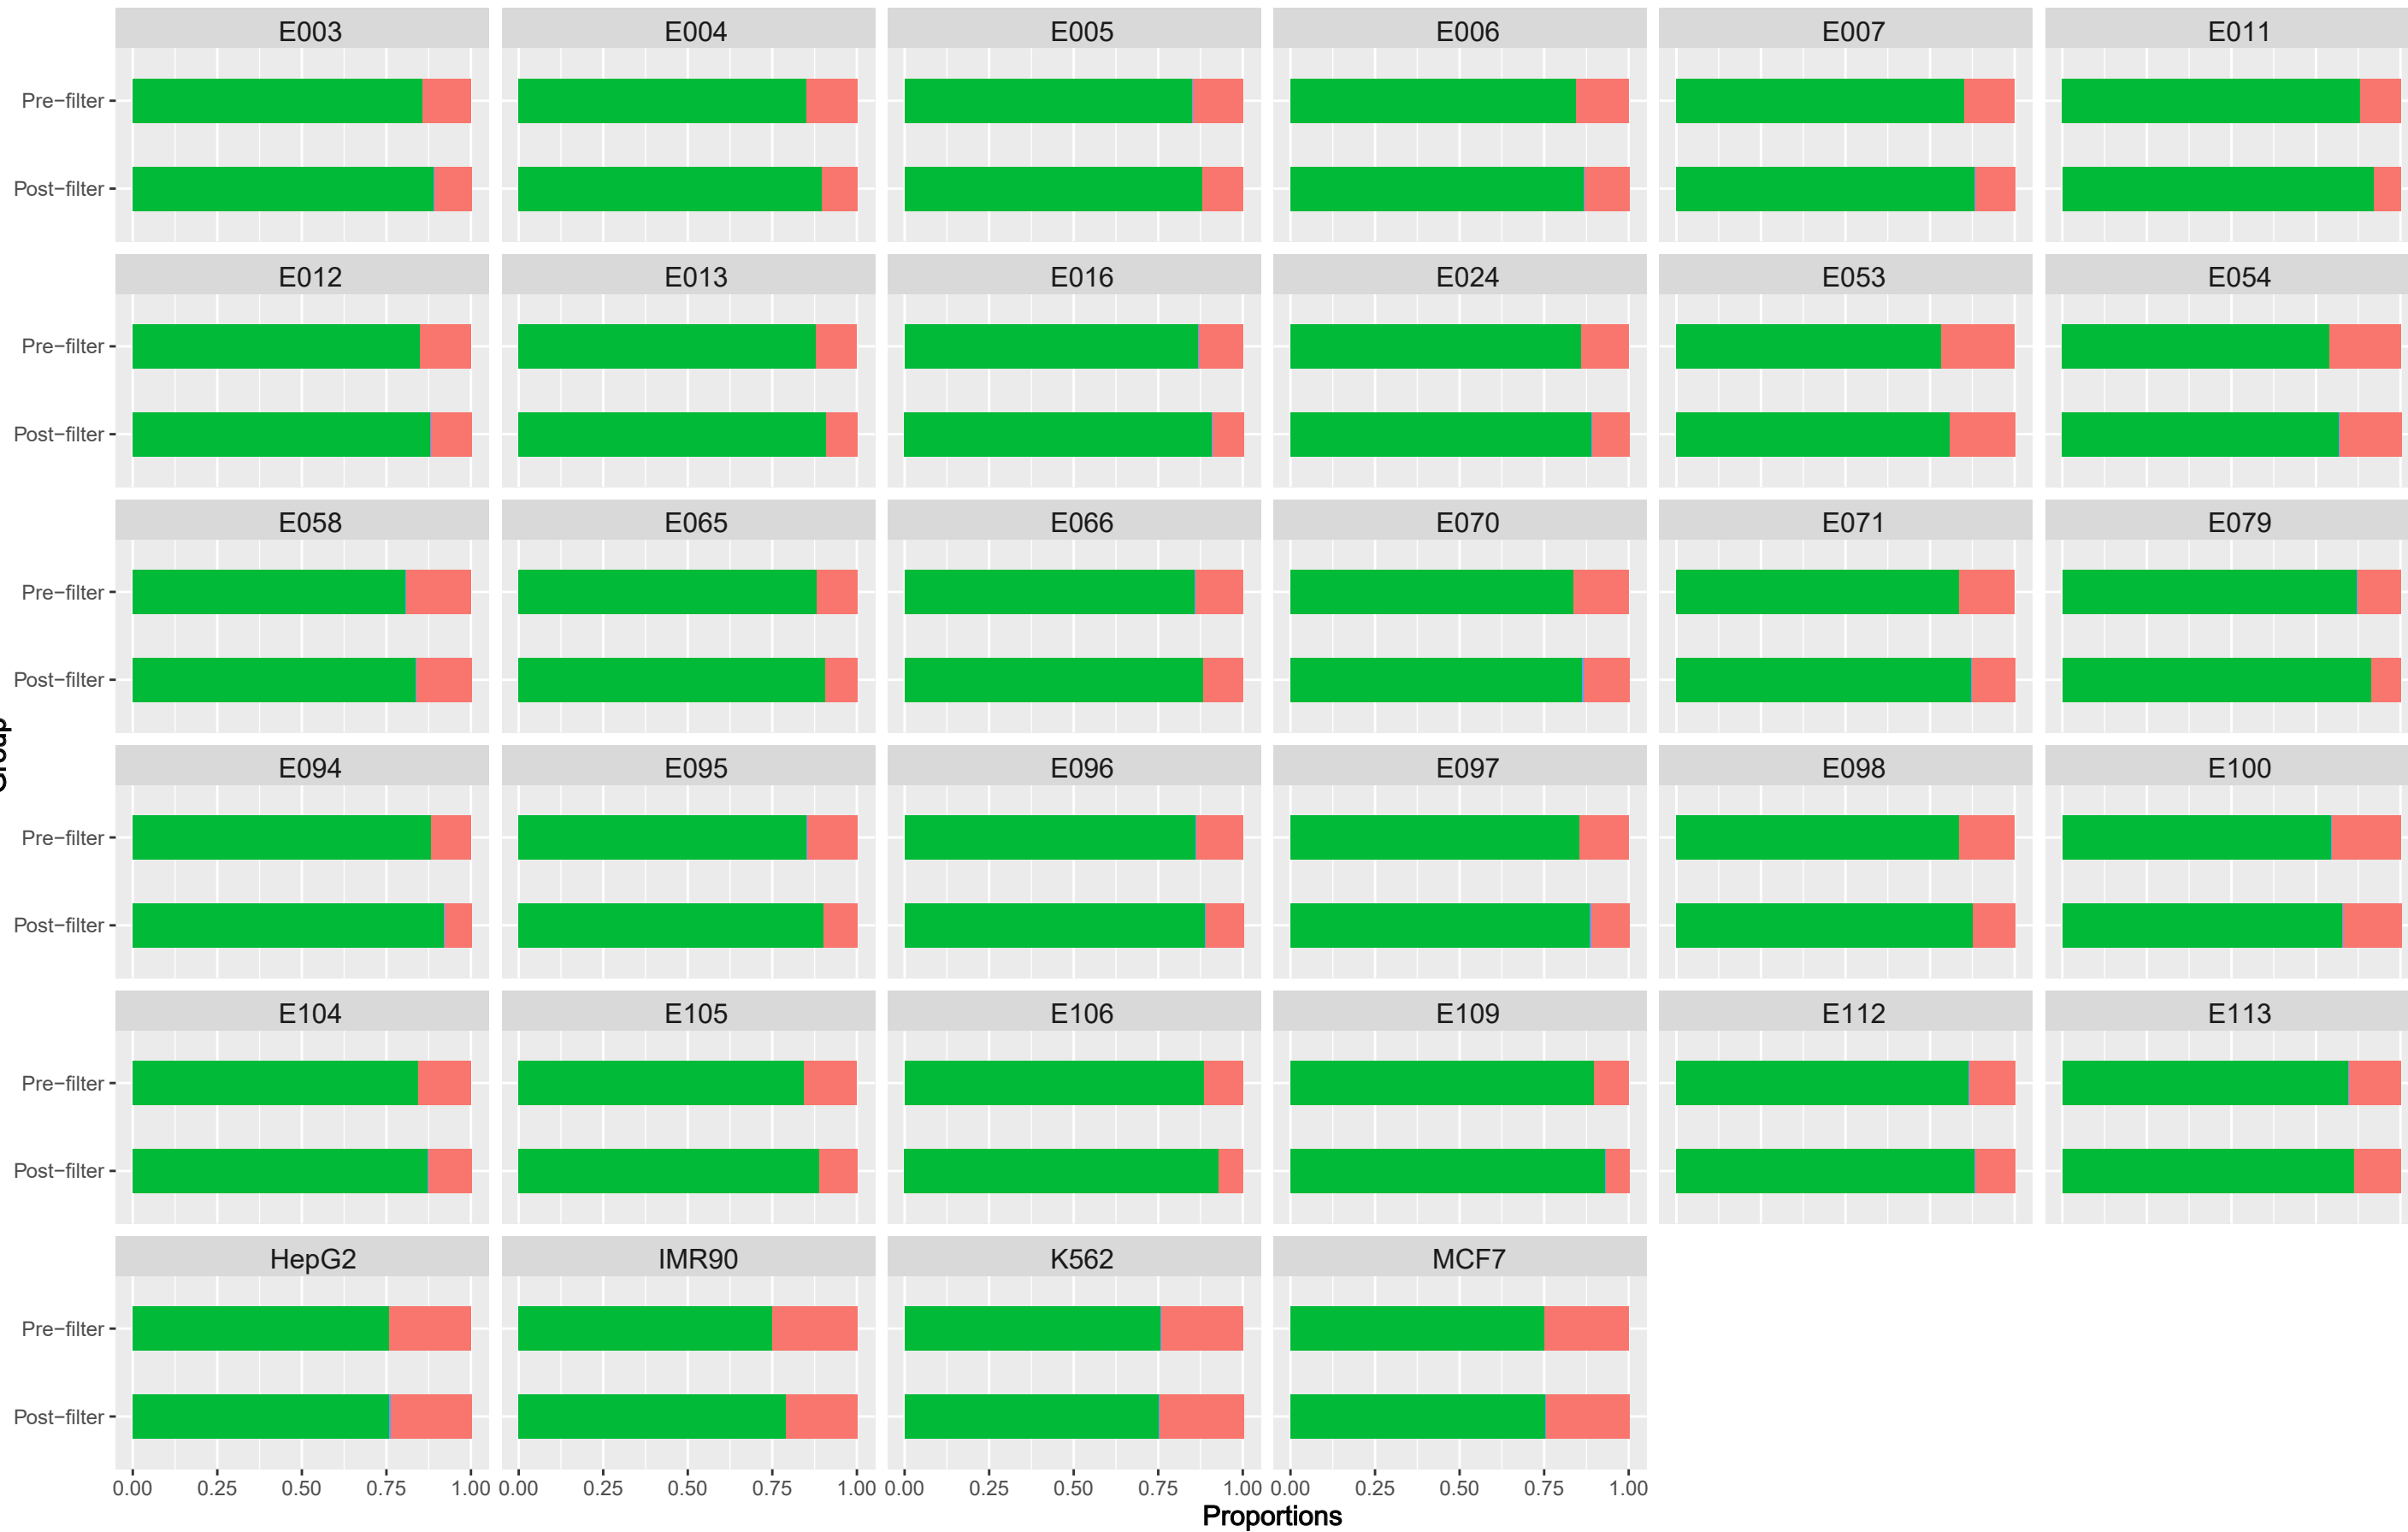

**Supplemental Figure 2a.** Stacked barplots displaying the proportion (X-axes) of three gene subtypes, viz., protein-coding (green), long-noncoding (pink), and short-noncoding (blue) before and after applying a filtration step (Y-axes) to MethExp genes, that discards all loci that contain a neighboring gene spanning the region between them and their associated upstream CGIs. Application of the filter resulted in no differences in the proportions of these gene subtypes across all 34 tissue types.
