# Supplementary material for: Distal CpG islands can serve as alternative promoters to transcribe genes with silenced proximal promoters
Source: PubMed Central journal article supplement — Genome Res. 2017 Apr;27(4):553–66. doi: 10.1101/gr.212050.116 (PMC5378174; doi:10.1101/gr.212050.116), 2017-04
Supplement: supp_gr.212050.116_Supplemental_Fig_S2b.pdf [file supp_gr.212050.116_Supplemental_Fig_S2b.pdf]

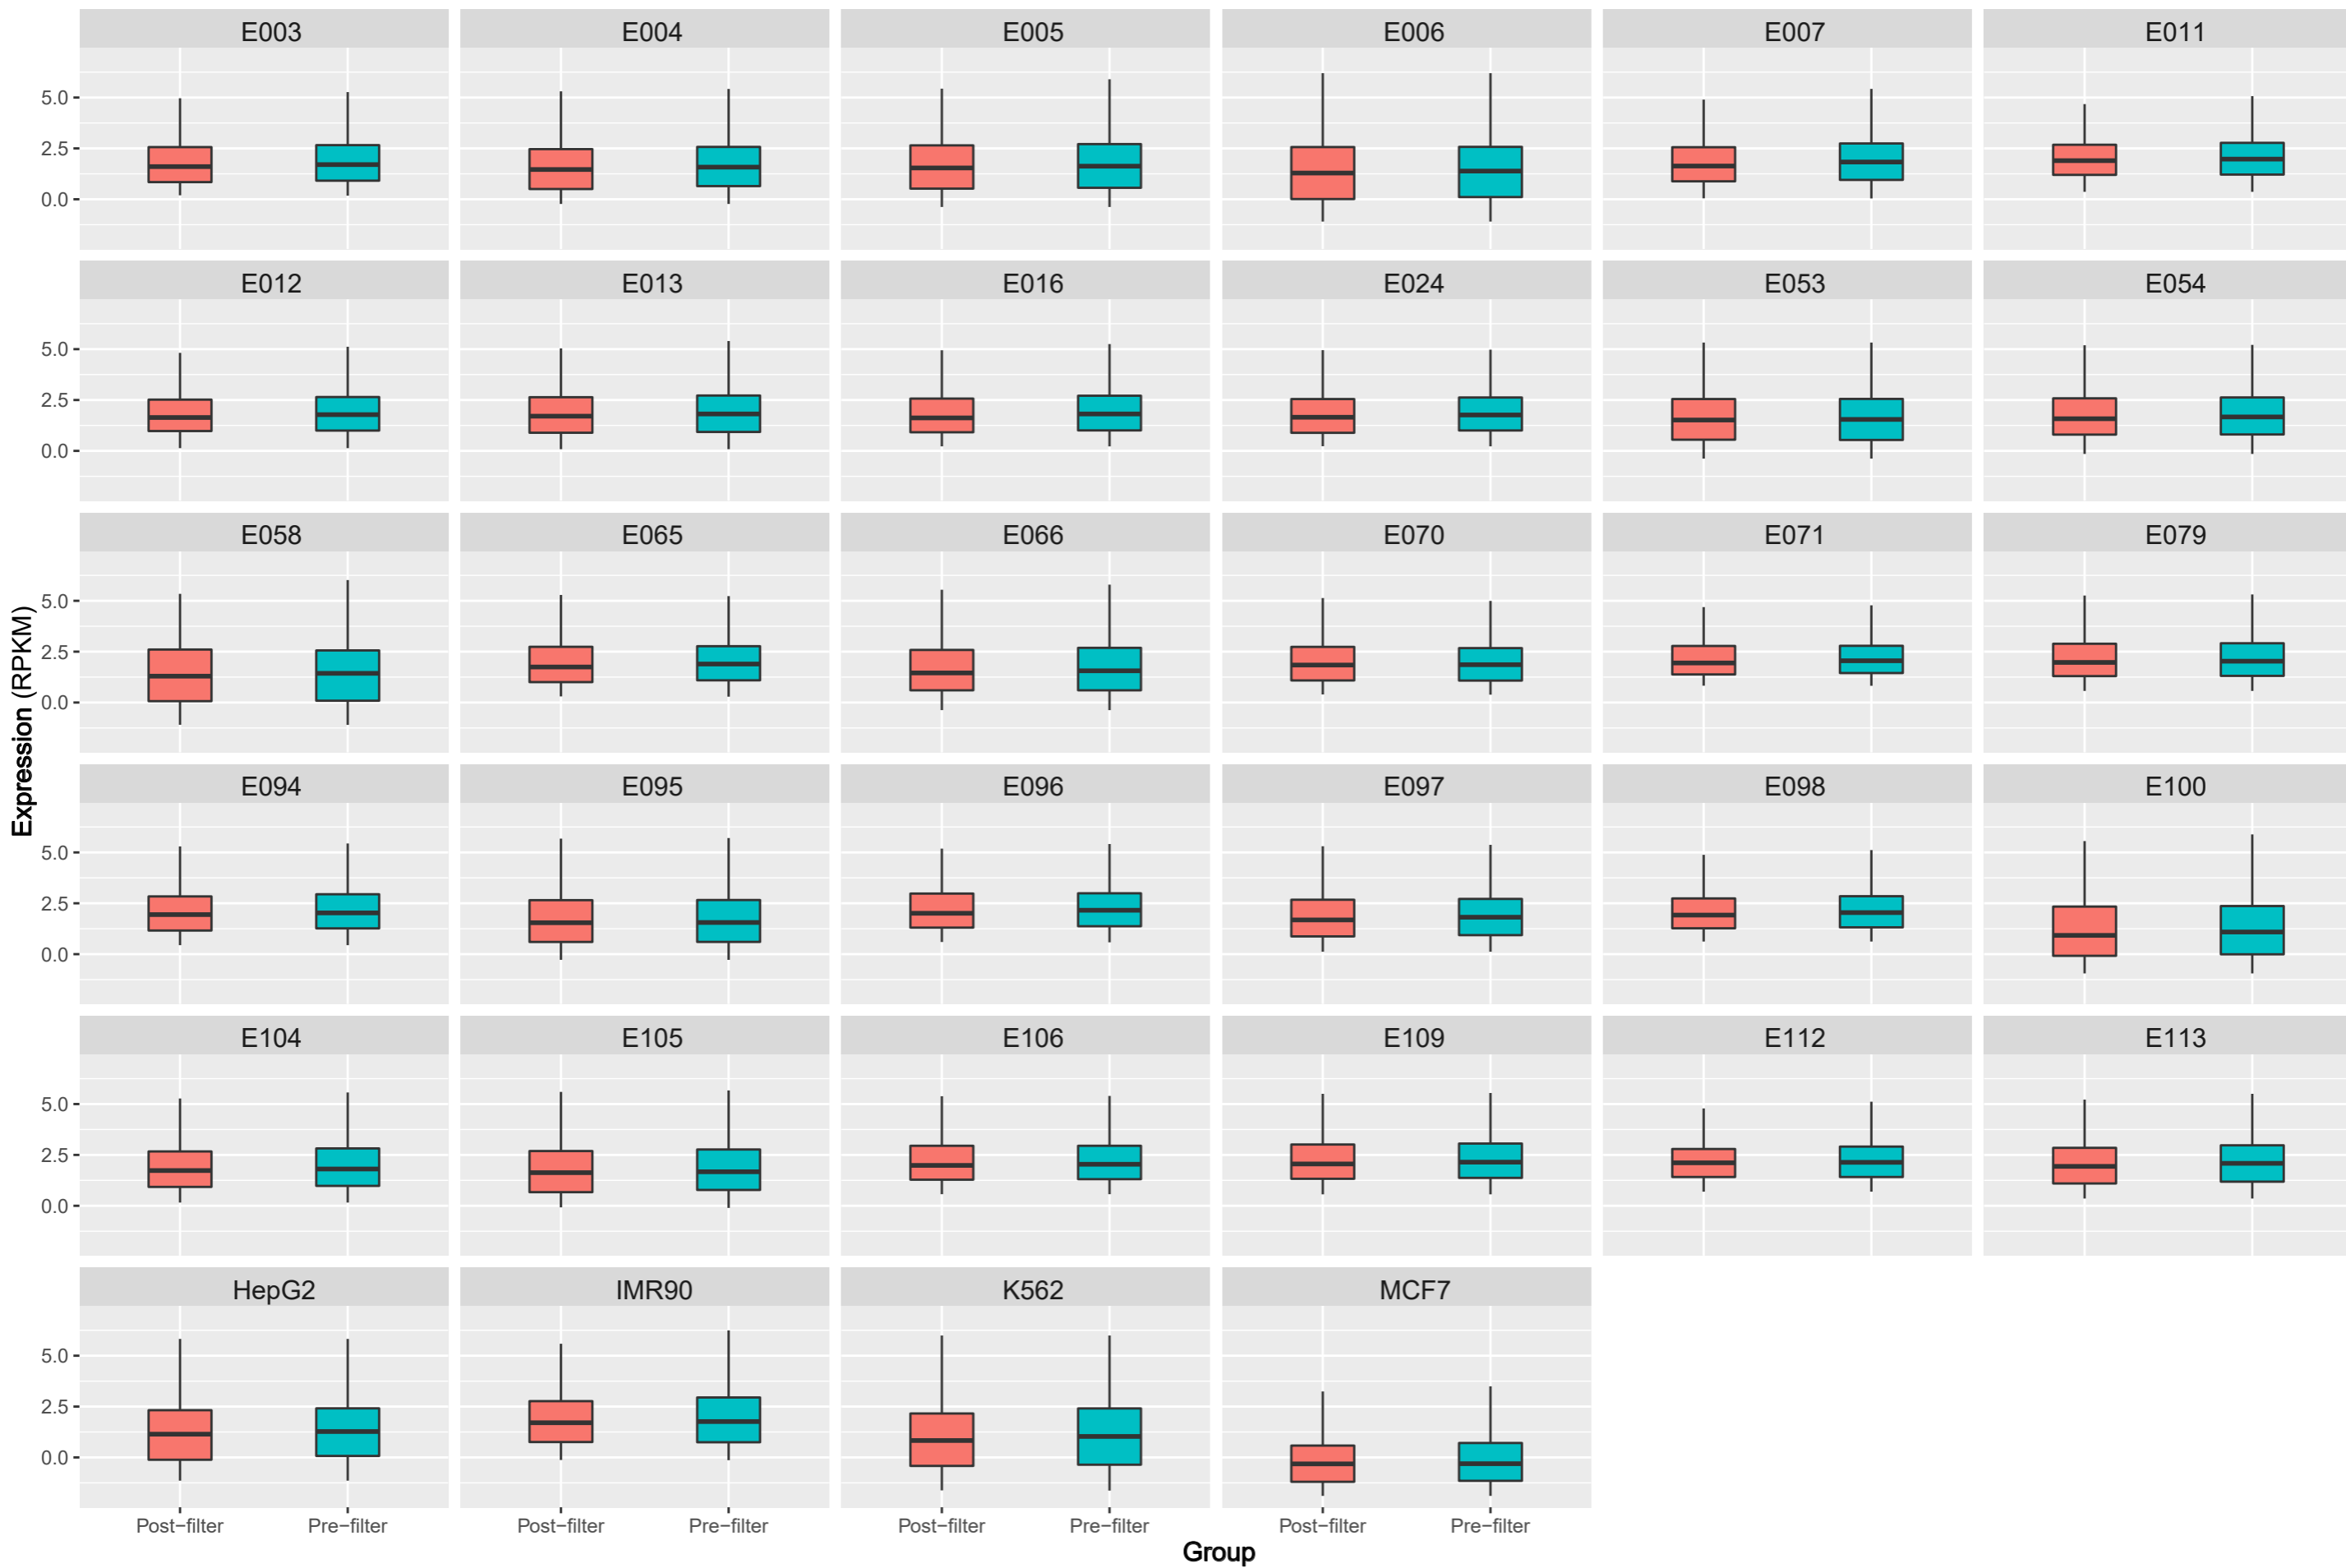

**Supplemental Figure 2b.** Boxplots showing the distribution of expression levels (Y-axes) of MethExp genes before and after a filtration step (X-axes) that discards all loci that contain a neighboring gene spanning the region between them and their associated upstream CGIs. Application of the filter resulted in no differences in the overall expression levels of MethExp genes across 34 tissue types.
