# Supplementary material for: Distal CpG islands can serve as alternative promoters to transcribe genes with silenced proximal promoters
Source: PubMed Central journal article supplement — Genome Res. 2017 Apr;27(4):553–66. doi: 10.1101/gr.212050.116 (PMC5378174; doi:10.1101/gr.212050.116), 2017-04
Supplement: supp_gr.212050.116_Supplemental_Fig_S4.pdf [file supp_gr.212050.116_Supplemental_Fig_S4.pdf]

Group MethExp MethNotExp NotMethExp

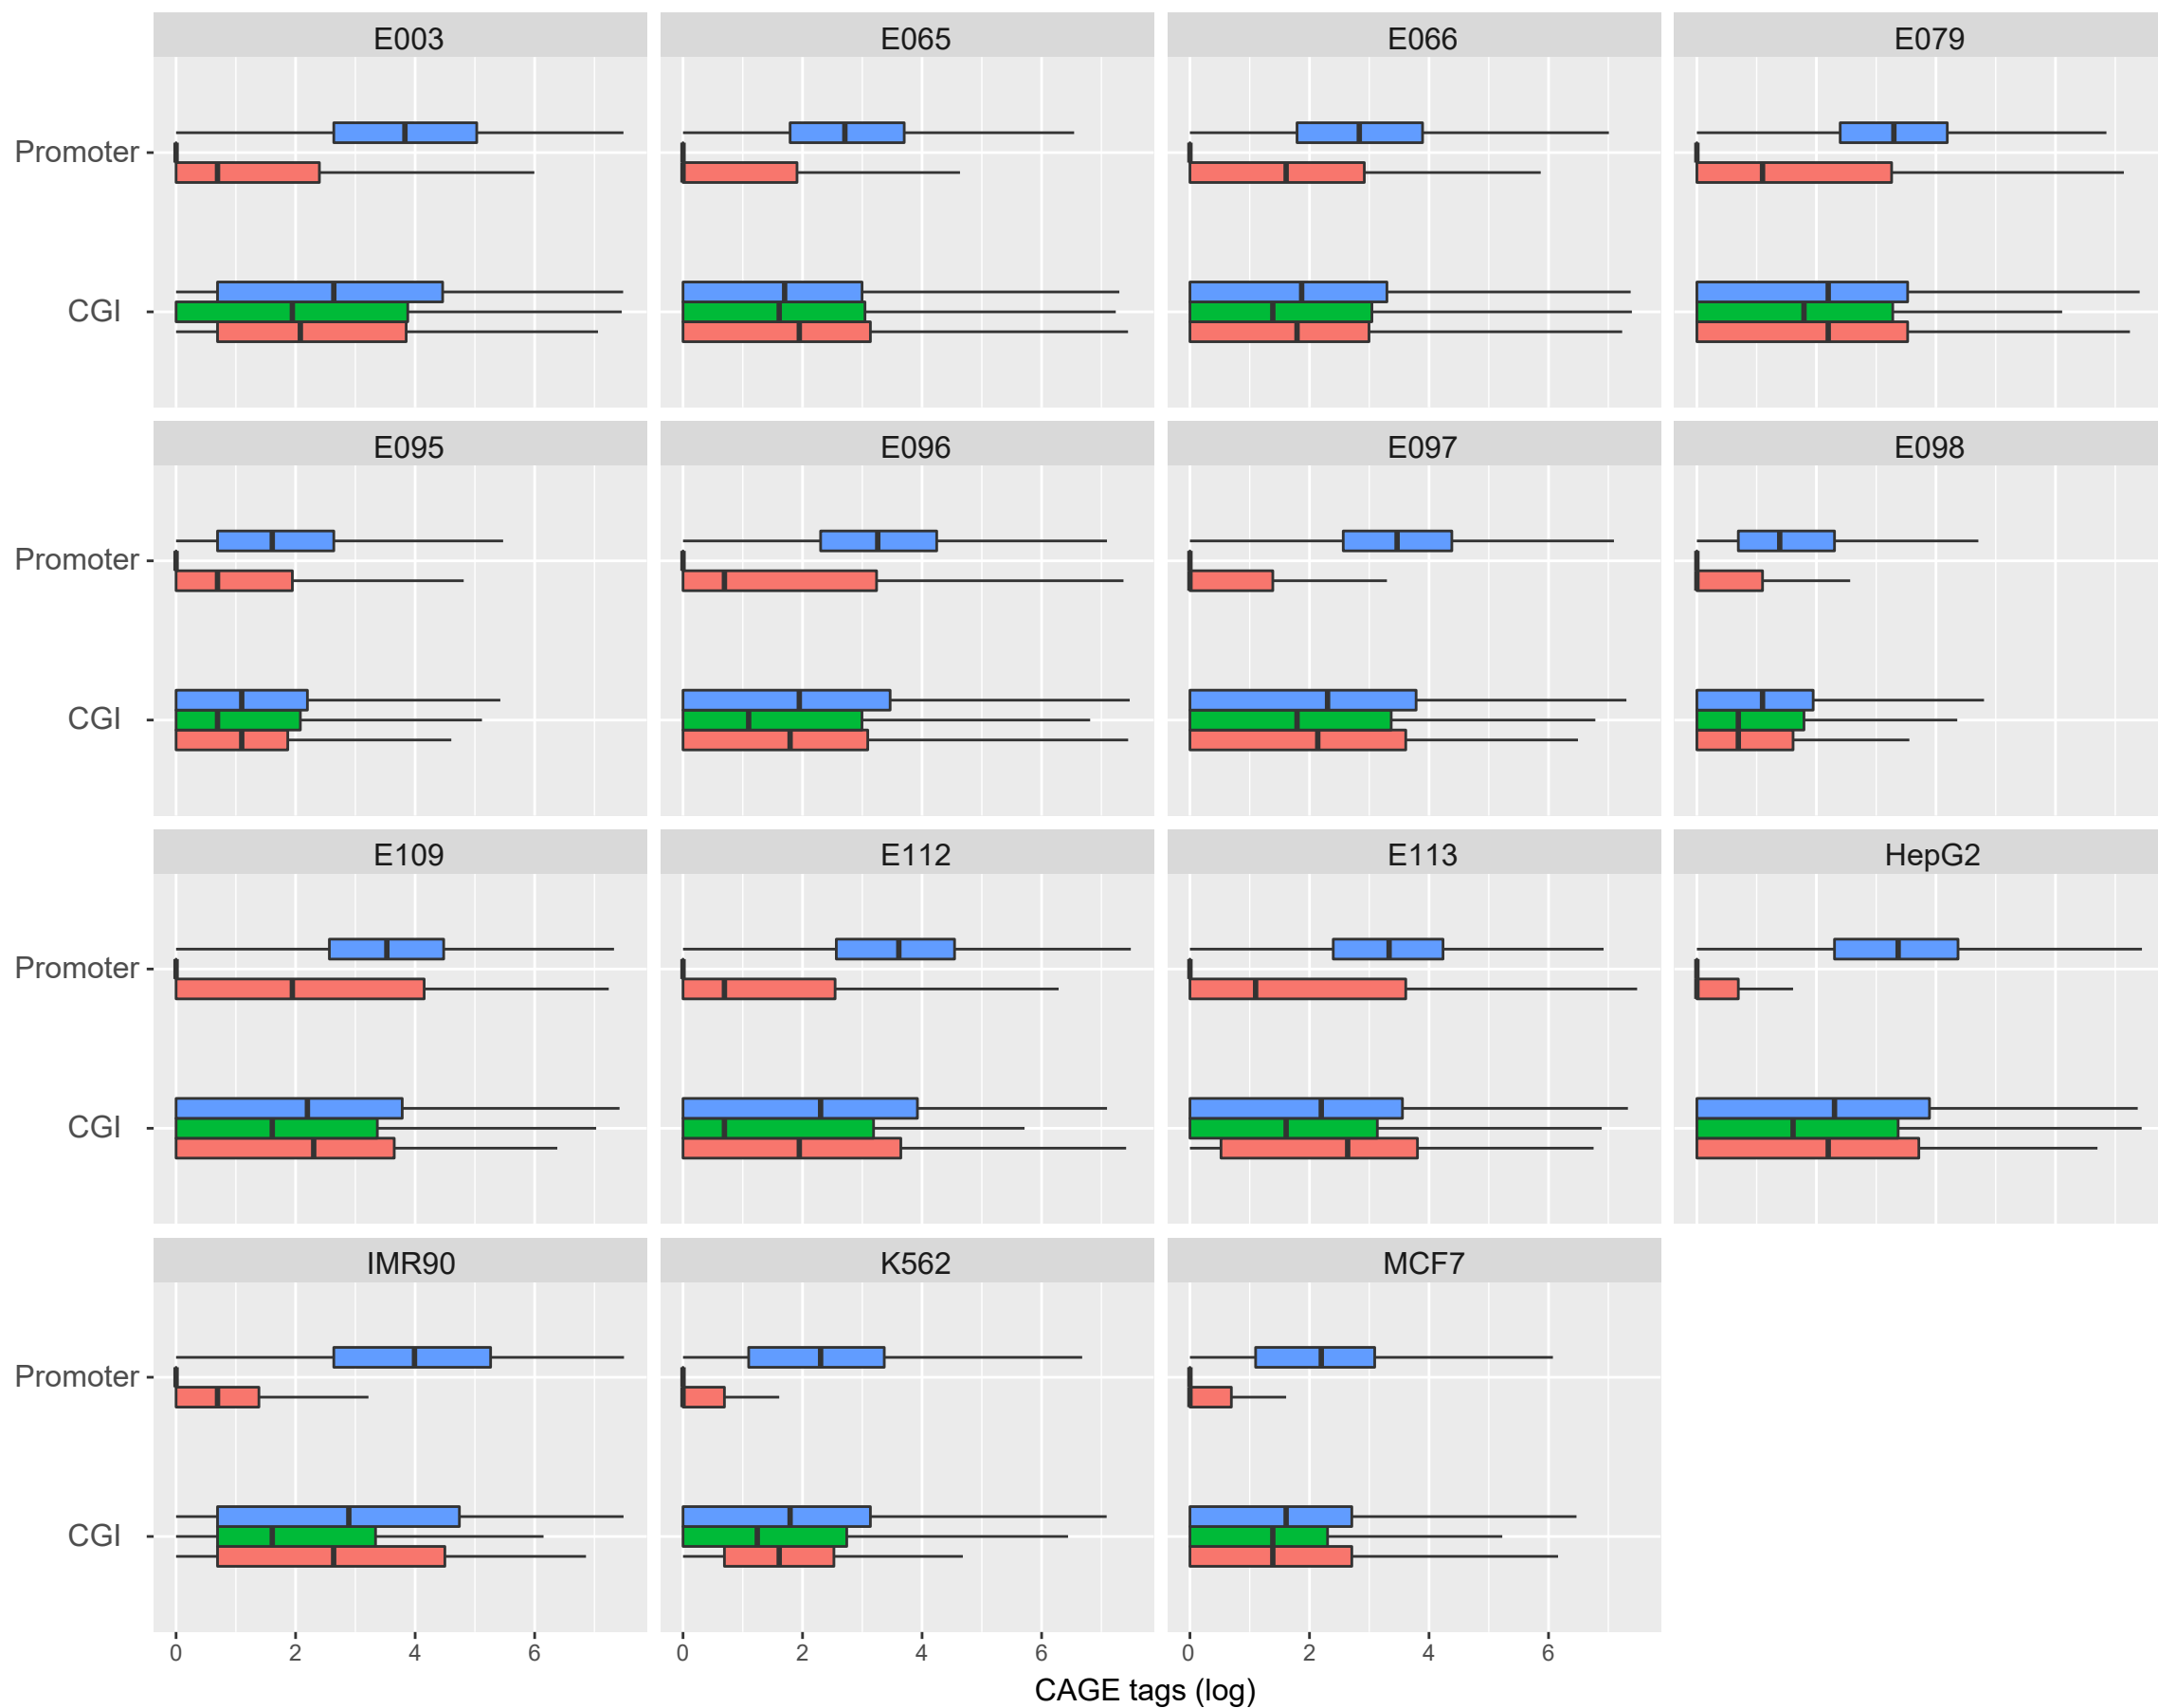

**Supplemental Figure 4.** Boxplots showing the evidence of transcriptional initiation based on CAGE tag intensity (Y-axes; log-transformed) contrasted for three gene groups, MethExp (pink), MethNotExp (green) and NotMethExp (blue) at (i) the upstream CGI, and (ii) the proximal-promoter (X-axes) across 15 tissue types.
