# Supplementary material for: Distal CpG islands can serve as alternative promoters to transcribe genes with silenced proximal promoters
Source: PubMed Central journal article supplement — Genome Res. 2017 Apr;27(4):553–66. doi: 10.1101/gr.212050.116 (PMC5378174; doi:10.1101/gr.212050.116), 2017-04
Supplement: supp_gr.212050.116_Supplemental_Fig_S5.pdf [file supp_gr.212050.116_Supplemental_Fig_S5.pdf]

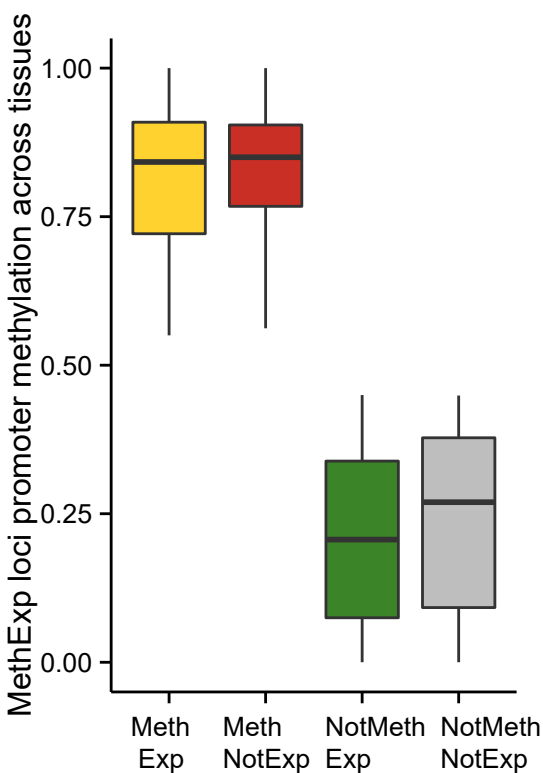

**Supplemental Figure 5.** For the pan-tissue pooled set of MethExp genes, the plot shows the level of fractional methylation (Y-axis) at the promoters of these genes when they are MethExp (yellow), MethNotExp (red), NotMethExp (green) and NotMethNotExp (grey) in other tissues (X-axis).
