# Supplementary material for: Distal CpG islands can serve as alternative promoters to transcribe genes with silenced proximal promoters
Source: PubMed Central journal article supplement — Genome Res. 2017 Apr;27(4):553–66. doi: 10.1101/gr.212050.116 (PMC5378174; doi:10.1101/gr.212050.116), 2017-04
Supplement: supp_gr.212050.116_Supplemental_Fig_S7.pdf [file supp_gr.212050.116_Supplemental_Fig_S7.pdf]

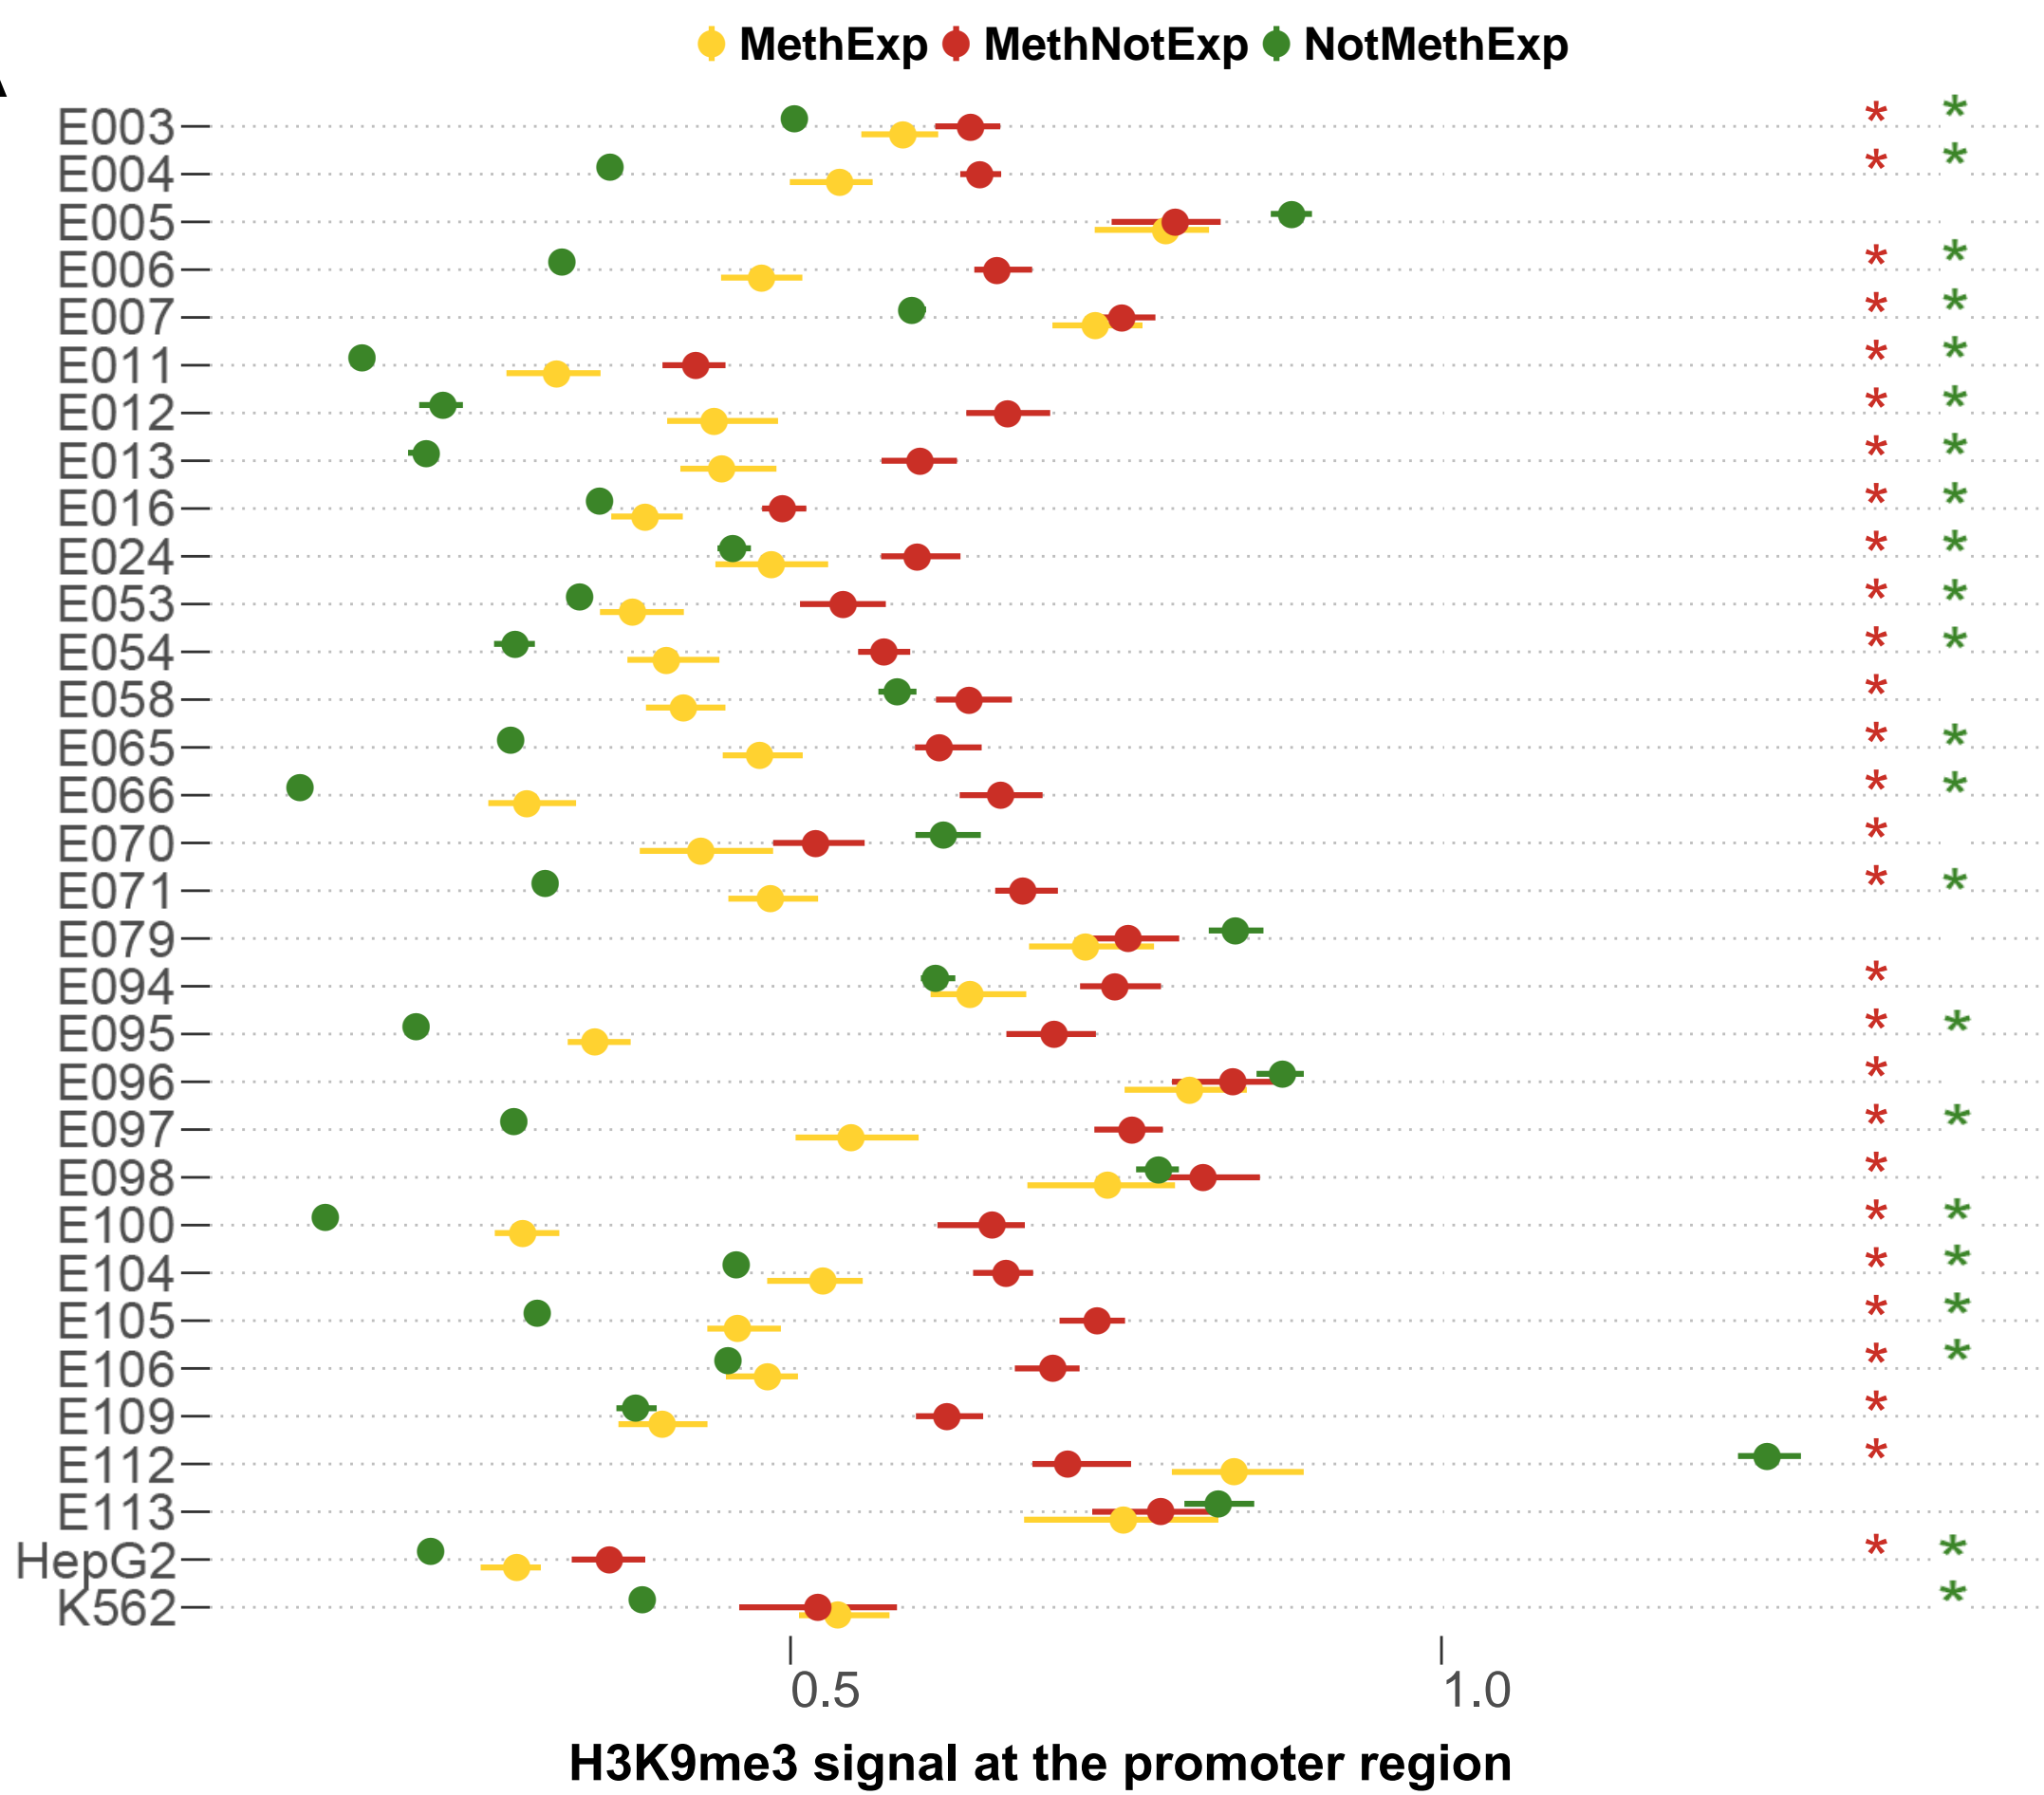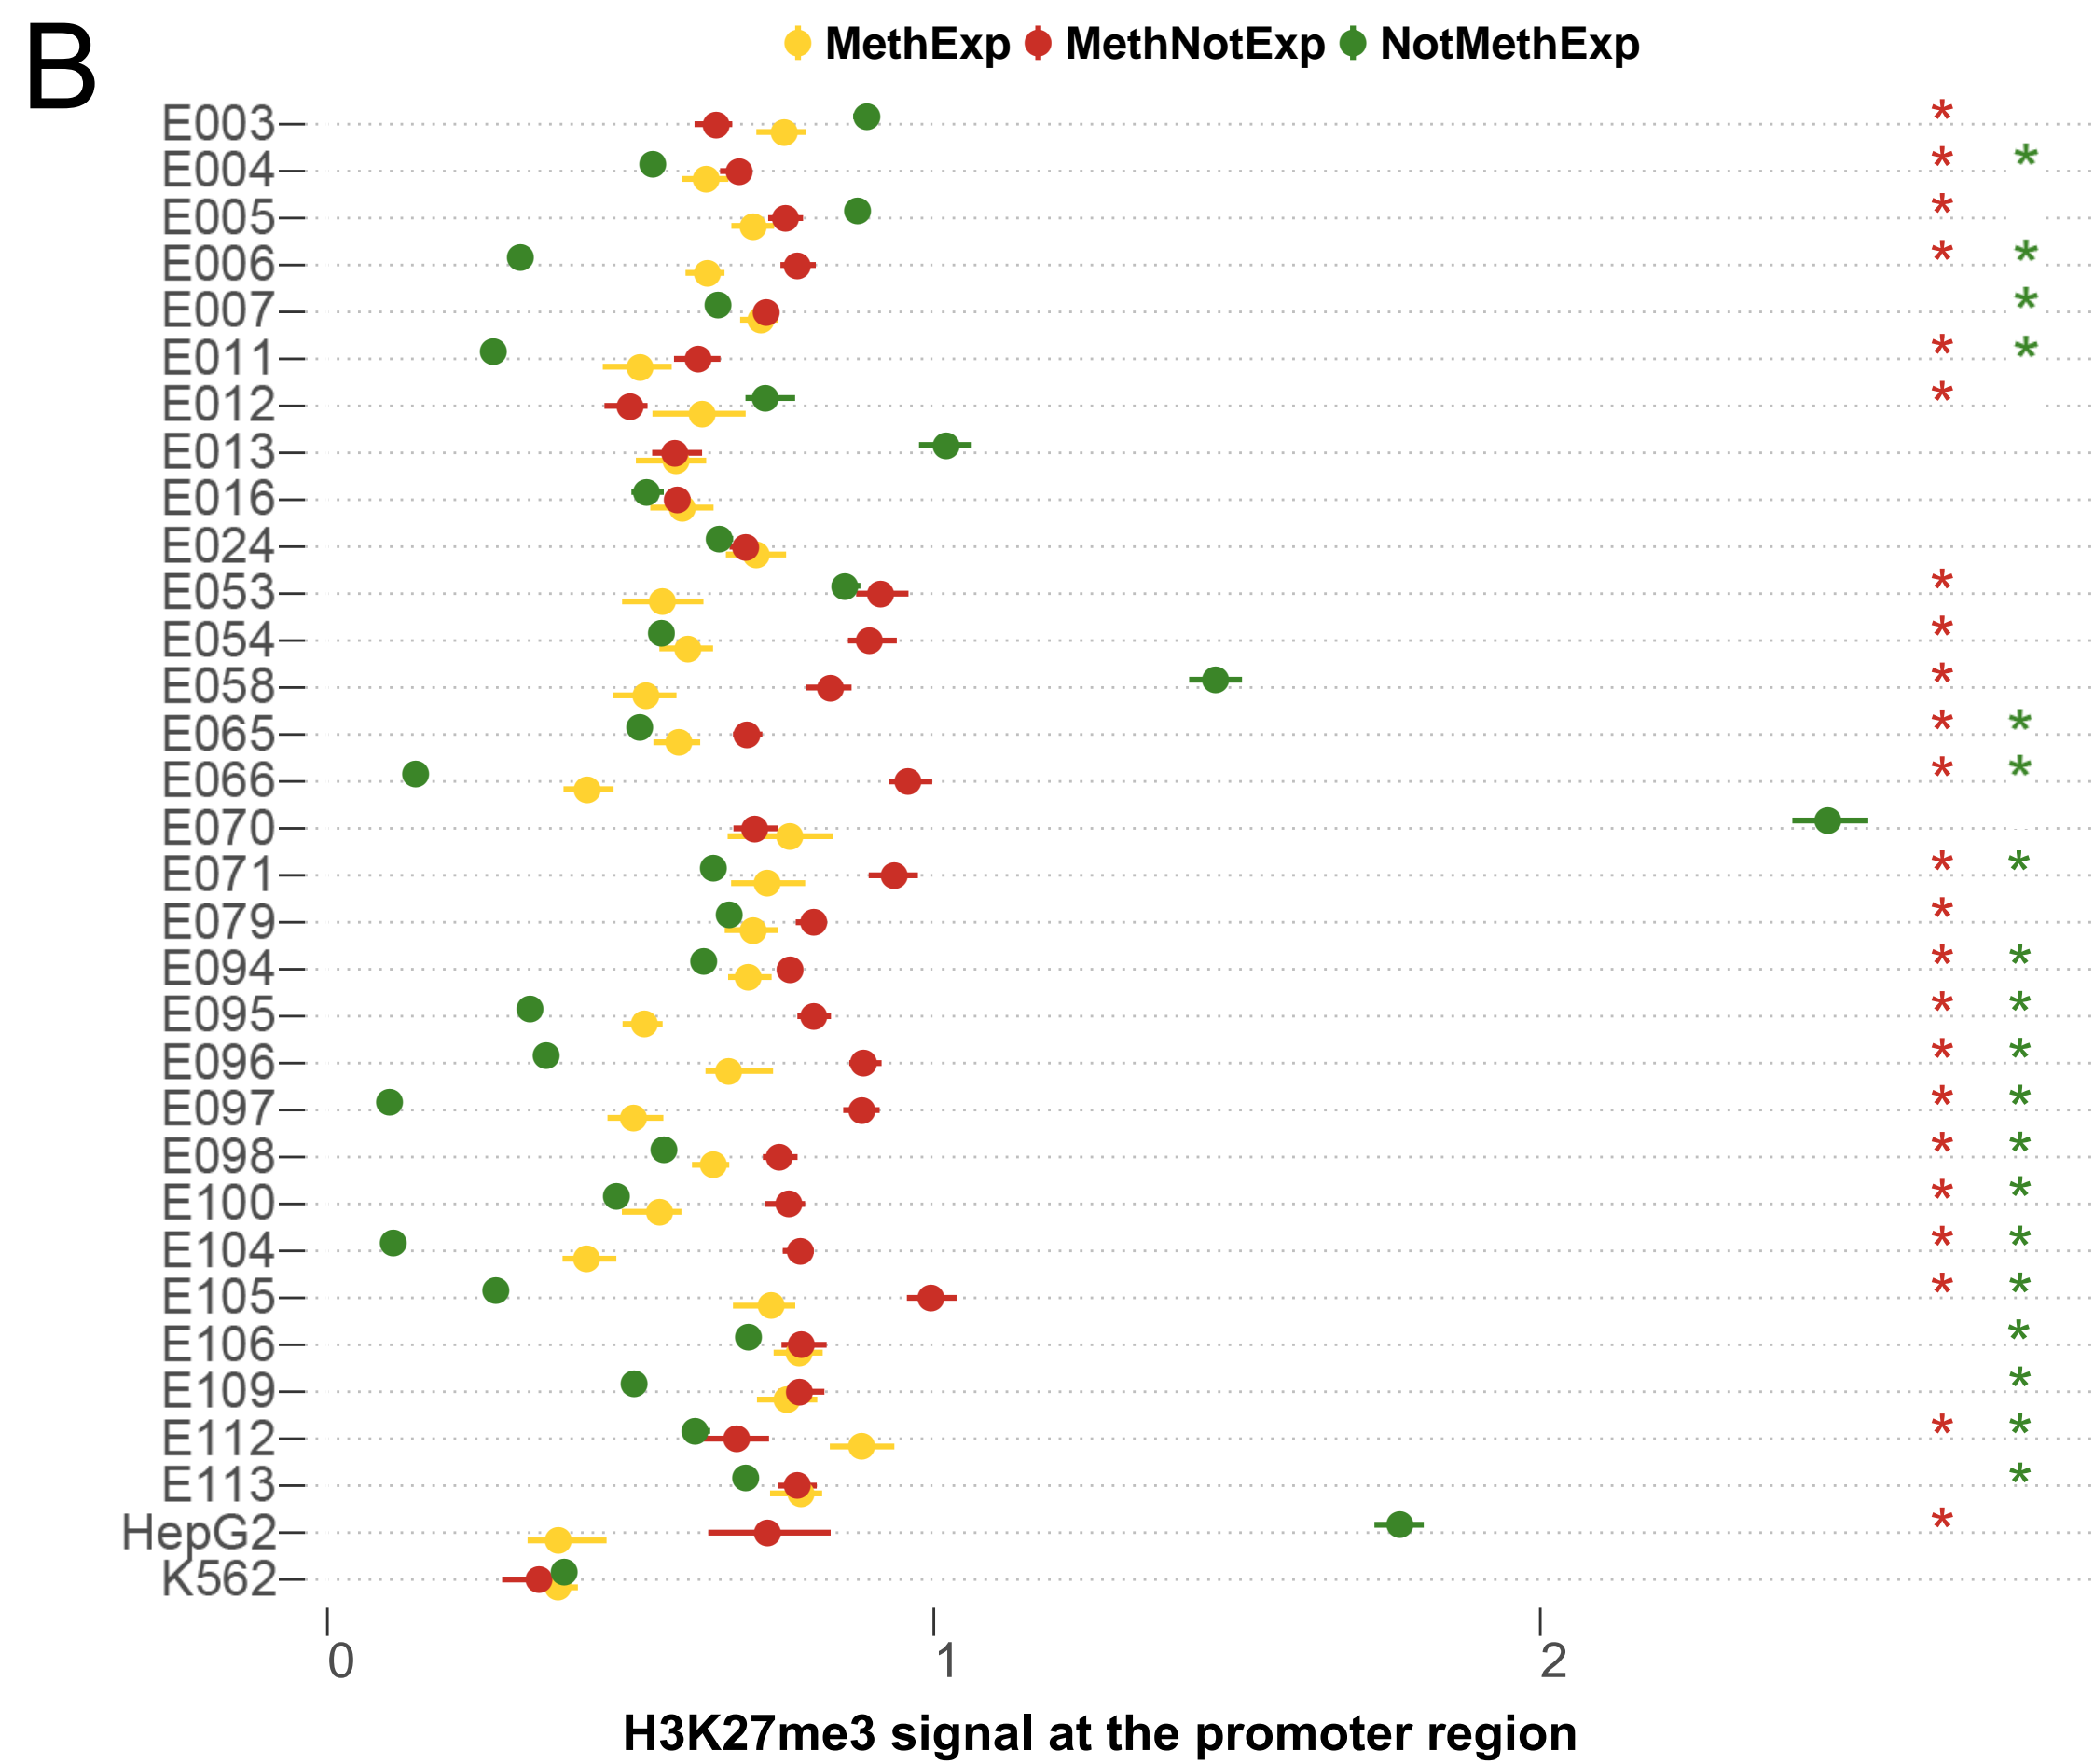

**Supplemental Figure 7. Repressive marks at the promoter region.** (A) Median H3K9me3 signal, (B) median H3K27me3 signal, and 95% CI (X-axes) associated with the promoter regions of MethExp (yellow), MethNotExp (red) and NotMethExp (green) genes across 32 tissue types (Y-axes).
