# Supplementary material for: Distal CpG islands can serve as alternative promoters to transcribe genes with silenced proximal promoters
Source: PubMed Central journal article supplement — Genome Res. 2017 Apr;27(4):553–66. doi: 10.1101/gr.212050.116 (PMC5378174; doi:10.1101/gr.212050.116), 2017-04
Supplement: supp_gr.212050.116_Supplemental_Fig_S9c.pdf [file supp_gr.212050.116_Supplemental_Fig_S9c.pdf]

Group MethExp MethNotExp NotMethExp

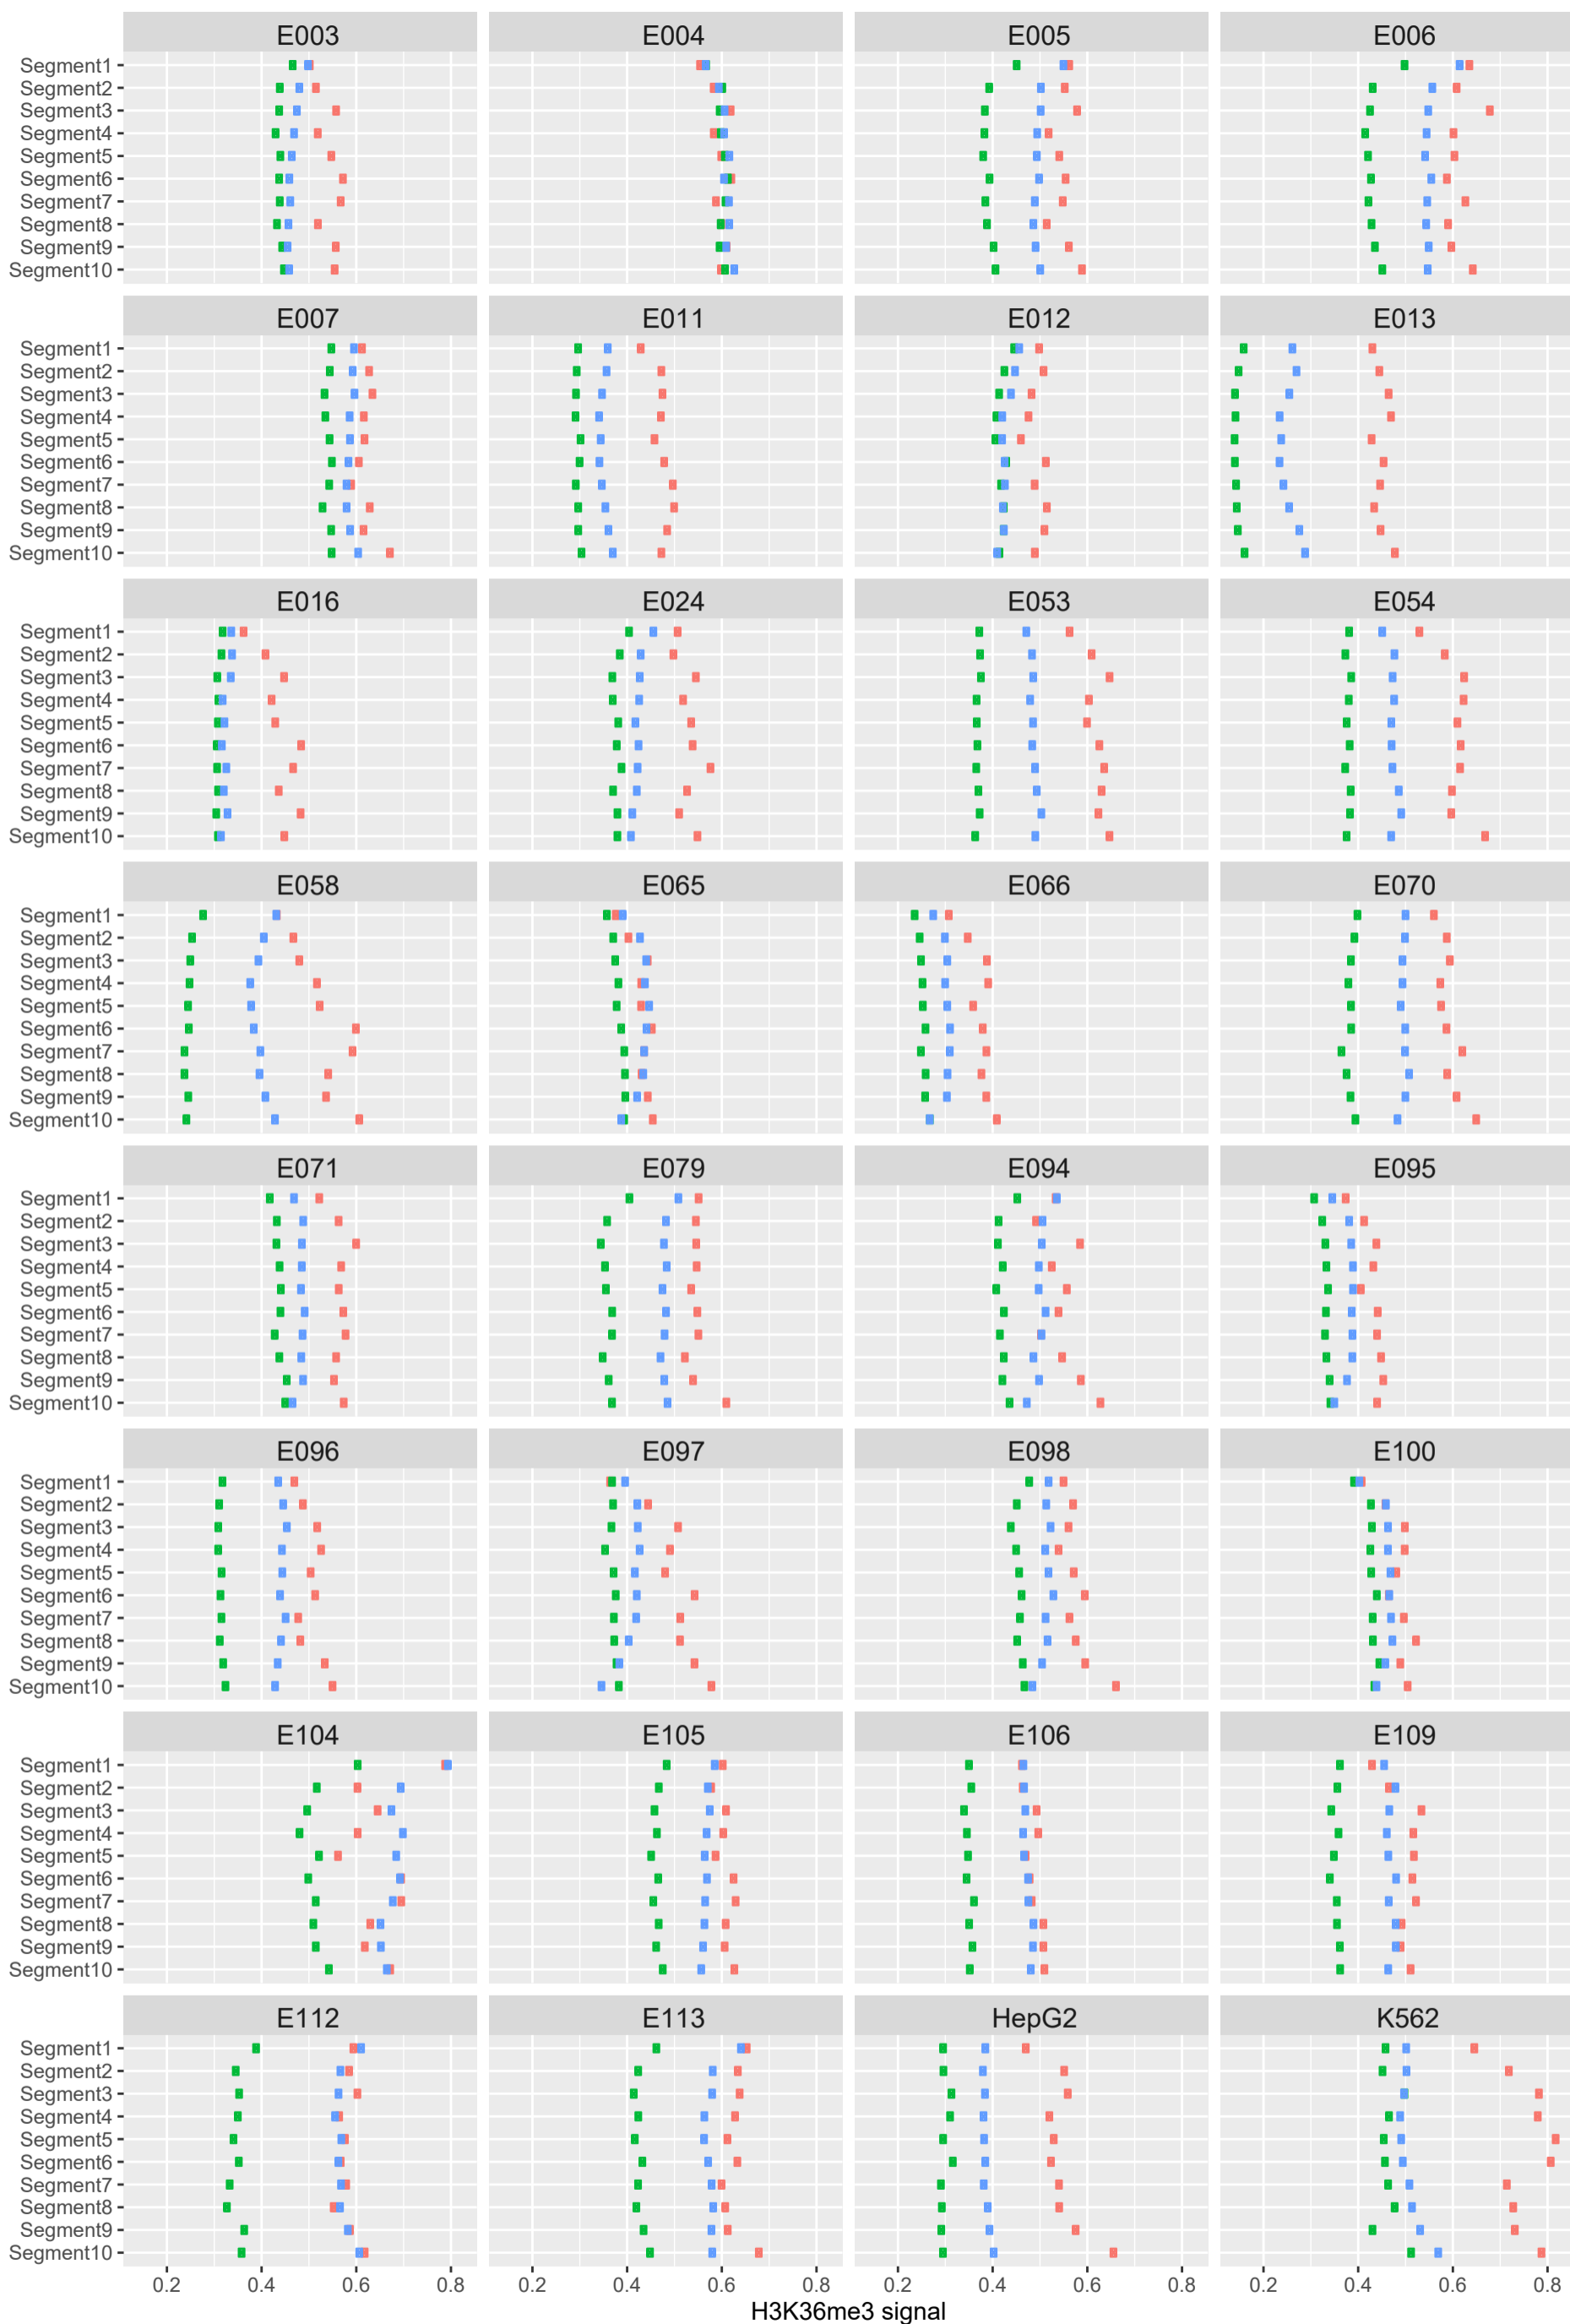

**Supplemental Figure 9c.** Median H3K36me3 ChIP-seq signal intensities (X-axes; log transformed) in each of 10 equal bins of the segment region associated with MethExp (pink), MethNotExp (green) and NotMethExp (blue) genes across 34 tissue types.
