# Supplementary material for: Distal CpG islands can serve as alternative promoters to transcribe genes with silenced proximal promoters
Source: PubMed Central journal article supplement — Genome Res. 2017 Apr;27(4):553–66. doi: 10.1101/gr.212050.116 (PMC5378174; doi:10.1101/gr.212050.116), 2017-04
Supplement: supp_gr.212050.116_Supplemental_Fig_S10.pdf [file supp_gr.212050.116_Supplemental_Fig_S10.pdf]

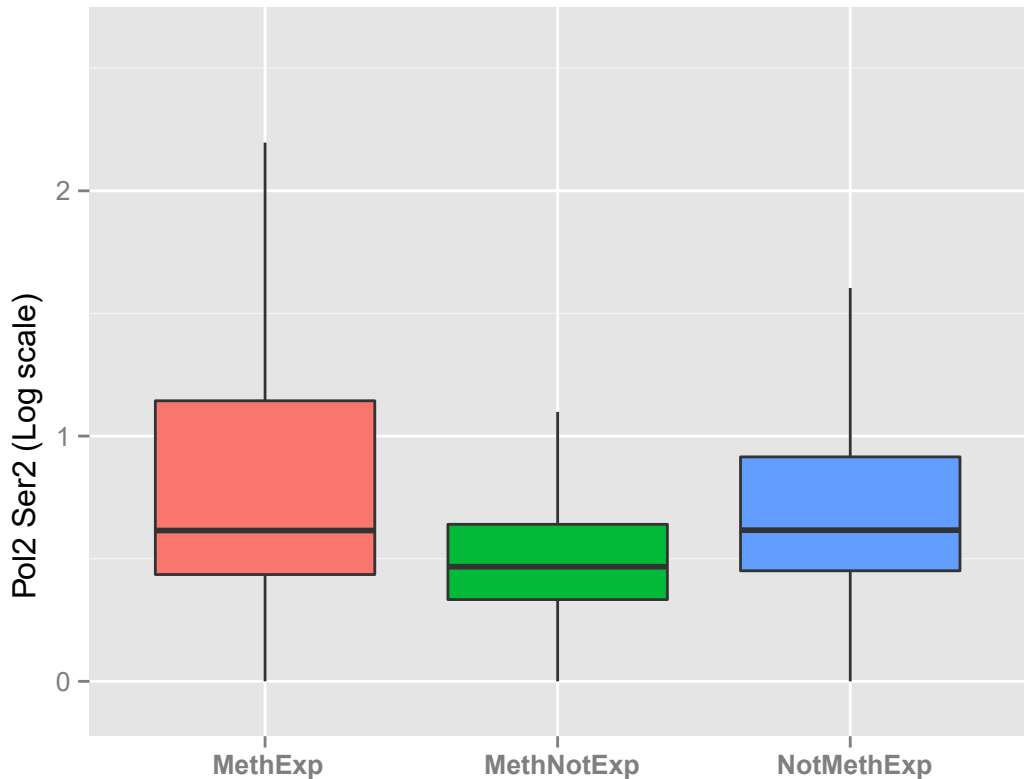

**Supplemental Figure 10.** The evidence of transcriptional elongation based on PolII-Ser2 signals (Y-axis) in the segment region associated with three gene groups, MethExp (pink), MethNotExp (green) and NotMethExp (blue) (X-axis).
