# Supplementary material for: Distal CpG islands can serve as alternative promoters to transcribe genes with silenced proximal promoters
Source: PubMed Central journal article supplement — Genome Res. 2017 Apr;27(4):553–66. doi: 10.1101/gr.212050.116 (PMC5378174; doi:10.1101/gr.212050.116), 2017-04
Supplement: supp_gr.212050.116_Supplemental_Fig_S13.pdf [file supp_gr.212050.116_Supplemental_Fig_S13.pdf]

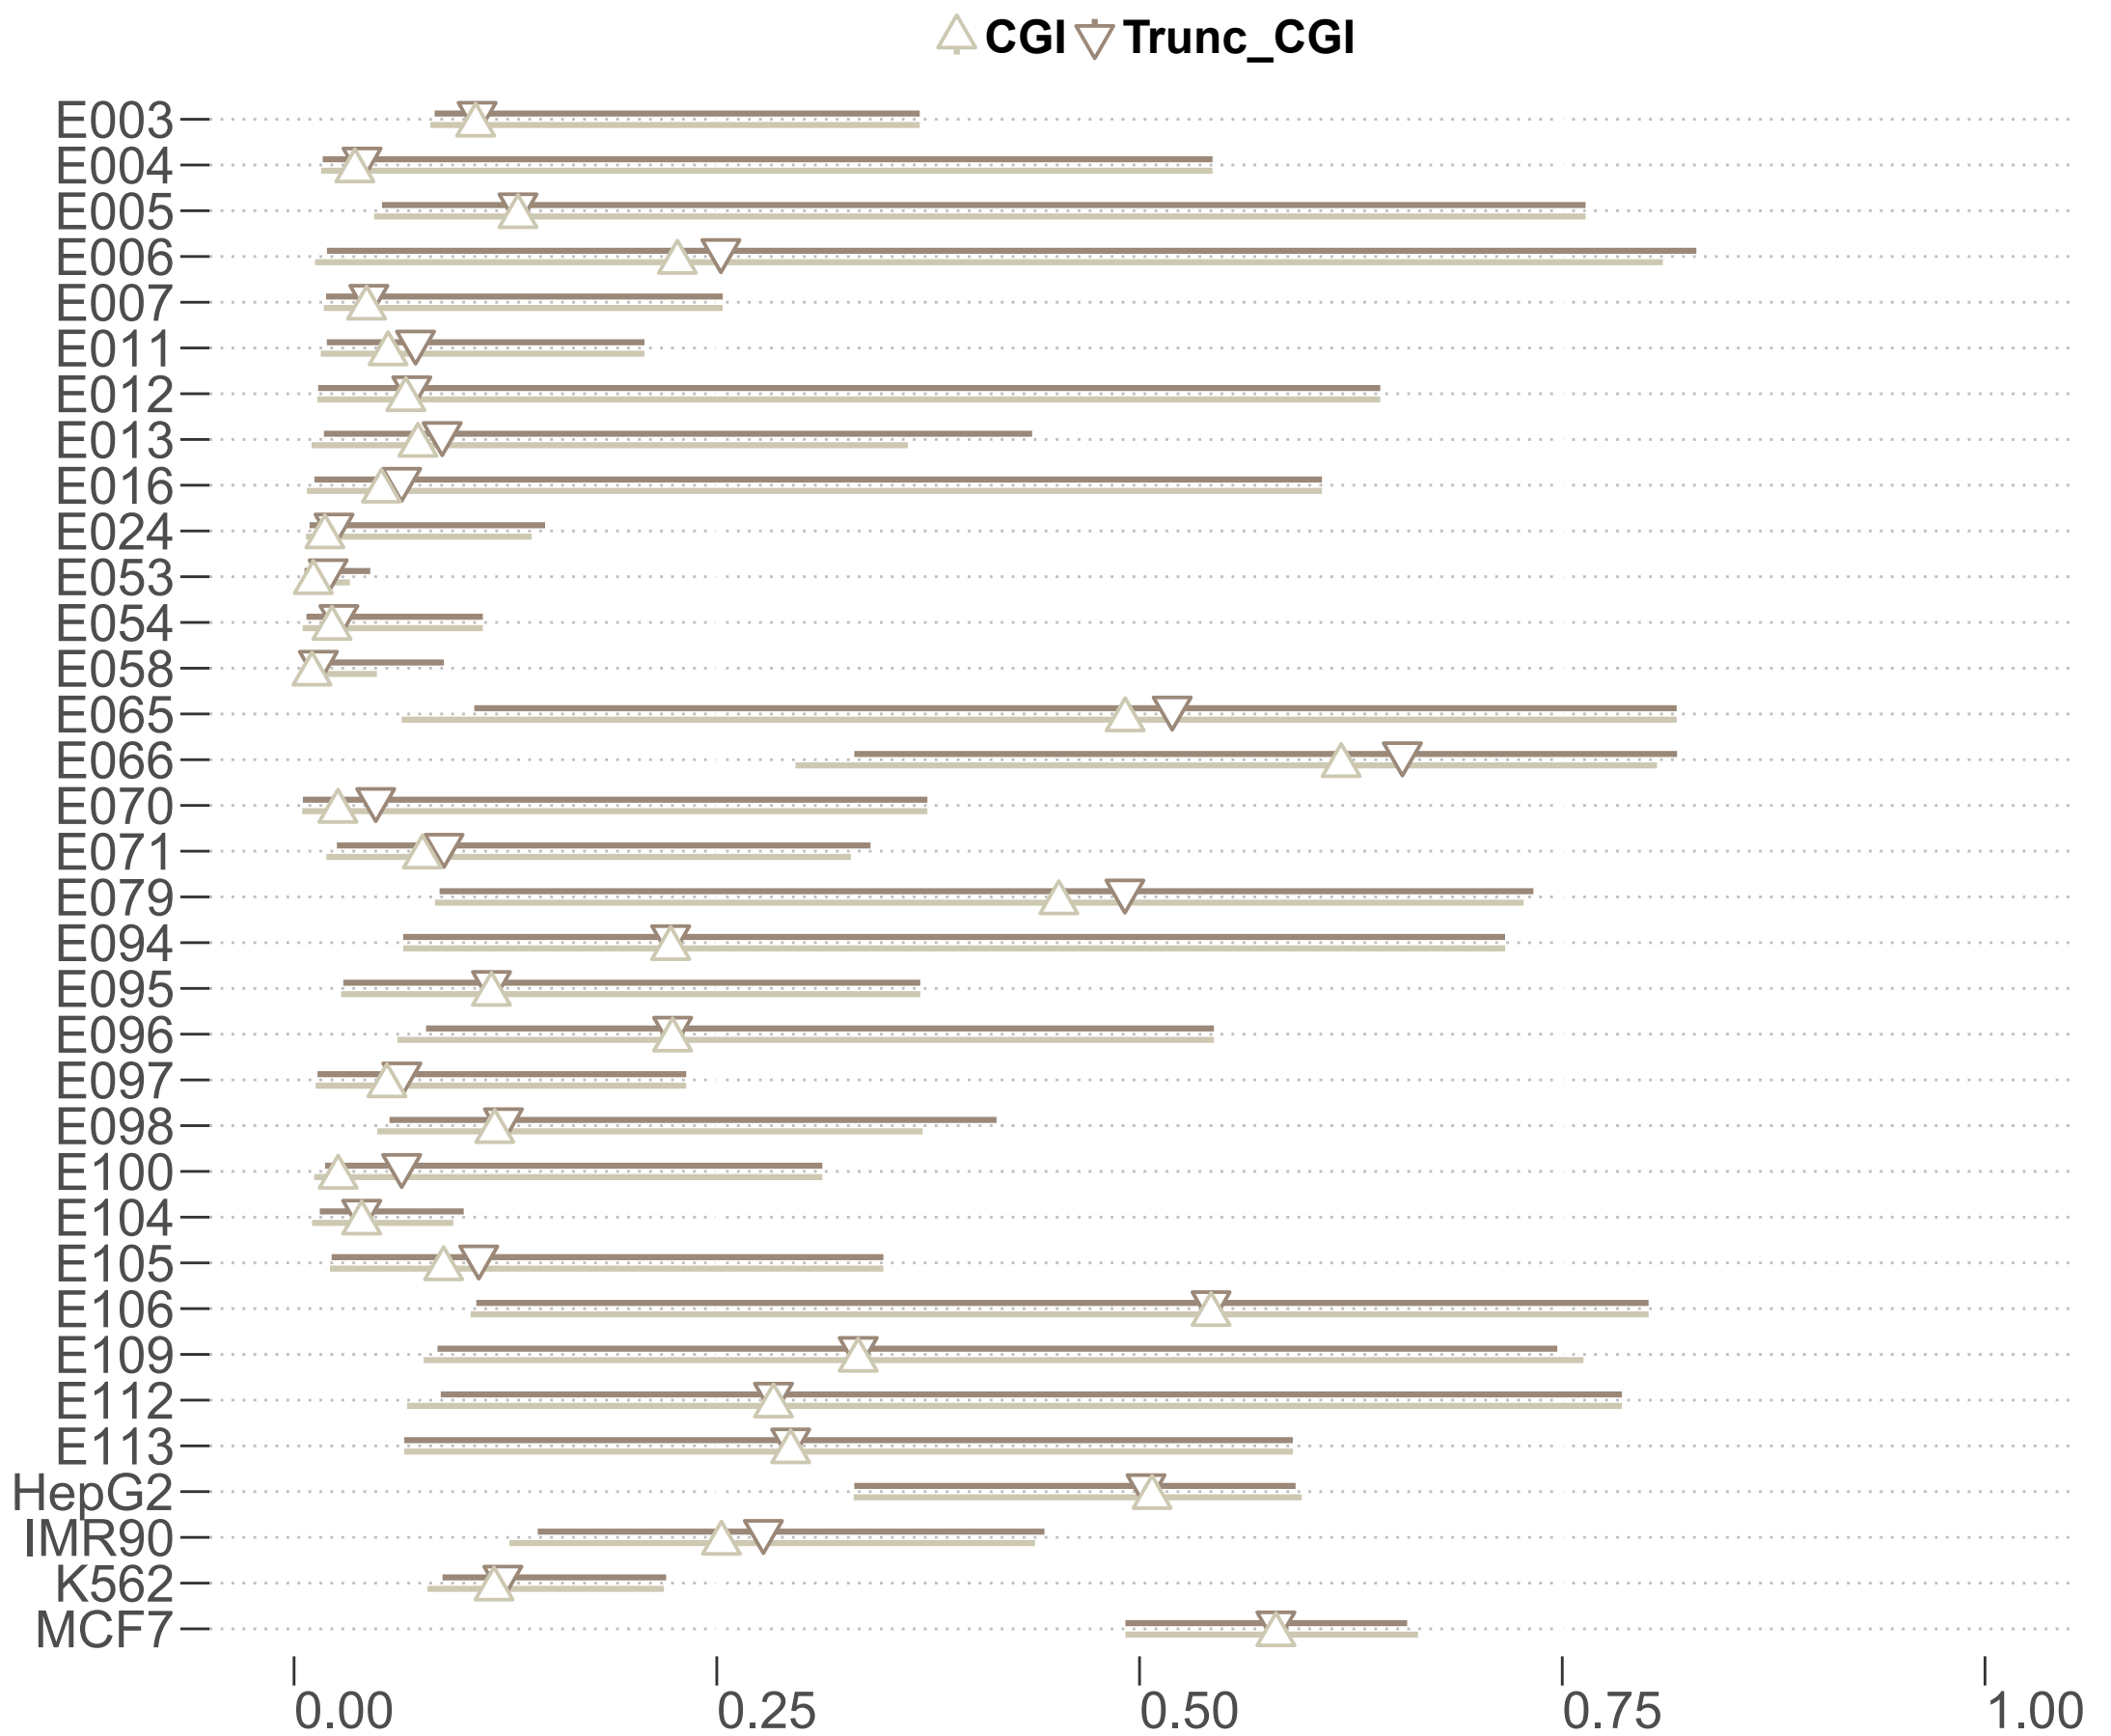

**Supplemental Figure 13.** Median fractional methylation levels (X-axis) and 95% CI at the distal CGIs associated with MethExp genes before (light gray) and after (dark gray) truncation of these loci to 1 kb across 34 tissue types (Y-axis). Significant differences are marked with an asterisk. Truncation resulted in negligible differences in these distributions in all tissues.
