# Supplementary material for: Distal CpG islands can serve as alternative promoters to transcribe genes with silenced proximal promoters
Source: HighWire-hosted journal article supplement (doi:10.1101/gr.212050.116), 2017-02-21
Supplement: Supplemental_Table_S1.xlsx [file Supplemental_Table_S1.xlsx]

## Sheet: Sheet1
Supplementary Table 1. Metadata associated with the 34 tissue types used in our analyses.
Group	Tissue ID	Description	Data Source	Link
ESC	E003	H1 Cells	Roadmap	http://egg2.wustl.edu/roadmap/web_portal/
ESC	E016	HUES64 Cells	Roadmap	http://egg2.wustl.edu/roadmap/web_portal/
ESC	E024	ES-UCSF4 (4STAR) Cells	Roadmap	http://egg2.wustl.edu/roadmap/web_portal/
ES-derived	E004	H1 BMP4 Derived Mesendoderm Cultured Cells	Roadmap	http://egg2.wustl.edu/roadmap/web_portal/
ES-derived	E005	H1 BMP4 Derived Trophoblast Cultured Cells	Roadmap	http://egg2.wustl.edu/roadmap/web_portal/
ES-derived	E006	H1 Derived Mesenchymal Stem Cells	Roadmap	http://egg2.wustl.edu/roadmap/web_portal/
ES-derived	E007	H1 Derived Neuronal Progenitor Cultured Cells	Roadmap	http://egg2.wustl.edu/roadmap/web_portal/
ES-derived	E011	hESC Derived CD184+ Endoderm Cultured Cells	Roadmap	http://egg2.wustl.edu/roadmap/web_portal/
ES-derived	E012	hESC Derived CD56+ Ectoderm Cultured Cells	Roadmap	http://egg2.wustl.edu/roadmap/web_portal/
ES-derived	E013	hESC Derived CD56+ Mesoderm Cultured Cells	Roadmap	http://egg2.wustl.edu/roadmap/web_portal/
Neurosphere	E053	Cortex derived primary cultured neurospheres	Roadmap	http://egg2.wustl.edu/roadmap/web_portal/
Neurosphere	E054	Ganglion Eminence derived primary cultured neurospheres	Roadmap	http://egg2.wustl.edu/roadmap/web_portal/
Thymus	E112	Thymus	Roadmap	http://egg2.wustl.edu/roadmap/web_portal/
Epithelial	E058	Foreskin Keratinocyte Primary Cells	Roadmap	http://egg2.wustl.edu/roadmap/web_portal/
Brain	E070	Brain Germinal Matrix	Roadmap	http://egg2.wustl.edu/roadmap/web_portal/
Brain	E071	Brain Hippocampus Middle	Roadmap	http://egg2.wustl.edu/roadmap/web_portal/
Muscle	E100	Psoas Muscle	Roadmap	http://egg2.wustl.edu/roadmap/web_portal/
Heart	E065	Aorta	Roadmap	http://egg2.wustl.edu/roadmap/web_portal/
Heart	E095	Left Ventricle	Roadmap	http://egg2.wustl.edu/roadmap/web_portal/
Heart	E104	Right Atrium	Roadmap	http://egg2.wustl.edu/roadmap/web_portal/
Heart	E105	Right Ventricle	Roadmap	http://egg2.wustl.edu/roadmap/web_portal/
Digestive	E079	Esophagus	Roadmap	http://egg2.wustl.edu/roadmap/web_portal/
Digestive	E094	Gastric	Roadmap	http://egg2.wustl.edu/roadmap/web_portal/
Digestive	E106	Sigmoid Colon	Roadmap	http://egg2.wustl.edu/roadmap/web_portal/
Digestive	E109	Small Intestine	Roadmap	http://egg2.wustl.edu/roadmap/web_portal/
Other	E066	Liver	Roadmap	http://egg2.wustl.edu/roadmap/web_portal/
Other	E096	Lung	Roadmap	http://egg2.wustl.edu/roadmap/web_portal/
Other	E097	Ovary	Roadmap	http://egg2.wustl.edu/roadmap/web_portal/
Other	E098	Pancreas	Roadmap	http://egg2.wustl.edu/roadmap/web_portal/
Other	E113	Spleen	Roadmap	http://egg2.wustl.edu/roadmap/web_portal/
ENCODE	HepG2	HepG2 Hepatocellular Carcinoma Cell Line	Roadmap, GSE46644	http://egg2.wustl.edu/roadmap/web_portal/ http://www.ncbi.nlm.nih.gov/geo/query/acc.cgi?acc=GSE46644
ENCODE	IMR90	NHLF Lung Fibroblast Primary Cells	Roadmap, GSE46644	http://egg2.wustl.edu/roadmap/web_portal/ http://www.ncbi.nlm.nih.gov/geo/query/acc.cgi?acc=GSE46644
ENCODE	MCF7	NHEK-Epidermal Keratinocyte Primary Cells	GSE54693	http://www.ncbi.nlm.nih.gov/geo/query/acc.cgi?acc=GSE54693
ENCODE	K562	K562 Leukemia Cells	Roadmap, GSE64929	http://egg2.wustl.edu/roadmap/web_portal/ http://www.ncbi.nlm.nih.gov/geo/query/acc.cgi?acc=GSE64929
