# Supplementary material for: Distal CpG islands can serve as alternative promoters to transcribe genes with silenced proximal promoters
Source: HighWire-hosted journal article supplement (doi:10.1101/gr.212050.116), 2017-02-21
Supplement: Supplemental_Table_S2.xlsx [file Supplemental_Table_S2.xlsx]

## Sheet: Sheet1
Supplementary Table 2. The number of genes before (blue) and applying a filtration step (green) that discards all loci that contain a neighboring gene spanning the region between them and their associated upstream CGIs in all 34 tissue types. Columns B and F correspond to all promoter-methylated genes. Columns C and G correspond to those that are highly expressed (greater than 50th percentile) in…
	PRE-FILTER				POST-FILTER
Tissue	Promoter-methylated genes	Highly expressed promoter-methylated genes	Highly expressed promoter-methylated genes (unexplained)		Promoter-methylated genes	Highly expressed promoter-methylated genes	Highly expressed promoter-methylated genes (unexplained)
E003	10335	1493	653		3651	419	180
E004	10155	1454	624		3598	413	148
E005	10221	1645	746		3611	474	196
E006	9783	1637	736		3496	454	125
E007	10313	1436	629		3640	421	177
E011	10575	1452	660		3732	424	215
E012	10686	1491	694		3785	445	234
E013	10392	1583	695		3676	436	217
E016	10334	1382	583		3651	403	183
E024	10035	1387	610		3545	414	219
E053	9325	1500	668		3266	420	173
E054	9290	1484	660		3283	422	196
E058	8381	1312	560		2999	361	109
E065	9024	1795	748		3246	554	259
E066	9168	1947	752		3298	557	270
E070	9187	1369	596		3242	382	188
E071	9526	1635	788		3397	455	265
E079	9147	1557	694		3279	433	270
E094	8877	1527	675		3182	425	247
E095	9333	1603	773		3346	445	218
E096	9326	1766	810		3308	483	274
E097	8602	1399	610		3064	388	192
E098	8327	1544	746		2951	434	284
E100	8729	1535	704		3115	407	135
E104	9043	1530	725		3247	428	225
E105	9156	1608	746		3283	440	212
E106	9312	1731	811		3319	486	320
E109	9349	1713	805		3338	492	327
E112	9703	2063	793		3445	559	311
E113	9303	1808	788		3323	493	288
HepG2	4089	1369	586		1330	350	150
K562	2312	1094	558		647	262	109
MCF7	8874	1699	866		3227	493	331
IMR90	6947	1588	704		2415	422	262
