# Supplementary material for: Distal CpG islands can serve as alternative promoters to transcribe genes with silenced proximal promoters
Source: HighWire-hosted journal article supplement (doi:10.1101/gr.212050.116), 2017-02-21
Supplement: Supplemental_Table_S4.xlsx [file Supplemental_Table_S4.xlsx]

## Sheet: Breast Cancer
Supplementary Table 4. List of hypermethylated-promoter genes in breast cancer that use distal CGIs as alternative promoters.
GeneID
ENSG00000075073
ENSG00000081248
ENSG00000101074
ENSG00000102104
ENSG00000111245
ENSG00000121898
ENSG00000128011
ENSG00000130182
ENSG00000131142
ENSG00000132692
ENSG00000143006
ENSG00000143194
ENSG00000147394
ENSG00000148204
ENSG00000157322
ENSG00000159650
ENSG00000162571
ENSG00000162592
ENSG00000167914
ENSG00000168065
ENSG00000170423
ENSG00000178722
ENSG00000180438
ENSG00000181408
ENSG00000183914
ENSG00000184599
ENSG00000185972
ENSG00000187569
ENSG00000188716
ENSG00000188937
ENSG00000205864
ENSG00000206026
ENSG00000215045
ENSG00000215131

## Sheet: Kidney Cancer
Supplementary Table 4. List of hypermethylated-promoter genes in kidney cancer that use distal CGIs as alternative promoters.
GeneID
ENSG00000007314
ENSG00000009724
ENSG00000015592
ENSG00000017483
ENSG00000017621
ENSG00000070985
ENSG00000078814
ENSG00000106536
ENSG00000112619
ENSG00000122592
ENSG00000130812
ENSG00000142959
ENSG00000144596
ENSG00000148204
ENSG00000149488
ENSG00000153531
ENSG00000154783
ENSG00000156006
ENSG00000160973
ENSG00000161180
ENSG00000163221
ENSG00000166220
ENSG00000167914
ENSG00000169885
ENSG00000174788
ENSG00000176678
ENSG00000176723
ENSG00000177238
ENSG00000178602
ENSG00000180438
ENSG00000181652
ENSG00000184599
ENSG00000187010
ENSG00000187492
ENSG00000188716
ENSG00000188888
ENSG00000198173
ENSG00000204003
ENSG00000205832
