# Supplementary material for: Distal CpG islands can serve as alternative promoters to transcribe genes with silenced proximal promoters
Source: HighWire-hosted journal article supplement (doi:10.1101/gr.212050.116), 2017-02-21
Supplement: Supplemental_Table_S5.xlsx [file Supplemental_Table_S5.xlsx]

## Sheet: Sheet1
Supplementary Table 5. A GO functional annotation of all methylated-promoter genes in breast cancer, that are differentially expressed from their normal counterparts across 80 matched samples, and display usage of distal CGI alternative promoters.
ID	Gene Name	Species	BBID	BIOCARTA	COG_ONTOLOGY	GOTERM_BP_FAT	GOTERM_CC_FAT	GOTERM_MF_FAT	INTERPRO	KEGG_PATHWAY	OMIM_DISEASE	PIR_SUPERFAMILY	SMART	SP_PIR_KEYWORDS	UP_SEQ_FEATURE
ENSG00000173157	ADAM metallopeptidase with thrombospondin type 1 motif, 20	Homo sapiens				GO:0006508~proteolysis,GO:0009967~positive regulation of signal transduction,GO:0010647~positive regulation of cell communication,GO:0010941~regulation of cell death,GO:0030198~extracellular matrix organization,GO:0042981~regulation of apoptosis,GO:0043062~extracellular structure organization,GO:0043066~negative regulation of apoptosis,GO:0043067~regulation of programmed cell death,GO:0043069~neg…	GO:0005576~extracellular region,GO:0005578~proteinaceous extracellular matrix,GO:0005615~extracellular space,GO:0031012~extracellular matrix,GO:0044421~extracellular region part,	GO:0004175~endopeptidase activity,GO:0004222~metalloendopeptidase activity,GO:0008233~peptidase activity,GO:0008237~metallopeptidase activity,GO:0008270~zinc ion binding,GO:0043167~ion binding,GO:0043169~cation binding,GO:0046872~metal ion binding,GO:0046914~transition metal ion binding,GO:0070011~peptidase activity, acting on L-amino acid peptides,	IPR000884:Thrombospondin, type 1 repeat,IPR001590:Peptidase M12B, ADAM/reprolysin,IPR002870:Peptidase M12B, propeptide,IPR006025:Peptidase M, neutral zinc metallopeptidases, zinc-binding site,IPR010294:ADAM-TS Spacer 1,IPR012314:Peptidase M12B, GON-ADAMTSs,IPR013273:Peptidase M12B, ADAM-TS,IPR018358:Disintegrin, conserved site,				SM00209:TSP1,	alternative splicing,cleavage on pair of basic residues,complete proteome,disulfide bond,extracellular matrix,glycoprotein,hydrolase,metal-binding,metalloprotease,polymorphism,Protease,repeat,Secreted,signal,zinc,zymogen,	chain:A disintegrin and metalloproteinase with thrombospondin motifs 20,compositionally biased region:Cys-rich,disulfide bond,domain:Disintegrin,domain:GON,domain:Peptidase M12B,domain:TSP type-1 1,domain:TSP type-1 10,domain:TSP type-1 11,domain:TSP type-1 12,domain:TSP type-1 13,domain:TSP type-1 14,domain:TSP type-1 15,domain:TSP type-1 2,domain:TSP type-1 3,domain:TSP type-1 4,domain:TSP type…
ENSG00000144746	ADP-ribosylation-like factor 6 interacting protein 5	Homo sapiens				GO:0006811~ion transport,GO:0006820~anion transport,GO:0006865~amino acid transport,GO:0015711~organic anion transport,GO:0015800~acidic amino acid transport,GO:0015813~L-glutamate transport,GO:0015837~amine transport,GO:0015849~organic acid transport,GO:0046942~carboxylic acid transport,GO:0051051~negative regulation of transport,	GO:0005783~endoplasmic reticulum,GO:0016021~integral to membrane,GO:0031224~intrinsic to membrane,	GO:0008022~protein C-terminus binding,	IPR004895:Prenylated rab acceptor PRA1,					acetylation,complete proteome,cytoplasm,direct protein sequencing,endoplasmic reticulum,membrane,transmembrane,	chain:PRA1 family protein 3,modified residue,region of interest:Targeting to endoplasmic reticulum membrane,sequence conflict,topological domain:Cytoplasmic,transmembrane region,
ENSG00000133612	ArfGAP with GTPase domain, ankyrin repeat and PH domain 3	Homo sapiens				GO:0006886~intracellular protein transport,GO:0007242~intracellular signaling cascade,GO:0007264~small GTPase mediated signal transduction,GO:0008104~protein localization,GO:0015031~protein transport,GO:0016192~vesicle-mediated transport,GO:0032012~regulation of ARF protein signal transduction,GO:0032312~regulation of ARF GTPase activity,GO:0032318~regulation of Ras GTPase activity,GO:0034613~cel…	GO:0030117~membrane coat,GO:0030118~clathrin coat,GO:0030119~AP-type membrane coat adaptor complex,GO:0030131~clathrin adaptor complex,GO:0048475~coated membrane,	GO:0000166~nucleotide binding,GO:0003924~GTPase activity,GO:0005083~small GTPase regulator activity,GO:0005096~GTPase activator activity,GO:0005525~GTP binding,GO:0008047~enzyme activator activity,GO:0008060~ARF GTPase activator activity,GO:0008270~zinc ion binding,GO:0017076~purine nucleotide binding,GO:0019001~guanyl nucleotide binding,GO:0030695~GTPase regulator activity,GO:0032553~ribonucleot…	IPR001164:Arf GTPase activating protein,IPR001806:Ras GTPase,IPR001849:Pleckstrin homology,IPR002110:Ankyrin,IPR008968:Clathrin adaptor, mu subunit, C-terminal,IPR011993:Pleckstrin homology-type,IPR013684:Miro-like,IPR018240:Clathrin adaptor, mu subunit, conserved site,				SM00105:ArfGap,SM00233:PH,SM00248:ANK,	3d-structure,alternative splicing,ank repeat,complete proteome,cytoplasm,gtp-binding,GTPase activation,metal-binding,nucleotide-binding,phosphoprotein,repeat,zinc,zinc-finger,	chain:Arf-GAP with GTPase, ANK repeat and PH domain-containing protein 3,domain:Arf-GAP,domain:PH,helix,modified residue,nucleotide phosphate-binding region:GTP,region of interest:Small GTPase-like,repeat:ANK 1,repeat:ANK 2,repeat:ANK 3,splice variant,strand,turn,zinc finger region:C4-type,
ENSG00000172530	BTG3 associated nuclear protein	Homo sapiens				GO:0006325~chromatin organization,GO:0006350~transcription,GO:0007049~cell cycle,GO:0016568~chromatin modification,GO:0045449~regulation of transcription,GO:0051276~chromosome organization,		GO:0003677~DNA binding,	IPR018379:BEN domain,			PIRSF023944:PIRSF023944,		alternative splicing,cell cycle,chromatin regulator,coiled coil,complete proteome,developmental protein,dna-binding,nucleus,repressor,Transcription,transcription regulation,tumor suppressor,	chain:Protein BANP,compositionally biased region:Gln-rich,domain:BEN,region of interest:DNA-binding,region of interest:Interaction with CUX1 and HDAC1,region of interest:Necessary and sufficient for TP53 activation,sequence conflict,splice variant,
ENSG00000122507	Bardet-Biedl syndrome 9	Homo sapiens			Cell envelope biogenesis, outer membrane,	GO:0007600~sensory perception,GO:0007601~visual perception,GO:0045444~fat cell differentiation,GO:0050877~neurological system process,GO:0050890~cognition,GO:0050953~sensory perception of light stimulus,	GO:0005813~centrosome,GO:0005815~microtubule organizing center,GO:0005856~cytoskeleton,GO:0005886~plasma membrane,GO:0005929~cilium,GO:0015630~microtubule cytoskeleton,GO:0031253~cell projection membrane,GO:0034464~BBSome,GO:0042995~cell projection,GO:0043228~non-membrane-bounded organelle,GO:0043232~intracellular non-membrane-bounded organelle,GO:0044430~cytoskeletal part,GO:0044441~cilium part,…				Bardet-Biedl syndrome 9,			alternative splicing,Bardet-Biedl syndrome,cell membrane,cell projection,chromosomal rearrangement,cilium,complete proteome,cytoplasm,cytoskeleton,disease mutation,membrane,obesity,polymorphism,sensory transduction,vision,	chain:Protein PTHB1,sequence conflict,sequence variant,splice variant,
ENSG00000157322	C-type lectin domain family 18, member A	Homo sapiens					GO:0005576~extracellular region,	GO:0005529~sugar binding,GO:0030246~carbohydrate binding,	IPR000742:EGF-like, type 3,IPR001283:Allergen V5/Tpx-1 related,IPR001304:C-type lectin,IPR006210:EGF-like,IPR013032:EGF-like region, conserved site,IPR014044:SCP-like extracellular,IPR016186:C-type lectin-like,IPR018378:C-type lectin, conserved site,				SM00034:CLECT,SM00181:EGF,SM00198:SCP,	alternative splicing,complete proteome,disulfide bond,egf-like domain,glycoprotein,Lectin,polymorphism,Secreted,signal,	chain:C-type lectin domain family 18 member A,chain:C-type lectin domain family 18 member C,disulfide bond,domain:C-type lectin,domain:EGF-like,domain:SCP,glycosylation site:N-linked (GlcNAc...),sequence conflict,sequence variant,signal peptide,splice variant,
ENSG00000221869	CCAAT/enhancer binding protein (C/EBP), delta	Homo sapiens				GO:0006350~transcription,GO:0006351~transcription, DNA-dependent,GO:0006355~regulation of transcription, DNA-dependent,GO:0006366~transcription from RNA polymerase II promoter,GO:0032774~RNA biosynthetic process,GO:0045449~regulation of transcription,GO:0051252~regulation of RNA metabolic process,		GO:0003677~DNA binding,GO:0003700~transcription factor activity,GO:0030528~transcription regulator activity,GO:0043565~sequence-specific DNA binding,GO:0046983~protein dimerization activity,	IPR004827:Basic-leucine zipper (bZIP) transcription factor,IPR011700:Basic leucine zipper,IPR016468:CCAAT/enhancer-binding,			PIRSF005879:CCAAT/enhancer-binding,PIRSF005879:CCAAT/enhancer-binding protein,	SM00338:BRLZ,	activator,complete proteome,dna-binding,isopeptide bond,leucine zipper,nucleus,polymorphism,Transcription,transcription regulation,ubl conjugation,	chain:CCAAT/enhancer-binding protein delta,cross-link:Glycyl lysine isopeptide (Lys-Gly) (interchain with G-Cter in SUMO),DNA-binding region:Basic motif,domain:Leucine-zipper,mutagenesis site,sequence conflict,sequence variant,
ENSG00000141030	COP9 constitutive photomorphogenic homolog subunit 3 (Arabidopsis)	Homo sapiens				GO:0001701~in utero embryonic development,GO:0009314~response to radiation,GO:0009416~response to light stimulus,GO:0009628~response to abiotic stimulus,GO:0009792~embryonic development ending in birth or egg hatching,GO:0043009~chordate embryonic development,	GO:0008180~signalosome,		IPR000717:Proteasome component region PCI,IPR011991:Winged helix repressor DNA-binding,				SM00088:PINT,	acetylation,complete proteome,cytoplasm,direct protein sequencing,nucleus,phosphoprotein,signalosome,	chain:COP9 signalosome complex subunit 3,domain:PCI,modified residue,
ENSG00000132153	DEAH (Asp-Glu-Ala-His) box polypeptide 30	Homo sapiens					GO:0005739~mitochondrion,GO:0005759~mitochondrial matrix,GO:0009295~nucleoid,GO:0031974~membrane-enclosed lumen,GO:0031980~mitochondrial lumen,GO:0042645~mitochondrial nucleoid,GO:0043228~non-membrane-bounded organelle,GO:0043232~intracellular non-membrane-bounded organelle,GO:0043233~organelle lumen,GO:0044429~mitochondrial part,GO:0070013~intracellular organelle lumen,	GO:0000166~nucleotide binding,GO:0001882~nucleoside binding,GO:0001883~purine nucleoside binding,GO:0003723~RNA binding,GO:0004386~helicase activity,GO:0005524~ATP binding,GO:0008026~ATP-dependent helicase activity,GO:0016887~ATPase activity,GO:0017076~purine nucleotide binding,GO:0030554~adenyl nucleotide binding,GO:0032553~ribonucleotide binding,GO:0032555~purine ribonucleotide binding,GO:00325…	IPR001650:DNA/RNA helicase, C-terminal,IPR002464:DNA/RNA helicase, ATP-dependent, DEAH-box type, conserved site,IPR007502:Helicase-associated region,IPR011709:Region of unknown function DUF1605,IPR014001:DEAD-like helicase, N-terminal,IPR014021:Helicase, superfamily 1 and 2, ATP-binding,				SM00487:DEXDc,SM00490:HELICc,	3d-structure,alternative splicing,atp-binding,complete proteome,cytoplasm,helicase,hydrolase,mitochondrion,nucleotide-binding,phosphoprotein,rna-binding,	chain:Putative ATP-dependent RNA helicase DHX30,compositionally biased region:Poly-Glu,domain:DRBM,domain:Helicase ATP-binding,domain:Helicase C-terminal,helix,modified residue,nucleotide phosphate-binding region:ATP,sequence conflict,short sequence motif:DEAH box,splice variant,strand,turn,
ENSG00000103423	DnaJ (Hsp40) homolog, subfamily A, member 3	Homo sapiens		h_tidPathway:Chaperones modulate interferon Signaling Pathway,		GO:0000002~mitochondrial genome maintenance,GO:0001775~cell activation,GO:0001776~leukocyte homeostasis,GO:0001959~regulation of cytokine-mediated signaling pathway,GO:0001960~negative regulation of cytokine-mediated signaling pathway,GO:0002260~lymphocyte homeostasis,GO:0002520~immune system development,GO:0002521~leukocyte differentiation,GO:0002684~positive regulation of immune system process,…	GO:0005739~mitochondrion,GO:0005759~mitochondrial matrix,GO:0005829~cytosol,GO:0005856~cytoskeleton,GO:0005884~actin filament,GO:0009295~nucleoid,GO:0015629~actin cytoskeleton,GO:0031974~membrane-enclosed lumen,GO:0031980~mitochondrial lumen,GO:0042645~mitochondrial nucleoid,GO:0043228~non-membrane-bounded organelle,GO:0043232~intracellular non-membrane-bounded organelle,GO:0043233~organelle lume…	GO:0005083~small GTPase regulator activity,GO:0005133~interferon-gamma receptor binding,GO:0008134~transcription factor binding,GO:0008270~zinc ion binding,GO:0019899~enzyme binding,GO:0019900~kinase binding,GO:0019901~protein kinase binding,GO:0030695~GTPase regulator activity,GO:0031072~heat shock protein binding,GO:0043167~ion binding,GO:0043169~cation binding,GO:0046872~metal ion binding,GO:0…	IPR001305:Heat shock protein DnaJ, cysteine-rich region,IPR001623:Heat shock protein DnaJ, N-terminal,IPR002939:Chaperone DnaJ, C-terminal,IPR003095:Heat shock protein DnaJ,IPR015609:Molecular chaperone, heat shock protein, Hsp40, DnaJ,IPR018253:Heat shock protein DnaJ, conserved site,				SM00271:DnaJ,	3d-structure,alternative splicing,Apoptosis,Chaperone,complete proteome,metal-binding,mitochondrion,phosphoprotein,polymorphism,repeat,transit peptide,zinc,zinc-finger,	chain:DnaJ homolog subfamily A member 3, mitochondrial,domain:J,helix,metal ion-binding site:Zinc 1,metal ion-binding site:Zinc 2,modified residue,mutagenesis site,repeat:CXXCXGXG motif,sequence conflict,sequence variant,splice variant,strand,transit peptide:Mitochondrion,turn,zinc finger region:CR-type,
ENSG00000102034	E74-like factor 4 (ets domain transcription factor)	Homo sapiens				GO:0001775~cell activation,GO:0001787~natural killer cell proliferation,GO:0001866~NK T cell proliferation,GO:0006350~transcription,GO:0006355~regulation of transcription, DNA-dependent,GO:0006357~regulation of transcription from RNA polymerase II promoter,GO:0008283~cell proliferation,GO:0009891~positive regulation of biosynthetic process,GO:0010557~positive regulation of macromolecule biosynthe…	GO:0005654~nucleoplasm,GO:0016604~nuclear body,GO:0016605~PML body,GO:0031974~membrane-enclosed lumen,GO:0031981~nuclear lumen,GO:0043233~organelle lumen,GO:0044451~nucleoplasm part,GO:0070013~intracellular organelle lumen,	GO:0003677~DNA binding,GO:0003700~transcription factor activity,GO:0016563~transcription activator activity,GO:0030528~transcription regulator activity,GO:0043565~sequence-specific DNA binding,	IPR000418:Ets,IPR011991:Winged helix repressor DNA-binding,				SM00413:ETS,	activator,complete proteome,dna-binding,nucleus,phosphoprotein,Transcription,transcription regulation,	chain:ETS-related transcription factor Elf-4,DNA-binding region:ETS,modified residue,region of interest:RUNX1-binding,sequence conflict,
ENSG00000133216	EPH receptor B2	Homo sapiens				GO:0000902~cell morphogenesis,GO:0000904~cell morphogenesis involved in differentiation,GO:0001654~eye development,GO:0006468~protein amino acid phosphorylation,GO:0006793~phosphorus metabolic process,GO:0006796~phosphate metabolic process,GO:0006928~cell motion,GO:0007166~cell surface receptor linked signal transduction,GO:0007167~enzyme linked receptor protein signaling pathway,GO:0007169~trans…	GO:0005886~plasma membrane,GO:0005887~integral to plasma membrane,GO:0016021~integral to membrane,GO:0031224~intrinsic to membrane,GO:0031226~intrinsic to plasma membrane,GO:0043025~cell soma,GO:0044459~plasma membrane part,	GO:0000166~nucleotide binding,GO:0001882~nucleoside binding,GO:0001883~purine nucleoside binding,GO:0004672~protein kinase activity,GO:0004713~protein tyrosine kinase activity,GO:0004714~transmembrane receptor protein tyrosine kinase activity,GO:0005003~ephrin receptor activity,GO:0005524~ATP binding,GO:0017076~purine nucleotide binding,GO:0030554~adenyl nucleotide binding,GO:0032553~ribonucleoti…	IPR000719:Protein kinase, core,IPR001090:Ephrin receptor, ligand binding,IPR001245:Tyrosine protein kinase,IPR001426:Receptor tyrosine kinase, class V, conserved site,IPR001660:Sterile alpha motif SAM,IPR003961:Fibronectin, type III,IPR003962:Fibronectin, type III subdomain,IPR008266:Tyrosine protein kinase, active site,IPR008957:Fibronectin, type III-like fold,IPR013032:EGF-like region, conserve…	hsa04360:Axon guidance,	Prostate cancer, progression and metastasis of,	PIRSF000666:TyrPK_ephrin_receptor,	SM00060:FN3,SM00219:TyrKc,SM00454:SAM,SM00615:EPH_lbd,	3d-structure,alternative splicing,atp-binding,complete proteome,disease mutation,glycoprotein,kinase,membrane,nucleotide-binding,phosphoprotein,polymorphism,receptor,repeat,signal,transferase,transmembrane,tumor suppressor,tyrosine-protein kinase,	active site:Proton acceptor,binding site:ATP,chain:Ephrin type-B receptor 2,compositionally biased region:Cys-rich,domain:Fibronectin type-III 1,domain:Fibronectin type-III 2,domain:Protein kinase,domain:SAM,glycosylation site:N-linked (GlcNAc...),helix,modified residue,nucleotide phosphate-binding region:ATP,sequence conflict,sequence variant,short sequence motif:PDZ-binding (in isoform 2),signa…
ENSG00000132591	Era G-protein-like 1 (E. coli)	Homo sapiens						GO:0000166~nucleotide binding,GO:0003723~RNA binding,GO:0005525~GTP binding,GO:0017076~purine nucleotide binding,GO:0019001~guanyl nucleotide binding,GO:0032553~ribonucleotide binding,GO:0032555~purine ribonucleotide binding,GO:0032561~guanyl ribonucleotide binding,	IPR002917:GTP-binding protein, HSR1-related,IPR005225:Small GTP-binding protein,IPR005662:GTP-binding protein Era,IPR006073:GTP1/OBG,IPR015946:K homology-like, alpha/beta,					alternative splicing,complete proteome,gtp-binding,nucleotide-binding,rna-binding,	chain:GTP-binding protein era homolog,domain:KH type-2,nucleotide phosphate-binding region:GTP,sequence conflict,splice variant,
ENSG00000187741	Fanconi anemia, complementation group A	Homo sapiens		h_atrbrcaPathway:Role of BRCA1, BRCA2 and ATR in Cancer Susceptibility,h_bard1Pathway:BRCA1-dependent Ub-ligase activity,		GO:0000279~M phase,GO:0003006~reproductive developmental process,GO:0006259~DNA metabolic process,GO:0006281~DNA repair,GO:0006461~protein complex assembly,GO:0006974~response to DNA damage stimulus,GO:0007049~cell cycle,GO:0007126~meiosis,GO:0007140~male meiosis,GO:0007548~sex differentiation,GO:0008406~gonad development,GO:0008584~male gonad development,GO:0008585~female gonad development,GO:00…			IPR003516:Fanconi anaemia group A protein,		Fanconi anemia, complementation group A,			alternative splicing,complete proteome,cytoplasm,disease mutation,DNA damage,dna repair,Fanconi anemia,nucleus,phosphoprotein,polymorphism,	chain:Fanconi anemia group A protein,modified residue,sequence variant,short sequence motif:Nuclear localization signal,splice variant,
ENSG00000125812	GDNF-inducible zinc finger protein 1	Homo sapiens			General function prediction only,	GO:0000122~negative regulation of transcription from RNA polymerase II promoter,GO:0001655~urogenital system development,GO:0001656~metanephros development,GO:0001657~ureteric bud development,GO:0001658~branching involved in ureteric bud morphogenesis,GO:0001763~morphogenesis of a branching structure,GO:0001822~kidney development,GO:0002009~morphogenesis of an epithelium,GO:0006350~transcription,…		GO:0003677~DNA binding,GO:0008270~zinc ion binding,GO:0043167~ion binding,GO:0043169~cation binding,GO:0046872~metal ion binding,GO:0046914~transition metal ion binding,	IPR000210:BTB/POZ-like,IPR007087:Zinc finger, C2H2-type,IPR011333:BTB/POZ fold,IPR013069:BTB/POZ,IPR013087:Zinc finger, C2H2-type/integrase, DNA-binding,IPR015880:Zinc finger, C2H2-like,				SM00225:BTB,SM00355:ZnF_C2H2,	complete proteome,dna-binding,metal-binding,nucleus,polymorphism,repeat,Transcription,transcription regulation,zinc,zinc-finger,	chain:GDNF-inducible zinc finger protein 1,domain:BTB,sequence conflict,sequence variant,zinc finger region:C2H2-type 1,zinc finger region:C2H2-type 10,zinc finger region:C2H2-type 2,zinc finger region:C2H2-type 3,zinc finger region:C2H2-type 4,zinc finger region:C2H2-type 5,zinc finger region:C2H2-type 6,zinc finger region:C2H2-type 7,zinc finger region:C2H2-type 8,zinc finger region:C2H2-type 9,
ENSG00000131153	GINS complex subunit 2 (Psf2 homolog)	Homo sapiens				GO:0006259~DNA metabolic process,GO:0006260~DNA replication,			IPR007257:GINS complex, Psf2 component,IPR016906:GINS complex, PSF2 component, subgroup,			PIRSF028998:GINS complex, PSF2 component,PIRSF028998:GINS_Psf2_subgr,		3d-structure,acetylation,complete proteome,dna replication,nucleus,phosphoprotein,	chain:DNA replication complex GINS protein psf2,helix,modified residue,strand,
ENSG00000214367	HAUS augmin-like complex, subunit 3	Homo sapiens				GO:0000087~M phase of mitotic cell cycle,GO:0000226~microtubule cytoskeleton organization,GO:0000278~mitotic cell cycle,GO:0000279~M phase,GO:0000280~nuclear division,GO:0007010~cytoskeleton organization,GO:0007017~microtubule-based process,GO:0007049~cell cycle,GO:0007051~spindle organization,GO:0007067~mitosis,GO:0022402~cell cycle process,GO:0022403~cell cycle phase,GO:0031023~microtubule orga…	GO:0005813~centrosome,GO:0005815~microtubule organizing center,GO:0005819~spindle,GO:0005856~cytoskeleton,GO:0005874~microtubule,GO:0005875~microtubule associated complex,GO:0015630~microtubule cytoskeleton,GO:0043228~non-membrane-bounded organelle,GO:0043232~intracellular non-membrane-bounded organelle,GO:0044430~cytoskeletal part,GO:0070652~HAUS complex,							cell cycle,cell division,coiled coil,complete proteome,cytoplasm,cytoskeleton,microtubule,mitosis,polymorphism,	chain:HAUS augmin-like complex subunit 3,sequence variant,
ENSG00000166189	Hermansky-Pudlak syndrome 6	Homo sapiens				GO:0007596~blood coagulation,GO:0007599~hemostasis,GO:0009611~response to wounding,GO:0030318~melanocyte differentiation,GO:0042060~wound healing,GO:0043473~pigmentation,GO:0048066~pigmentation during development,GO:0050817~coagulation,GO:0050878~regulation of body fluid levels,GO:0050931~pigment cell differentiation,			IPR017218:BLOC-2 complex, Hps6 subunit,		Hermansky-Pudlak syndrome 6,	PIRSF037476:BLOC-2 complex, Hps6 subunit,PIRSF037476:BLOC-2_complex_Hps6,		Albinism,complete proteome,cytoplasm,endoplasmic reticulum,endosome,Hermansky-Pudlak syndrome,membrane,microsome,	chain:Hermansky-Pudlak syndrome 6 protein,
ENSG00000123485	Holliday junction recognition protein	Homo sapiens				GO:0006323~DNA packaging,GO:0006325~chromatin organization,GO:0006333~chromatin assembly or disassembly,GO:0006334~nucleosome assembly,GO:0006336~DNA replication-independent nucleosome assembly,GO:0006338~chromatin remodeling,GO:0007049~cell cycle,GO:0007059~chromosome segregation,GO:0016568~chromatin modification,GO:0031055~chromatin remodeling at centromere,GO:0031497~chromatin assembly,GO:0034…	GO:0000775~chromosome, centromeric region,GO:0000776~kinetochore,GO:0000777~condensed chromosome kinetochore,GO:0000779~condensed chromosome, centromeric region,GO:0000793~condensed chromosome,GO:0005694~chromosome,GO:0005730~nucleolus,GO:0031974~membrane-enclosed lumen,GO:0031981~nuclear lumen,GO:0043228~non-membrane-bounded organelle,GO:0043232~intracellular non-membrane-bounded organelle,GO:00…	GO:0003677~DNA binding,GO:0042393~histone binding,						alternative splicing,cell cycle,centromere,Chaperone,chromosomal protein,complete proteome,dna-binding,nucleus,phosphoprotein,polymorphism,	chain:Holliday junction recognition protein,modified residue,mutagenesis site,sequence conflict,sequence variant,splice variant,
ENSG00000198589	LPS-responsive vesicle trafficking, beach and anchor containing	Homo sapiens					GO:0000323~lytic vacuole,GO:0005764~lysosome,GO:0005773~vacuole,GO:0005783~endoplasmic reticulum,GO:0016021~integral to membrane,GO:0031224~intrinsic to membrane,		IPR000409:Beige/BEACH,IPR001680:WD40 repeat,IPR010508:Protein of unknown function DUF1088,IPR015943:WD40/YVTN repeat-like,IPR019775:WD40 repeat, conserved site,IPR019781:WD40 repeat, subgroup,				SM00320:WD40,	3d-structure,acetylation,alternative splicing,cell membrane,coiled coil,complete proteome,endoplasmic reticulum,golgi apparatus,lysosome,membrane,phosphoprotein,polymorphism,repeat,transmembrane,wd repeat,	chain:Lipopolysaccharide-responsive and beige- like anchor protein,compositionally biased region:Poly-Arg,domain:BEACH,helix,modified residue,repeat:WD 1,repeat:WD 2,repeat:WD 3,repeat:WD 4,repeat:WD 5,repeat:WD 6,sequence conflict,sequence variant,splice variant,strand,transmembrane region,turn,
ENSG00000196199	M-phase phosphoprotein 8	Homo sapiens				GO:0006325~chromatin organization,GO:0006333~chromatin assembly or disassembly,GO:0007049~cell cycle,GO:0051276~chromosome organization,	GO:0000785~chromatin,GO:0005694~chromosome,GO:0043228~non-membrane-bounded organelle,GO:0043232~intracellular non-membrane-bounded organelle,GO:0044427~chromosomal part,	GO:0003682~chromatin binding,	IPR000953:Chromo domain,IPR002110:Ankyrin,				SM00248:ANK,SM00298:CHROMO,	acetylation,alternative splicing,ank repeat,complete proteome,nucleus,phosphoprotein,repeat,	chain:M-phase phosphoprotein 8,compositionally biased region:Lys-rich,domain:Chromo,modified residue,repeat:ANK 1,repeat:ANK 2,repeat:ANK 3,repeat:ANK 4,sequence conflict,splice variant,
ENSG00000164077	MON1 homolog A (yeast)	Homo sapiens				GO:0006873~cellular ion homeostasis,GO:0006879~cellular iron ion homeostasis,GO:0008104~protein localization,GO:0009306~protein secretion,GO:0015031~protein transport,GO:0019725~cellular homeostasis,GO:0030003~cellular cation homeostasis,GO:0030005~cellular di-, tri-valent inorganic cation homeostasis,GO:0032940~secretion by cell,GO:0042592~homeostatic process,GO:0045184~establishment of protein …			IPR004353:Vacuolar fusion protein MON1,					alternative splicing,complete proteome,phosphoprotein,	chain:Vacuolar fusion protein MON1 homolog A,modified residue,splice variant,
ENSG00000189043	NADH dehydrogenase (ubiquinone) 1 alpha subcomplex, 4, 9kDa	Homo sapiens				GO:0006091~generation of precursor metabolites and energy,GO:0006119~oxidative phosphorylation,GO:0006120~mitochondrial electron transport, NADH to ubiquinone,GO:0006793~phosphorus metabolic process,GO:0006796~phosphate metabolic process,GO:0015980~energy derivation by oxidation of organic compounds,GO:0016310~phosphorylation,GO:0022900~electron transport chain,GO:0022904~respiratory electron tra…	GO:0005739~mitochondrion,GO:0005740~mitochondrial envelope,GO:0005743~mitochondrial inner membrane,GO:0005746~mitochondrial respiratory chain,GO:0005747~mitochondrial respiratory chain complex I,GO:0019866~organelle inner membrane,GO:0030964~NADH dehydrogenase complex,GO:0031090~organelle membrane,GO:0031966~mitochondrial membrane,GO:0031967~organelle envelope,GO:0031975~envelope,GO:0044429~mitoc…	GO:0003954~NADH dehydrogenase activity,GO:0008137~NADH dehydrogenase (ubiquinone) activity,GO:0016651~oxidoreductase activity, acting on NADH or NADPH,GO:0016655~oxidoreductase activity, acting on NADH or NADPH, quinone or similar compound as acceptor,GO:0050136~NADH dehydrogenase (quinone) activity,	IPR019550:NADH dehydrogenase [ubiquinone] 1 alpha subcomplex subunit 4,	hsa00190:Oxidative phosphorylation,hsa05010:Alzheimer's disease,hsa05012:Parkinson's disease,hsa05016:Huntington's disease,		PIRSF037639:NADH dehydrogenase [ubiquinone] (complex I), alpha subcomplex subunit 4,		acetylation,complete proteome,electron transport,membrane,mitochondrion,mitochondrion inner membrane,respiratory chain,transport,	chain:NADH dehydrogenase [ubiquinone] 1 alpha subcomplex subunit 4,modified residue,
ENSG00000083642	PDS5, regulator of cohesion maintenance, homolog B (S. cerevisiae)	Homo sapiens				GO:0000070~mitotic sister chromatid segregation,GO:0000087~M phase of mitotic cell cycle,GO:0000278~mitotic cell cycle,GO:0000279~M phase,GO:0000280~nuclear division,GO:0000819~sister chromatid segregation,GO:0007049~cell cycle,GO:0007059~chromosome segregation,GO:0007062~sister chromatid cohesion,GO:0007064~mitotic sister chromatid cohesion,GO:0007067~mitosis,GO:0008283~cell proliferation,GO:000…	GO:0000785~chromatin,GO:0005694~chromosome,GO:0043228~non-membrane-bounded organelle,GO:0043232~intracellular non-membrane-bounded organelle,GO:0044427~chromosomal part,	GO:0000166~nucleotide binding,GO:0001882~nucleoside binding,GO:0001883~purine nucleoside binding,GO:0003677~DNA binding,GO:0005524~ATP binding,GO:0017076~purine nucleotide binding,GO:0030554~adenyl nucleotide binding,GO:0032553~ribonucleotide binding,GO:0032555~purine ribonucleotide binding,GO:0032559~adenyl ribonucleotide binding,GO:0042802~identical protein binding,	IPR000357:HEAT,IPR017956:AT hook, DNA-binding, conserved site,				SM00384:AT_hook,	acetylation,alternative splicing,cell cycle,cell division,complete proteome,mitosis,nucleus,phosphoprotein,repeat,	chain:Sister chromatid cohesion protein PDS5 homolog B,DNA-binding region:A.T hook 1,DNA-binding region:A.T hook 2,DNA-binding region:A.T hook 3,modified residue,repeat:HEAT,sequence conflict,splice variant,
ENSG00000106536	POU class 6 homeobox 2	Homo sapiens				GO:0001709~cell fate determination,GO:0006350~transcription,GO:0006351~transcription, DNA-dependent,GO:0006355~regulation of transcription, DNA-dependent,GO:0006366~transcription from RNA polymerase II promoter,GO:0007402~ganglion mother cell fate determination,GO:0007600~sensory perception,GO:0007601~visual perception,GO:0032774~RNA biosynthetic process,GO:0045165~cell fate commitment,GO:0045449…		GO:0003677~DNA binding,GO:0003700~transcription factor activity,GO:0030528~transcription regulator activity,GO:0043565~sequence-specific DNA binding,	IPR000327:POU-specific,IPR001356:Homeobox,IPR012287:Homeodomain-related,IPR013847:POU,IPR017970:Homeobox, conserved site,		Wilms tumor susceptibility-5,	PIRSF002631:POU domain class 6 transcription factor 2,	SM00352:POU,SM00389:HOX,	alternative splicing,complete proteome,disease mutation,dna-binding,Homeobox,nucleus,Transcription,transcription regulation,	chain:POU domain, class 6, transcription factor 2,compositionally biased region:Gln-rich,compositionally biased region:Pro-rich,compositionally biased region:Ser-rich,DNA-binding region:Homeobox,domain:POU-specific,sequence conflict,sequence variant,splice variant,
ENSG00000128563	PRKR interacting protein 1 (IL11 inducible)	Homo sapiens				GO:0006469~negative regulation of protein kinase activity,GO:0010563~negative regulation of phosphorus metabolic process,GO:0019220~regulation of phosphate metabolic process,GO:0033673~negative regulation of kinase activity,GO:0042325~regulation of phosphorylation,GO:0042326~negative regulation of phosphorylation,GO:0043086~negative regulation of catalytic activity,GO:0043549~regulation of kinase…	GO:0005730~nucleolus,GO:0031974~membrane-enclosed lumen,GO:0031981~nuclear lumen,GO:0043228~non-membrane-bounded organelle,GO:0043232~intracellular non-membrane-bounded organelle,GO:0043233~organelle lumen,GO:0070013~intracellular organelle lumen,	GO:0003723~RNA binding,GO:0003725~double-stranded RNA binding,GO:0004857~enzyme inhibitor activity,GO:0004860~protein kinase inhibitor activity,GO:0019207~kinase regulator activity,GO:0019210~kinase inhibitor activity,GO:0019887~protein kinase regulator activity,GO:0019899~enzyme binding,GO:0019900~kinase binding,GO:0019901~protein kinase binding,	IPR009548:Protein of unknown function DUF1168,					coiled coil,complete proteome,nucleus,phosphoprotein,polymorphism,	chain:PRKR-interacting protein 1,compositionally biased region:Poly-Glu,compositionally biased region:Poly-Ser,modified residue,region of interest:Interaction with EIF2AK2,region of interest:Required for nuclear localization,region of interest:Required for RNA-binding,sequence variant,
ENSG00000174788	Purkinje cell protein 2	Homo sapiens						GO:0005085~guanyl-nucleotide exchange factor activity,GO:0005096~GTPase activator activity,GO:0008047~enzyme activator activity,GO:0030695~GTPase regulator activity,GO:0060589~nucleoside-triphosphatase regulator activity,	IPR003109:GoLoco motif,				SM00390:GoLoco,	complete proteome,repeat,	chain:Purkinje cell protein 2 homolog,domain:GoLoco 1,domain:GoLoco 2,
ENSG00000101074	R3H domain containing-like	Homo sapiens					GO:0005576~extracellular region,	GO:0004857~enzyme inhibitor activity,GO:0030414~peptidase inhibitor activity,	IPR001283:Allergen V5/Tpx-1 related,IPR014044:SCP-like extracellular,IPR018244:Allergen V5/Tpx-1 related, conserved site,				SM00198:SCP,	complete proteome,glycoprotein,polymorphism,protease inhibitor,Secreted,signal,	chain:Peptidase inhibitor R3HDML,glycosylation site:N-linked (GlcNAc...),sequence variant,signal peptide,
ENSG00000011454	RAB GTPase activating protein 1	Homo sapiens				GO:0007049~cell cycle,GO:0032313~regulation of Rab GTPase activity,GO:0032318~regulation of Ras GTPase activity,GO:0032483~regulation of Rab protein signal transduction,GO:0043087~regulation of GTPase activity,GO:0046578~regulation of Ras protein signal transduction,GO:0051056~regulation of small GTPase mediated signal transduction,GO:0051336~regulation of hydrolase activity,	GO:0005813~centrosome,GO:0005815~microtubule organizing center,GO:0005829~cytosol,GO:0005856~cytoskeleton,GO:0005875~microtubule associated complex,GO:0015630~microtubule cytoskeleton,GO:0043228~non-membrane-bounded organelle,GO:0043232~intracellular non-membrane-bounded organelle,GO:0044430~cytoskeletal part,	GO:0005083~small GTPase regulator activity,GO:0005096~GTPase activator activity,GO:0005097~Rab GTPase activator activity,GO:0005099~Ras GTPase activator activity,GO:0008047~enzyme activator activity,GO:0008092~cytoskeletal protein binding,GO:0015631~tubulin binding,GO:0030695~GTPase regulator activity,GO:0060589~nucleoside-triphosphatase regulator activity,	IPR000195:RabGAP/TBC,IPR006020:Phosphotyrosine interaction region,IPR011993:Pleckstrin homology-type,			PIRSF038444:Rab1-like GAP,	SM00164:TBC,SM00462:PTB,	alternative splicing,cell cycle,coiled coil,complete proteome,cytoplasm,cytoskeleton,GTPase activation,phosphoprotein,	chain:Rab GTPase-activating protein 1,domain:PID,domain:Rab-GAP TBC,modified residue,splice variant,
ENSG00000157869	RAB28, member RAS oncogene family	Homo sapiens				GO:0007242~intracellular signaling cascade,GO:0007264~small GTPase mediated signal transduction,	GO:0005886~plasma membrane,GO:0009898~internal side of plasma membrane,GO:0044459~plasma membrane part,	GO:0000166~nucleotide binding,GO:0003924~GTPase activity,GO:0005525~GTP binding,GO:0017076~purine nucleotide binding,GO:0019001~guanyl nucleotide binding,GO:0032553~ribonucleotide binding,GO:0032555~purine ribonucleotide binding,GO:0032561~guanyl ribonucleotide binding,	IPR001806:Ras GTPase,IPR005225:Small GTP-binding protein,IPR013753:Ras,					3d-structure,alternative splicing,cell membrane,complete proteome,GTP binding,gtp-binding,lipoprotein,membrane,nucleotide binding,nucleotide-binding,P-loop,prenylation,	chain:Ras-related protein Rab-28,helix,lipid moiety-binding region:S-farnesyl cysteine,nucleotide phosphate-binding region:GTP,sequence conflict,short sequence motif:Effector region,splice variant,strand,
ENSG00000167771	REST corepressor 2	Homo sapiens				GO:0006350~transcription,GO:0009890~negative regulation of biosynthetic process,GO:0010558~negative regulation of macromolecule biosynthetic process,GO:0010605~negative regulation of macromolecule metabolic process,GO:0010629~negative regulation of gene expression,GO:0016481~negative regulation of transcription,GO:0031327~negative regulation of cellular biosynthetic process,GO:0045449~regulation …	GO:0000785~chromatin,GO:0005654~nucleoplasm,GO:0005667~transcription factor complex,GO:0005694~chromosome,GO:0031974~membrane-enclosed lumen,GO:0031981~nuclear lumen,GO:0043228~non-membrane-bounded organelle,GO:0043232~intracellular non-membrane-bounded organelle,GO:0043233~organelle lumen,GO:0044427~chromosomal part,GO:0044451~nucleoplasm part,GO:0070013~intracellular organelle lumen,	GO:0003677~DNA binding,GO:0003700~transcription factor activity,GO:0003712~transcription cofactor activity,GO:0003714~transcription corepressor activity,GO:0008134~transcription factor binding,GO:0016564~transcription repressor activity,GO:0030528~transcription regulator activity,	IPR000949:ELM2,IPR001005:SANT, DNA-binding,IPR012287:Homeodomain-related,IPR014778:Myb, DNA-binding,IPR017884:SANT, eukarya,				SM00717:SANT,	coiled coil,complete proteome,nucleus,polymorphism,repeat,repressor,Transcription,transcription regulation,	chain:REST corepressor 2,compositionally biased region:Pro-rich,domain:ELM2,domain:SANT 1,domain:SANT 2,sequence conflict,sequence variant,
ENSG00000163785	RYK receptor-like tyrosine kinase	Homo sapiens				GO:0000902~cell morphogenesis,GO:0000904~cell morphogenesis involved in differentiation,GO:0001501~skeletal system development,GO:0006468~protein amino acid phosphorylation,GO:0006793~phosphorus metabolic process,GO:0006796~phosphate metabolic process,GO:0007166~cell surface receptor linked signal transduction,GO:0007409~axonogenesis,GO:0016055~Wnt receptor signaling pathway,GO:0016310~phosphoryl…	GO:0000267~cell fraction,GO:0005624~membrane fraction,GO:0005626~insoluble fraction,GO:0005886~plasma membrane,GO:0005887~integral to plasma membrane,GO:0016021~integral to membrane,GO:0031224~intrinsic to membrane,GO:0031226~intrinsic to plasma membrane,GO:0044459~plasma membrane part,	GO:0000166~nucleotide binding,GO:0001882~nucleoside binding,GO:0001883~purine nucleoside binding,GO:0004672~protein kinase activity,GO:0004713~protein tyrosine kinase activity,GO:0004714~transmembrane receptor protein tyrosine kinase activity,GO:0005524~ATP binding,GO:0017076~purine nucleotide binding,GO:0017147~Wnt-protein binding,GO:0030554~adenyl nucleotide binding,GO:0032553~ribonucleotide bi…	IPR000719:Protein kinase, core,IPR001245:Tyrosine protein kinase,IPR003306:WIF domain,IPR008266:Tyrosine protein kinase, active site,IPR017441:Protein kinase, ATP binding site,				SM00219:TyrKc,SM00469:WIF,	alternative splicing,ATP,atp-binding,complete proteome,glycoprotein,kinase,magnesium,membrane,nucleotide-binding,phosphoprotein,phosphotransferase,polymorphism,receptor,signal,transferase,transmembrane,tyrosine-protein kinase,tyrosine-specific protein kinase,	active site:Proton acceptor,binding site:ATP,chain:Tyrosine-protein kinase RYK,domain:Protein kinase,domain:WIF,glycosylation site:N-linked (GlcNAc...),modified residue,nucleotide phosphate-binding region:ATP,sequence conflict,sequence variant,signal peptide,splice variant,topological domain:Cytoplasmic,topological domain:Extracellular,transmembrane region,
ENSG00000140750	Rho GTPase activating protein 17	Homo sapiens					GO:0005886~plasma membrane,GO:0005911~cell-cell junction,GO:0005923~tight junction,GO:0016327~apicolateral plasma membrane,GO:0019898~extrinsic to membrane,GO:0030054~cell junction,GO:0043296~apical junction complex,GO:0044459~plasma membrane part,GO:0070160~occluding junction,	GO:0005096~GTPase activator activity,GO:0008047~enzyme activator activity,GO:0017124~SH3 domain binding,GO:0019904~protein domain specific binding,GO:0030695~GTPase regulator activity,GO:0060589~nucleoside-triphosphatase regulator activity,	IPR000198:RhoGAP,IPR004148:BAR,				SM00324:RhoGAP,SM00721:BAR,	acetylation,alternative splicing,cell junction,complete proteome,cytoplasm,GTPase activation,membrane,phosphoprotein,sh3-binding,Tight junction,	chain:Rho GTPase-activating protein 17,compositionally biased region:Pro-rich,domain:BAR,domain:Rho-GAP,modified residue,mutagenesis site,sequence conflict,short sequence motif:SH3-binding,splice variant,
ENSG00000140386	S-phase cyclin A-associated protein in the ER	Homo sapiens					GO:0005783~endoplasmic reticulum,	GO:0008270~zinc ion binding,GO:0043167~ion binding,GO:0043169~cation binding,GO:0046872~metal ion binding,GO:0046914~transition metal ion binding,	IPR007087:Zinc finger, C2H2-type,IPR015880:Zinc finger, C2H2-like,				SM00355:ZnF_C2H2,	alternative splicing,complete proteome,endoplasmic reticulum,metal-binding,nucleus,phosphoprotein,polymorphism,zinc,zinc-finger,	chain:S phase cyclin A-associated protein in the endoplasmic reticulum,compositionally biased region:Glu-rich,modified residue,mutagenesis site,sequence conflict,sequence variant,splice variant,zinc finger region:C2H2-type,
ENSG00000143499	SET and MYND domain containing 2	Homo sapiens						GO:0008270~zinc ion binding,GO:0043167~ion binding,GO:0043169~cation binding,GO:0046872~metal ion binding,GO:0046914~transition metal ion binding,	IPR001214:SET,IPR002893:Zinc finger, MYND-type,			PIRSF027061:protein methyltransferase, HSKM-B type,	SM00317:SET,	complete proteome,metal-binding,polymorphism,zinc,zinc-finger,	chain:SET and MYND domain-containing protein 2,domain:SET,sequence variant,zinc finger region:MYND-type,
ENSG00000163788	SNF related kinase	Homo sapiens				GO:0002520~immune system development,GO:0006468~protein amino acid phosphorylation,GO:0006793~phosphorus metabolic process,GO:0006796~phosphate metabolic process,GO:0016310~phosphorylation,GO:0030097~hemopoiesis,GO:0030099~myeloid cell differentiation,GO:0048534~hemopoietic or lymphoid organ development,		GO:0000166~nucleotide binding,GO:0000287~magnesium ion binding,GO:0001882~nucleoside binding,GO:0001883~purine nucleoside binding,GO:0004672~protein kinase activity,GO:0004674~protein serine/threonine kinase activity,GO:0005524~ATP binding,GO:0017076~purine nucleotide binding,GO:0030554~adenyl nucleotide binding,GO:0032553~ribonucleotide binding,GO:0032555~purine ribonucleotide binding,GO:0032559…	IPR000719:Protein kinase, core,IPR002290:Serine/threonine protein kinase,IPR008271:Serine/threonine protein kinase, active site,IPR015940:Ubiquitin-associated/translation elongation factor EF1B, N-terminal, eukaryote,IPR017441:Protein kinase, ATP binding site,IPR017442:Serine/threonine protein kinase-related,				SM00165:UBA,SM00220:S_TKc,	acetylation,alternative splicing,atp-binding,complete proteome,kinase,magnesium,metal-binding,nucleotide-binding,nucleus,phosphoprotein,polymorphism,serine/threonine-protein kinase,transferase,	active site:Proton acceptor,binding site:ATP,chain:SNF-related serine/threonine-protein kinase,domain:Protein kinase,domain:UBA,modified residue,mutagenesis site,nucleotide phosphate-binding region:ATP,sequence conflict,sequence variant,splice variant,
ENSG00000115107	STEAP family member 3	Homo sapiens				GO:0000041~transition metal ion transport,GO:0006811~ion transport,GO:0006812~cation transport,GO:0006826~iron ion transport,GO:0006915~apoptosis,GO:0007049~cell cycle,GO:0008219~cell death,GO:0012501~programmed cell death,GO:0015674~di-, tri-valent inorganic cation transport,GO:0016265~death,GO:0030001~metal ion transport,GO:0055114~oxidation reduction,	GO:0005768~endosome,GO:0005886~plasma membrane,GO:0016021~integral to membrane,GO:0031224~intrinsic to membrane,	GO:0000166~nucleotide binding,GO:0000293~ferric-chelate reductase activity,GO:0001882~nucleoside binding,GO:0001883~purine nucleoside binding,GO:0005506~iron ion binding,GO:0005507~copper ion binding,GO:0009055~electron carrier activity,GO:0016722~oxidoreductase activity, oxidizing metal ions,GO:0016723~oxidoreductase activity, oxidizing metal ions, NAD or NADP as acceptor,GO:0017076~purine nucle…	IPR004455:NADP oxidoreductase, coenzyme F420-dependent,IPR013130:Ferric reductase-like transmembrane component, N-terminal,IPR016040:NAD(P)-binding domain,	hsa04115:p53 signaling pathway,				3d-structure,alternative splicing,Apoptosis,cell cycle,complete proteome,copper,endosome,FAD,Flavoprotein,glycoprotein,ion transport,iron,iron transport,membrane,metal-binding,nad,oxidoreductase,phosphoprotein,polymorphism,transmembrane,transport,	chain:Metalloreductase STEAP3,domain:Ferric oxidoreductase,glycosylation site:N-linked (GlcNAc...),helix,metal ion-binding site:Iron (heme axial ligand),modified residue,sequence conflict,sequence variant,splice variant,strand,topological domain:Cytoplasmic,topological domain:Vesicular,transmembrane region,
ENSG00000172845	Sp3 transcription factor	Homo sapiens		h_calcineurinPathway:Effects of calcineurin in Keratinocyte Differentiation,h_tercPathway:Overview of telomerase RNA component gene hTerc Transcriptional Regulation,h_tertpathway:Overview of telomerase protein component gene hTert Transcriptional Regulation ,		GO:0001501~skeletal system development,GO:0001503~ossification,GO:0001654~eye development,GO:0001701~in utero embryonic development,GO:0001775~cell activation,GO:0001779~natural killer cell differentiation,GO:0001824~blastocyst development,GO:0001825~blastocyst formation,GO:0001829~trophectodermal cell differentiation,GO:0001889~liver development,GO:0001890~placenta development,GO:0001892~embryon…		GO:0003677~DNA binding,GO:0003682~chromatin binding,GO:0003690~double-stranded DNA binding,GO:0008270~zinc ion binding,GO:0016563~transcription activator activity,GO:0016564~transcription repressor activity,GO:0030528~transcription regulator activity,GO:0043167~ion binding,GO:0043169~cation binding,GO:0043566~structure-specific DNA binding,GO:0046872~metal ion binding,GO:0046914~transition metal …	IPR007087:Zinc finger, C2H2-type,IPR013087:Zinc finger, C2H2-type/integrase, DNA-binding,IPR015880:Zinc finger, C2H2-like,			PIRSF037570:transcription factor, Sp1/Sp2/Sp3/Sp4 types,PIRSF500822:transcription factor Sp3,	SM00355:ZnF_C2H2,	acetylation,activator,alternative initiation,alternative splicing,complete proteome,dna-binding,isopeptide bond,metal-binding,nucleus,phosphoprotein,polymorphism,repeat,repressor,Transcription,transcription regulation,ubl conjugation,zinc,zinc-finger,	chain:Transcription factor Sp3,compositionally biased region:Ala-rich,compositionally biased region:Poly-Gln,compositionally biased region:Poly-Gly,cross-link:Glycyl lysine isopeptide (Lys-Gly) (interchain with G-Cter in SUMO),cross-link:Glycyl lysine isopeptide (Lys-Gly) (interchain with G-Cter in SUMO); alternate,modified residue,mutagenesis site,region of interest:Repressor domain,region of in…
ENSG00000132405	TBC1 domain family, member 14	Homo sapiens			General function prediction only,	GO:0032313~regulation of Rab GTPase activity,GO:0032318~regulation of Ras GTPase activity,GO:0032483~regulation of Rab protein signal transduction,GO:0043087~regulation of GTPase activity,GO:0046578~regulation of Ras protein signal transduction,GO:0051056~regulation of small GTPase mediated signal transduction,GO:0051336~regulation of hydrolase activity,		GO:0005083~small GTPase regulator activity,GO:0005096~GTPase activator activity,GO:0005097~Rab GTPase activator activity,GO:0005099~Ras GTPase activator activity,GO:0008047~enzyme activator activity,GO:0030695~GTPase regulator activity,GO:0060589~nucleoside-triphosphatase regulator activity,	IPR000195:RabGAP/TBC,				SM00164:TBC,	3d-structure,complete proteome,GTPase activation,polymorphism,	chain:TBC1 domain family member 14,domain:Rab-GAP TBC,helix,sequence conflict,sequence variant,strand,turn,
ENSG00000160606	TLC domain containing 1	Homo sapiens					GO:0016021~integral to membrane,GO:0031224~intrinsic to membrane,		IPR006634:TRAM, LAG1 and CLN8 homology,				SM00724:TLC,	complete proteome,membrane,signal,transmembrane,	chain:TLC domain-containing protein 1,domain:TLC,signal peptide,transmembrane region,
ENSG00000162604	TM2 domain containing 1	Homo sapiens				GO:0006915~apoptosis,GO:0006917~induction of apoptosis,GO:0008219~cell death,GO:0008624~induction of apoptosis by extracellular signals,GO:0010941~regulation of cell death,GO:0010942~positive regulation of cell death,GO:0012501~programmed cell death,GO:0012502~induction of programmed cell death,GO:0016265~death,GO:0042981~regulation of apoptosis,GO:0043065~positive regulation of apoptosis,GO:0043…	GO:0005886~plasma membrane,GO:0005887~integral to plasma membrane,GO:0016021~integral to membrane,GO:0031224~intrinsic to membrane,GO:0031226~intrinsic to plasma membrane,GO:0044459~plasma membrane part,	GO:0001540~beta-amyloid binding,	IPR007829:TM2,					Apoptosis,complete proteome,direct protein sequencing,glycoprotein,membrane,signal,transmembrane,	chain:TM2 domain-containing protein 1,glycosylation site:N-linked (GlcNAc...),signal peptide,transmembrane region,
ENSG00000128564	VGF nerve growth factor inducible	Homo sapiens				GO:0001541~ovarian follicle development,GO:0002021~response to dietary excess,GO:0002790~peptide secretion,GO:0003001~generation of a signal involved in cell-cell signaling,GO:0003006~reproductive developmental process,GO:0006091~generation of precursor metabolites and energy,GO:0007267~cell-cell signaling,GO:0007548~sex differentiation,GO:0007618~mating,GO:0007620~copulation,GO:0008406~gonad dev…	GO:0005576~extracellular region,GO:0005615~extracellular space,GO:0012505~endomembrane system,GO:0012506~vesicle membrane,GO:0016023~cytoplasmic membrane-bounded vesicle,GO:0030141~secretory granule,GO:0030659~cytoplasmic vesicle membrane,GO:0030667~secretory granule membrane,GO:0031090~organelle membrane,GO:0031410~cytoplasmic vesicle,GO:0031982~vesicle,GO:0031988~membrane-bounded vesicle,GO:004…	GO:0005179~hormone activity,GO:0005184~neuropeptide hormone activity,GO:0008083~growth factor activity,						complete proteome,cytoplasmic vesicle,growth factor,Secreted,signal,	chain:Neurosecretory protein VGF,compositionally biased region:Asp/Glu-rich (acidic),sequence conflict,signal peptide,
ENSG00000164087	WD repeat domain 51A	Homo sapiens							IPR001680:WD40 repeat,IPR015943:WD40/YVTN repeat-like,IPR017986:WD40 repeat, region,IPR019775:WD40 repeat, conserved site,IPR019781:WD40 repeat, subgroup,IPR019782:WD40 repeat 2,				SM00320:WD40,	alternative splicing,coiled coil,complete proteome,polymorphism,repeat,wd repeat,	chain:WD repeat-containing protein 51A,repeat:WD 1,repeat:WD 2,repeat:WD 3,repeat:WD 4,repeat:WD 5,repeat:WD 6,repeat:WD 7,sequence conflict,sequence variant,splice variant,
ENSG00000175877	Williams-Beuren syndrome chromosome region 28	Homo sapiens					GO:0016021~integral to membrane,GO:0031224~intrinsic to membrane,							alternative splicing,complete proteome,membrane,polymorphism,transmembrane,	chain:Williams-Beuren syndrome chromosomal region 28 protein,sequence variant,splice variant,transmembrane region,
ENSG00000166896	XRCC6 binding protein 1	Homo sapiens				GO:0000726~non-recombinational repair,GO:0006259~DNA metabolic process,GO:0006281~DNA repair,GO:0006302~double-strand break repair,GO:0006303~double-strand break repair via nonhomologous end joining,GO:0006508~proteolysis,GO:0006974~response to DNA damage stimulus,GO:0033554~cellular response to stress,	GO:0005958~DNA-dependent protein kinase-DNA ligase 4 complex,GO:0070419~nonhomologous end joining complex,	GO:0004672~protein kinase activity,GO:0004674~protein serine/threonine kinase activity,GO:0004677~DNA-dependent protein kinase activity,GO:0008233~peptidase activity,GO:0008237~metallopeptidase activity,GO:0008270~zinc ion binding,GO:0043167~ion binding,GO:0043169~cation binding,GO:0046872~metal ion binding,GO:0046914~transition metal ion binding,GO:0070011~peptidase activity, acting on L-amino a…	IPR006025:Peptidase M, neutral zinc metallopeptidases, zinc-binding site,IPR019165:Peptidase M76, ATP23,					complete proteome,hydrolase,metal-binding,metalloprotease,polymorphism,Protease,	chain:Mitochondrial inner membrane protease ATP23 homolog,metal ion-binding site:Divalent metal cation; catalytic,sequence variant,
ENSG00000100997	abhydrolase domain containing 12	Homo sapiens					GO:0016021~integral to membrane,GO:0031224~intrinsic to membrane,	GO:0004091~carboxylesterase activity,GO:0016298~lipase activity,GO:0047372~acylglycerol lipase activity,	IPR000073:Alpha/beta hydrolase fold-1,					alternative splicing,complete proteome,glycoprotein,hydrolase,membrane,polymorphism,transmembrane,	active site:Charge relay system,chain:Monoacylglycerol lipase ABHD12,compositionally biased region:Poly-Ala,compositionally biased region:Poly-Ser,sequence conflict,sequence variant,splice variant,topological domain:Cytoplasmic,topological domain:Extracellular,transmembrane region,
ENSG00000075624	actin, beta	Homo sapiens		h_hSWI-SNFpathway:Chromatin Remodeling by hSWI/SNF ATP-dependent Complexes,		GO:0000902~cell morphogenesis,GO:0000904~cell morphogenesis involved in differentiation,GO:0006928~cell motion,GO:0007409~axonogenesis,GO:0010035~response to inorganic substance,GO:0010038~response to metal ion,GO:0030030~cell projection organization,GO:0030182~neuron differentiation,GO:0031175~neuron projection development,GO:0032989~cellular component morphogenesis,GO:0032990~cell part morphoge…	GO:0000123~histone acetyltransferase complex,GO:0000267~cell fraction,GO:0005625~soluble fraction,GO:0005654~nucleoplasm,GO:0005829~cytosol,GO:0005856~cytoskeleton,GO:0005938~cell cortex,GO:0030424~axon,GO:0030529~ribonucleoprotein complex,GO:0030863~cortical cytoskeleton,GO:0031974~membrane-enclosed lumen,GO:0031981~nuclear lumen,GO:0034708~methyltransferase complex,GO:0035097~histone methyltran…	GO:0000166~nucleotide binding,GO:0001882~nucleoside binding,GO:0001883~purine nucleoside binding,GO:0005198~structural molecule activity,GO:0005200~structural constituent of cytoskeleton,GO:0005524~ATP binding,GO:0017076~purine nucleotide binding,GO:0019899~enzyme binding,GO:0019900~kinase binding,GO:0019901~protein kinase binding,GO:0030554~adenyl nucleotide binding,GO:0032553~ribonucleotide bin…	IPR004000:Actin/actin-like,IPR004001:Actin, conserved site,	hsa04510:Focal adhesion,hsa04520:Adherens junction,hsa04530:Tight junction,hsa04670:Leukocyte transendothelial migration,hsa04810:Regulation of actin cytoskeleton,hsa05110:Vibrio cholerae infection,hsa05130:Pathogenic Escherichia coli infection,hsa05410:Hypertrophic cardiomyopathy (HCM),hsa05412:Arrhythmogenic right ventricular cardiomyopathy (ARVC),hsa05414:Dilated cardiomyopathy,hsa05416:Viral …	Dystonia, juvenile-onset,	PIRSF002337:Actin,	SM00268:ACTIN,	3d-structure,acetylation,atp-binding,cell motility,complete proteome,cytoplasm,cytoskeleton,deafness,direct protein sequencing,disease mutation,dystonia,methylated amino acid,methylation,microfilament,mitosis,nucleotide-binding,phosphoprotein,polymorphism,structural protein,	chain:Actin, cytoplasmic 1,chain:Actin, cytoplasmic 1, N-terminally processed,modified residue,sequence conflict,sequence variant,
ENSG00000077522	actinin, alpha 2	Homo sapiens		h_cell2cellPathway:Cell to Cell Adhesion Signaling,h_integrinPathway:Integrin Signaling Pathway,h_ucalpainPathway:uCalpain and friends in Cell spread,		GO:0003012~muscle system process,GO:0006461~protein complex assembly,GO:0006936~muscle contraction,GO:0007044~cell-substrate junction assembly,GO:0007155~cell adhesion,GO:0007160~cell-matrix adhesion,GO:0010941~regulation of cell death,GO:0022610~biological adhesion,GO:0030030~cell projection organization,GO:0030031~cell projection assembly,GO:0030035~microspike assembly,GO:0031589~cell-substrate…	GO:0005576~extracellular region,GO:0005730~nucleolus,GO:0005856~cytoskeleton,GO:0005884~actin filament,GO:0005886~plasma membrane,GO:0005912~adherens junction,GO:0005924~cell-substrate adherens junction,GO:0005925~focal adhesion,GO:0015629~actin cytoskeleton,GO:0016023~cytoplasmic membrane-bounded vesicle,GO:0016323~basolateral plasma membrane,GO:0030016~myofibril,GO:0030017~sarcomere,GO:0030018~…	GO:0003712~transcription cofactor activity,GO:0003713~transcription coactivator activity,GO:0003779~actin binding,GO:0005178~integrin binding,GO:0005198~structural molecule activity,GO:0005509~calcium ion binding,GO:0008092~cytoskeletal protein binding,GO:0008134~transcription factor binding,GO:0008307~structural constituent of muscle,GO:0010861~thyroid hormone receptor activator activity,GO:0016…	IPR001589:Actinin-type, actin-binding, conserved site,IPR001715:Calponin-like actin-binding,IPR002017:Spectrin repeat,IPR002048:Calcium-binding EF-hand,IPR011992:EF-Hand type,IPR014837:EF-hand, Ca insensitive,IPR018159:Spectrin/alpha-actinin,IPR018248:EF hand,IPR018249:EF-HAND 2,	hsa04510:Focal adhesion,hsa04520:Adherens junction,hsa04530:Tight junction,hsa04670:Leukocyte transendothelial migration,hsa04810:Regulation of actin cytoskeleton,hsa05322:Systemic lupus erythematosus,hsa05412:Arrhythmogenic right ventricular cardiomyopathy (ARVC),	Cardiomyopathy, dilated, 1AA,	PIRSF002301:alpha-actinin,	SM00033:CH,SM00054:EFh,SM00150:SPEC,	3d-structure,actin binding,actin-binding,calcium,cardiac muscle,Cardiomyopathy,complete proteome,cytoplasm,disease mutation,duplication,EF hand,heart,homodimer,phosphoprotein,polymorphism,repeat,skeletal muscle,	calcium-binding region:1; possibly ancestral,calcium-binding region:2; possibly ancestral,chain:Alpha-actinin-2,domain:Actin-binding,domain:CH 1,domain:CH 2,domain:EF-hand 1,domain:EF-hand 2,helix,modified residue,repeat:Spectrin 1,repeat:Spectrin 2,repeat:Spectrin 3,repeat:Spectrin 4,sequence variant,strand,turn,
ENSG00000065000	adaptor-related protein complex 3, delta 1 subunit	Homo sapiens			Intracellular trafficking and secretion,	GO:0002475~antigen processing and presentation via MHC class Ib,GO:0002684~positive regulation of immune system process,GO:0002694~regulation of leukocyte activation,GO:0002696~positive regulation of leukocyte activation,GO:0006726~eye pigment biosynthetic process,GO:0006886~intracellular protein transport,GO:0008104~protein localization,GO:0015031~protein transport,GO:0016192~vesicle-mediated tr…	GO:0005794~Golgi apparatus,GO:0005886~plasma membrane,GO:0009898~internal side of plasma membrane,GO:0030117~membrane coat,GO:0044459~plasma membrane part,GO:0048475~coated membrane,	GO:0008565~protein transporter activity,	IPR002553:Clathrin/coatomer adaptor, adaptin-like, N-terminal,IPR010474:Bovine leukaemia virus receptor,IPR011989:Armadillo-like helical,IPR017105:Adaptor protein complex AP-3, delta subunit,	hsa04142:Lysosome,		PIRSF037092:adaptor protein complex AP-3, delta subunit,PIRSF037092:AP3_complex_delta,		alternative splicing,complete proteome,cytoplasm,golgi apparatus,membrane,phosphoprotein,polymorphism,protein transport,transport,	chain:AP-3 complex subunit delta-1,modified residue,sequence conflict,sequence variant,splice variant,
ENSG00000122359	annexin A11	Homo sapiens				GO:0000910~cytokinesis,GO:0000920~cell separation during cytokinesis,GO:0006955~immune response,GO:0007109~cytokinesis, completion of separation,GO:0010035~response to inorganic substance,GO:0010038~response to metal ion,GO:0032506~cytokinetic process,GO:0051301~cell division,GO:0051592~response to calcium ion,	GO:0005635~nuclear envelope,GO:0005654~nucleoplasm,GO:0005819~spindle,GO:0005856~cytoskeleton,GO:0012505~endomembrane system,GO:0015630~microtubule cytoskeleton,GO:0016023~cytoplasmic membrane-bounded vesicle,GO:0030496~midbody,GO:0031410~cytoplasmic vesicle,GO:0031967~organelle envelope,GO:0031974~membrane-enclosed lumen,GO:0031975~envelope,GO:0031981~nuclear lumen,GO:0031982~vesicle,GO:0031988~…	GO:0005509~calcium ion binding,GO:0005543~phospholipid binding,GO:0005544~calcium-dependent phospholipid binding,GO:0008289~lipid binding,GO:0043167~ion binding,GO:0043169~cation binding,GO:0046872~metal ion binding,GO:0048306~calcium-dependent protein binding,	IPR001464:Annexin,IPR008157:Annexin, type XI, N-terminal,IPR015475:Annexin XI,IPR018252:Annexin repeat, conserved site,IPR018502:Annexin repeat,			PIRSF002360:annexin VII,	SM00335:ANX,	acetylation,annexin,calcium,calcium binding,calcium/phospholipid-binding,cell cycle,cell division,complete proteome,cytoplasm,cytoskeleton,duplication,endonexin fold,glycoprotein,nucleus,phospholipid binding,phosphoprotein,polymorphism,repeat,	chain:Annexin A11,modified residue,repeat:Annexin 1,repeat:Annexin 2,repeat:Annexin 3,repeat:Annexin 4,sequence variant,
ENSG00000198250	anthrax toxin receptor-like	Homo sapiens					GO:0016021~integral to membrane,GO:0031224~intrinsic to membrane,	GO:0043167~ion binding,GO:0043169~cation binding,GO:0046872~metal ion binding,
ENSG00000101200	arginine vasopressin	Homo sapiens		h_hdacPathway:Control of skeletal myogenesis by HDAC & calcium/calmodulin-dependent kinase (CaMK),		GO:0001558~regulation of cell growth,GO:0002118~aggressive behavior,GO:0002125~maternal aggressive behavior,GO:0003013~circulatory system process,GO:0003014~renal system process,GO:0003018~vascular process in circulatory system,GO:0003073~regulation of systemic arterial blood pressure,GO:0003078~regulation of natriuresis,GO:0003084~positive regulation of systemic arterial blood pressure,GO:000309…	GO:0000267~cell fraction,GO:0005576~extracellular region,GO:0005615~extracellular space,GO:0005625~soluble fraction,GO:0016023~cytoplasmic membrane-bounded vesicle,GO:0030141~secretory granule,GO:0030425~dendrite,GO:0031410~cytoplasmic vesicle,GO:0031982~vesicle,GO:0031988~membrane-bounded vesicle,GO:0042995~cell projection,GO:0043005~neuron projection,GO:0044421~extracellular region part,	GO:0005179~hormone activity,GO:0005184~neuropeptide hormone activity,GO:0031855~oxytocin receptor binding,GO:0031893~vasopressin receptor binding,GO:0031894~V1A vasopressin receptor binding,GO:0031895~V1B vasopressin receptor binding,	IPR000981:Neurohypophysial hormone,IPR016321:Nonapeptide hormone precursor,		Diabetes insipidus, neurohypophyseal,	PIRSF001815:nonapeptide hormone precursor,PIRSF001815:Nonapeptide_hormone_precursor,	SM00003:NH,	amidated carboxyl end,amidation,cleavage on pair of basic residues,complete proteome,diabetes insipidus,direct protein sequencing,disease mutation,disulfide bond,glycoprotein,hormone,hypothalamus,polymorphism,Secreted,signal,vasoactive,vasoconstrictor,	chain:Neurophysin 2,disulfide bond,glycosylation site:N-linked (GlcNAc...),modified residue,peptide:Arg-vasopressin,peptide:Copeptin,sequence conflict,sequence variant,signal peptide,
ENSG00000118690	armadillo repeat containing 2	Homo sapiens							IPR011989:Armadillo-like helical,					complete proteome,phosphoprotein,polymorphism,repeat,	chain:Armadillo repeat-containing protein 2,modified residue,repeat:ARM 1,repeat:ARM 10,repeat:ARM 11,repeat:ARM 12,repeat:ARM 2,repeat:ARM 3,repeat:ARM 4,repeat:ARM 5,repeat:ARM 6,repeat:ARM 7,repeat:ARM 8,repeat:ARM 9,sequence variant,
ENSG00000174808	betacellulin	Homo sapiens				GO:0003074~regulation of diuresis,GO:0003103~positive regulation of diuresis,GO:0007088~regulation of mitosis,GO:0007346~regulation of mitotic cell cycle,GO:0008284~positive regulation of cell proliferation,GO:0010564~regulation of cell cycle process,GO:0010638~positive regulation of organelle organization,GO:0010941~regulation of cell death,GO:0032844~regulation of homeostatic process,GO:0033043…	GO:0000267~cell fraction,GO:0005576~extracellular region,GO:0005615~extracellular space,GO:0005625~soluble fraction,GO:0005886~plasma membrane,GO:0016021~integral to membrane,GO:0031224~intrinsic to membrane,GO:0044421~extracellular region part,	GO:0005154~epidermal growth factor receptor binding,GO:0008083~growth factor activity,	IPR000742:EGF-like, type 3,IPR001336:EGF, type 1,IPR006209:EGF,IPR006210:EGF-like,IPR013032:EGF-like region, conserved site,IPR015497:Epidermal growth factor receptor ligand,	hsa04012:ErbB signaling pathway,			SM00181:EGF,	3d-structure,cell membrane,complete proteome,disulfide bond,egf-like domain,glycoprotein,growth factor,membrane,mitogen,polymorphism,Secreted,signal,transmembrane,	chain:Betacellulin,chain:Probetacellulin,compositionally biased region:Arg/Lys-rich (basic),disulfide bond,domain:EGF-like,glycosylation site:N-linked (GlcNAc...),helix,propeptide:Removed in mature form,sequence variant,signal peptide,strand,topological domain:Cytoplasmic,topological domain:Extracellular,transmembrane region,turn,
ENSG00000185963	bicaudal D homolog 2 (Drosophila)	Homo sapiens				GO:0007017~microtubule-based process,GO:0007018~microtubule-based movement,	GO:0005794~Golgi apparatus,GO:0005856~cytoskeleton,GO:0043228~non-membrane-bounded organelle,GO:0043232~intracellular non-membrane-bounded organelle,		IPR018477:Bicaudal-D protein, microtubule-associated,					alternative splicing,coiled coil,complete proteome,cytoplasm,cytoskeleton,golgi apparatus,phosphoprotein,	chain:Protein bicaudal D homolog 2,modified residue,region of interest:Interacts with RAB6A,splice variant,
ENSG00000105552	branched chain aminotransferase 2, mitochondrial	Homo sapiens				GO:0006549~isoleucine metabolic process,GO:0006550~isoleucine catabolic process,GO:0006551~leucine metabolic process,GO:0007595~lactation,GO:0008652~cellular amino acid biosynthetic process,GO:0009063~cellular amino acid catabolic process,GO:0009081~branched chain family amino acid metabolic process,GO:0009082~branched chain family amino acid biosynthetic process,GO:0009083~branched chain family …	GO:0005739~mitochondrion,	GO:0004084~branched-chain-amino-acid transaminase activity,GO:0008483~transaminase activity,GO:0016769~transferase activity, transferring nitrogenous groups,	IPR001544:Aminotransferase, class IV,IPR005786:Branched-chain amino acid aminotransferase II,IPR018300:Aminotransferase, class IV, conserved site,	hsa00280:Valine, leucine and isoleucine degradation,hsa00290:Valine, leucine and isoleucine biosynthesis,hsa00770:Pantothenate and CoA biosynthesis,		PIRSF006468:BCAT1,		3d-structure,acetylation,alternative splicing,amino-acid biosynthesis,Aminotransferase,branched-chain amino acid biosynthesis,complete proteome,cytoplasm,mitochondrion,polymorphism,pyridoxal phosphate,transferase,transit peptide,	binding site:Substrate,chain:Branched-chain-amino-acid aminotransferase, mitochondrial,helix,modified residue,mutagenesis site,sequence conflict,sequence variant,splice variant,strand,transit peptide:Mitochondrion,turn,
ENSG00000132692	brevican	Homo sapiens				GO:0007155~cell adhesion,GO:0021537~telencephalon development,GO:0021543~pallium development,GO:0021761~limbic system development,GO:0021766~hippocampus development,GO:0022610~biological adhesion,GO:0030900~forebrain development,GO:0031644~regulation of neurological system process,GO:0044057~regulation of system process,GO:0048167~regulation of synaptic plasticity,GO:0048168~regulation of neurona…	GO:0005576~extracellular region,GO:0005578~proteinaceous extracellular matrix,GO:0008021~synaptic vesicle,GO:0012505~endomembrane system,GO:0012506~vesicle membrane,GO:0016021~integral to membrane,GO:0016023~cytoplasmic membrane-bounded vesicle,GO:0030135~coated vesicle,GO:0030136~clathrin-coated vesicle,GO:0030659~cytoplasmic vesicle membrane,GO:0030662~coated vesicle membrane,GO:0030665~clathri…	GO:0001871~pattern binding,GO:0005529~sugar binding,GO:0005539~glycosaminoglycan binding,GO:0005540~hyaluronic acid binding,GO:0030246~carbohydrate binding,GO:0030247~polysaccharide binding,	IPR000436:Sushi/SCR/CCP,IPR000538:Link,IPR000742:EGF-like, type 3,IPR001304:C-type lectin,IPR002353:Type II antifreeze protein,IPR003006:Immunoglobulin/major histocompatibility complex, conserved site,IPR003596:Immunoglobulin V-set, subgroup,IPR003599:Immunoglobulin subtype,IPR006209:EGF,IPR006210:EGF-like,IPR007110:Immunoglobulin-like,IPR013032:EGF-like region, conserved site,IPR013106:Immunoglo…			PIRSF002270:aggrecan,	SM00032:CCP,SM00034:CLECT,SM00181:EGF,SM00406:IGv,SM00409:IG,SM00445:LINK,	alternative splicing,complete proteome,disulfide bond,egf-like domain,extracellular matrix,glycoprotein,gpi-anchor,hyaluronic acid,Immunoglobulin domain,Lectin,lipoprotein,membrane,polymorphism,proteoglycan,repeat,Secreted,signal,sushi,transmembrane,	chain:Brevican core protein,compositionally biased region:Glu-rich,disulfide bond,domain:C-type lectin,domain:EGF-like,domain:Ig-like V-type,domain:Link 1,domain:Link 2,domain:Sushi,glycosylation site:N-linked (GlcNAc...),sequence conflict,sequence variant,signal peptide,splice variant,
ENSG00000149654	cadherin-like 22	Homo sapiens				GO:0007155~cell adhesion,GO:0007156~homophilic cell adhesion,GO:0016337~cell-cell adhesion,GO:0022610~biological adhesion,	GO:0005886~plasma membrane,GO:0016021~integral to membrane,GO:0031224~intrinsic to membrane,	GO:0005509~calcium ion binding,GO:0043167~ion binding,GO:0043169~cation binding,GO:0046872~metal ion binding,	IPR000233:Cadherin cytoplasmic region,IPR002126:Cadherin,			PIRSF002504:cadherin,	SM00112:CA,	calcium,cell adhesion,cell membrane,complete proteome,glycoprotein,membrane,repeat,signal,transmembrane,	chain:Cadherin-22,domain:Cadherin 1,domain:Cadherin 2,domain:Cadherin 3,domain:Cadherin 4,domain:Cadherin 5,glycosylation site:N-linked (GlcNAc...),signal peptide,topological domain:Cytoplasmic,topological domain:Extracellular,transmembrane region,
ENSG00000157445	calcium channel, voltage-dependent, alpha 2/delta subunit 3	Homo sapiens				GO:0006811~ion transport,GO:0006812~cation transport,GO:0006816~calcium ion transport,GO:0015674~di-, tri-valent inorganic cation transport,GO:0030001~metal ion transport,	GO:0016021~integral to membrane,GO:0031224~intrinsic to membrane,	GO:0005216~ion channel activity,GO:0005244~voltage-gated ion channel activity,GO:0005245~voltage-gated calcium channel activity,GO:0005261~cation channel activity,GO:0005262~calcium channel activity,GO:0005509~calcium ion binding,GO:0015267~channel activity,GO:0022803~passive transmembrane transporter activity,GO:0022832~voltage-gated channel activity,GO:0022836~gated channel activity,GO:0022838~…	IPR002035:von Willebrand factor, type A,IPR004010:Cache,IPR013608:VWA N-terminal,	hsa04010:MAPK signaling pathway,hsa04260:Cardiac muscle contraction,hsa05410:Hypertrophic cardiomyopathy (HCM),hsa05412:Arrhythmogenic right ventricular cardiomyopathy (ARVC),hsa05414:Dilated cardiomyopathy,		PIRSF002446:voltage-dependent calcium channel, fused alpha-2/delta subunits,	SM00327:VWA,	alternative splicing,calcium,calcium channel,calcium transport,complete proteome,disulfide bond,glycoprotein,ion transport,ionic channel,membrane,metal-binding,signal,transmembrane,transport,voltage-gated channel,	chain:Voltage-dependent calcium channel subunit alpha-2-3,chain:Voltage-dependent calcium channel subunit alpha-2/delta-3,chain:Voltage-dependent calcium channel subunit delta-3,domain:Cache,domain:VWFA,glycosylation site:N-linked (GlcNAc...),metal ion-binding site:Divalent metal cation,short sequence motif:MIDAS-like motif,signal peptide,splice variant,topological domain:Cytoplasmic,topological …
ENSG00000185972	calicin	Homo sapiens				GO:0007276~gamete generation,GO:0007283~spermatogenesis,GO:0019953~sexual reproduction,GO:0032504~multicellular organism reproduction,GO:0048232~male gamete generation,GO:0048609~reproductive process in a multicellular organism,	GO:0005856~cytoskeleton,GO:0033011~perinuclear theca,GO:0033150~cytoskeletal calyx,GO:0043228~non-membrane-bounded organelle,GO:0043232~intracellular non-membrane-bounded organelle,GO:0044430~cytoskeletal part,GO:0048471~perinuclear region of cytoplasm,	GO:0005198~structural molecule activity,GO:0005200~structural constituent of cytoskeleton,	IPR000210:BTB/POZ-like,IPR002355:Multicopper oxidase, copper-binding site,IPR006652:Kelch repeat type 1,IPR011333:BTB/POZ fold,IPR011705:BTB/Kelch-associated,IPR013069:BTB/POZ,IPR013089:Kelch related,IPR015915:Kelch-type beta propeller,				SM00225:BTB,SM00612:Kelch,	complete proteome,cytoplasm,cytoskeleton,developmental protein,differentiation,kelch repeat,polymorphism,repeat,spermatogenesis,	chain:Calicin,domain:BACK,domain:BTB,repeat:Kelch 1,repeat:Kelch 2,repeat:Kelch 3,repeat:Kelch 4,repeat:Kelch 5,repeat:Kelch 6,sequence conflict,sequence variant,
ENSG00000121898	carboxypeptidase X (M14 family), member 2	Homo sapiens				GO:0006508~proteolysis,GO:0007155~cell adhesion,GO:0022610~biological adhesion,	GO:0005576~extracellular region,	GO:0004180~carboxypeptidase activity,GO:0004181~metallocarboxypeptidase activity,GO:0008233~peptidase activity,GO:0008235~metalloexopeptidase activity,GO:0008237~metallopeptidase activity,GO:0008238~exopeptidase activity,GO:0008270~zinc ion binding,GO:0043167~ion binding,GO:0043169~cation binding,GO:0046872~metal ion binding,GO:0046914~transition metal ion binding,GO:0070011~peptidase activity, a…	IPR000421:Coagulation factor 5/8 type, C-terminal,IPR000834:Peptidase M14, carboxypeptidase A,IPR014766:Carboxypeptidase, regulatory region,				SM00231:FA58C,SM00631:Zn_pept,	complete proteome,disulfide bond,glycoprotein,polymorphism,Secreted,signal,	chain:Inactive carboxypeptidase-like protein X2,compositionally biased region:Poly-Leu,compositionally biased region:Pro-rich,disulfide bond,domain:F5/8 type C,glycosylation site:N-linked (GlcNAc...),sequence variant,signal peptide,
ENSG00000141527	caspase recruitment domain family, member 14	Homo sapiens				GO:0001932~regulation of protein amino acid phosphorylation,GO:0001934~positive regulation of protein amino acid phosphorylation,GO:0007242~intracellular signaling cascade,GO:0007243~protein kinase cascade,GO:0007249~I-kappaB kinase/NF-kappaB cascade,GO:0007250~activation of NF-kappaB-inducing kinase activity,GO:0010562~positive regulation of phosphorus metabolic process,GO:0010604~positive regul…	GO:0005886~plasma membrane,	GO:0019904~protein domain specific binding,GO:0050700~CARD domain binding,	IPR001315:Caspase Recruitment,IPR001478:PDZ/DHR/GLGF,IPR008144:Guanylate kinase,IPR008145:Guanylate kinase/L-type calcium channel region,			PIRSF037539:PIRSF037539,	SM00072:GuKc,SM00114:CARD,SM00228:PDZ,	coiled coil,complete proteome,cytoplasm,phosphoprotein,polymorphism,	chain:Caspase recruitment domain-containing protein 14,domain:CARD,domain:Guanylate kinase-like,domain:PDZ,modified residue,sequence conflict,sequence variant,
ENSG00000164287	cell division cycle 20 homolog B (S. cerevisiae)	Homo sapiens							IPR001680:WD40 repeat,IPR015943:WD40/YVTN repeat-like,IPR017986:WD40 repeat, region,IPR019775:WD40 repeat, conserved site,IPR019781:WD40 repeat, subgroup,IPR019782:WD40 repeat 2,				SM00320:WD40,	alternative splicing,complete proteome,polymorphism,repeat,wd repeat,	chain:Cell division cycle protein 20 homolog B,repeat:WD 1,repeat:WD 2,repeat:WD 3,repeat:WD 4,repeat:WD 5,repeat:WD 6,repeat:WD 7,sequence variant,splice variant,
ENSG00000140743	cerebellar degeneration-related protein 2, 62kDa	Homo sapiens										PIRSF036837:PIRSF036837,		coiled coil,complete proteome,DNA binding,leucine zipper,zinc finger,	chain:Cerebellar degeneration-related protein 2,sequence conflict,
ENSG00000102805	ceroid-lipofuscinosis, neuronal 5	Homo sapiens				GO:0006873~cellular ion homeostasis,GO:0006885~regulation of pH,GO:0007033~vacuole organization,GO:0007040~lysosome organization,GO:0007042~lysosomal lumen acidification,GO:0007600~sensory perception,GO:0007601~visual perception,GO:0008219~cell death,GO:0009057~macromolecule catabolic process,GO:0016265~death,GO:0019725~cellular homeostasis,GO:0021700~developmental maturation,GO:0030003~cellular …	GO:0000323~lytic vacuole,GO:0005764~lysosome,GO:0005765~lysosomal membrane,GO:0005773~vacuole,GO:0005774~vacuolar membrane,GO:0005775~vacuolar lumen,GO:0005783~endoplasmic reticulum,GO:0005794~Golgi apparatus,GO:0016021~integral to membrane,GO:0031090~organelle membrane,GO:0031224~intrinsic to membrane,GO:0031974~membrane-enclosed lumen,GO:0043233~organelle lumen,GO:0044437~vacuolar part,GO:00484…			hsa04142:Lysosome,	Ceroid-lipofuscinosis, neuronal-5, variant late infantile,			complete proteome,disease mutation,epilepsy,glycoprotein,lysosome,neurodegeneration,neuronal ceroid lipofuscinosis,polymorphism,signal,	chain:Ceroid-lipofuscinosis neuronal protein 5,glycosylation site:N-linked (GlcNAc...),sequence variant,signal peptide,
ENSG00000131142	chemokine (C-C motif) ligand 25	Homo sapiens				GO:0006928~cell motion,GO:0006935~chemotaxis,GO:0006952~defense response,GO:0006954~inflammatory response,GO:0006955~immune response,GO:0007166~cell surface receptor linked signal transduction,GO:0007186~G-protein coupled receptor protein signaling pathway,GO:0007610~behavior,GO:0007626~locomotory behavior,GO:0009611~response to wounding,GO:0016477~cell migration,GO:0042330~taxis,GO:0048870~cell …	GO:0000267~cell fraction,GO:0005576~extracellular region,GO:0005615~extracellular space,GO:0005625~soluble fraction,GO:0044421~extracellular region part,	GO:0005125~cytokine activity,GO:0005179~hormone activity,GO:0008009~chemokine activity,GO:0042379~chemokine receptor binding,	IPR000827:Small chemokine, C-C group, conserved site,IPR001811:Small chemokine, interleukin-8-like,	hsa04060:Cytokine-cytokine receptor interaction,hsa04062:Chemokine signaling pathway,hsa04672:Intestinal immune network for IgA production,		PIRSF001950:small inducible chemokine, C/CC types,	SM00199:SCY,	alternative splicing,chemotaxis,complete proteome,cytokine,disulfide bond,inflammatory response,polymorphism,Secreted,signal,	chain:C-C motif chemokine 25,disulfide bond,sequence variant,signal peptide,splice variant,
ENSG00000168539	cholinergic receptor, muscarinic 1	Homo sapiens		h_agrPathway:Agrin in Postsynaptic Differentiation,h_botulinPathway:Blockade of Neurotransmitter Relase by Botulinum Toxin,h_no1Pathway:Actions of Nitric Oxide in the Heart,h_tubbyPathway:G-Protein Signaling Through Tubby Proteins,		GO:0007166~cell surface receptor linked signal transduction,GO:0007186~G-protein coupled receptor protein signaling pathway,GO:0007200~activation of phospholipase C activity by G-protein coupled receptor protein signaling pathway coupled to IP3 second messenger,GO:0007202~activation of phospholipase C activity,GO:0007205~activation of protein kinase C activity by G-protein coupled receptor protei…	GO:0000267~cell fraction,GO:0005624~membrane fraction,GO:0005626~insoluble fraction,GO:0005856~cytoskeleton,GO:0005886~plasma membrane,GO:0005887~integral to plasma membrane,GO:0014069~postsynaptic density,GO:0016021~integral to membrane,GO:0030054~cell junction,GO:0030424~axon,GO:0030425~dendrite,GO:0031224~intrinsic to membrane,GO:0031226~intrinsic to plasma membrane,GO:0032279~asymmetric synap…	GO:0004435~phosphoinositide phospholipase C activity,GO:0004620~phospholipase activity,GO:0004629~phospholipase C activity,GO:0004981~muscarinic acetylcholine receptor activity,GO:0008081~phosphoric diester hydrolase activity,GO:0008144~drug binding,GO:0008227~amine receptor activity,GO:0015464~acetylcholine receptor activity,GO:0016298~lipase activity,GO:0016907~G-protein coupled acetylcholine r…	IPR000276:7TM GPCR, rhodopsin-like,IPR000995:Muscarinic acetylcholine receptor,IPR002228:Muscarinic acetylcholine receptor M1,IPR017452:GPCR, rhodopsin-like superfamily,	hsa04020:Calcium signaling pathway,hsa04080:Neuroactive ligand-receptor interaction,hsa04810:Regulation of actin cytoskeleton,		PIRSF038548:muscarinic acetylcholine receptor,PIRSF800006:rhodopsin-like G protein-coupled receptors,		cell junction,cell membrane,complete proteome,disulfide bond,G protein-coupled receptor,g-protein coupled receptor,glycoprotein,membrane,neurotransmitter receptor,phosphoprotein,postsynaptic cell membrane,receptor,synapse,transducer,transmembrane,transmembrane protein,	chain:Muscarinic acetylcholine receptor M1,disulfide bond,glycosylation site:N-linked (GlcNAc...),modified residue,sequence conflict,topological domain:Cytoplasmic,topological domain:Extracellular,transmembrane region,
ENSG00000173728	chromosome 1 open reading frame 100	Homo sapiens												alternative splicing,complete proteome,	chain:Uncharacterized protein C1orf100,splice variant,
ENSG00000171067	chromosome 11 open reading frame 24	Homo sapiens					GO:0016021~integral to membrane,GO:0031224~intrinsic to membrane,							complete proteome,glycoprotein,membrane,polymorphism,signal,transmembrane,	chain:Uncharacterized protein C11orf24,compositionally biased region:Pro-rich,glycosylation site:N-linked (GlcNAc...),sequence variant,signal peptide,topological domain:Cytoplasmic,topological domain:Extracellular,transmembrane region,
ENSG00000089916	chromosome 14 open reading frame 118	Homo sapiens					GO:0016021~integral to membrane,GO:0031224~intrinsic to membrane,				Framingham Heart Study 100K Project: genome-wide associations for blood pressure and arterial stiffness,			alternative splicing,complete proteome,membrane,phosphoprotein,polymorphism,transmembrane,	chain:Uncharacterized protein C14orf118,compositionally biased region:Arg-rich,modified residue,sequence conflict,sequence variant,splice variant,transmembrane region,
ENSG00000119669	chromosome 14 open reading frame 4	Homo sapiens												3d-structure,coiled coil,complete proteome,nucleus,phosphoprotein,polymorphism,triplet repeat expansion,	chain:Enhanced at puberty protein 1,compositionally biased region:Gly/Pro-rich,compositionally biased region:Poly-Ala,compositionally biased region:Poly-Gln,compositionally biased region:Pro-rich,helix,modified residue,mutagenesis site,region of interest:Cys-rich,sequence conflict,strand,
ENSG00000206026	chromosome 18 open reading frame 62	Homo sapiens					GO:0016021~integral to membrane,GO:0031224~intrinsic to membrane,							complete proteome,membrane,transmembrane,	chain:Putative uncharacterized protein C18orf62,transmembrane region,
ENSG00000123144	chromosome 19 open reading frame 43	Homo sapiens												acetylation,complete proteome,phosphoprotein,	chain:Uncharacterized protein C19orf43,compositionally biased region:Poly-Gly,modified residue,
ENSG00000170279	chromosome 7 open reading frame 33	Homo sapiens												complete proteome,	chain:Uncharacterized protein C7orf33,
ENSG00000106603	chromosome 7 open reading frame 44	Homo sapiens					GO:0016021~integral to membrane,GO:0031224~intrinsic to membrane,							complete proteome,membrane,transmembrane,	chain:Uncharacterized protein C7orf44,sequence conflict,transmembrane region,
ENSG00000107020	chromosome 9 open reading frame 46	Homo sapiens					GO:0016021~integral to membrane,GO:0031224~intrinsic to membrane,		IPR019319:Protein of unknown function DUF2368,					complete proteome,membrane,transmembrane,	chain:Transmembrane protein C9orf46,sequence conflict,transmembrane region,
ENSG00000162592	coiled-coil domain containing 27	Homo sapiens												coiled coil,complete proteome,polymorphism,	chain:Coiled-coil domain-containing protein 27,compositionally biased region:Glu-rich,sequence conflict,sequence variant,
ENSG00000175602	coiled-coil domain containing 85B	Homo sapiens				GO:0001558~regulation of cell growth,GO:0008361~regulation of cell size,GO:0009890~negative regulation of biosynthetic process,GO:0010558~negative regulation of macromolecule biosynthetic process,GO:0010605~negative regulation of macromolecule metabolic process,GO:0010629~negative regulation of gene expression,GO:0016481~negative regulation of transcription,GO:0030308~negative regulation of cell …	GO:0005813~centrosome,GO:0005815~microtubule organizing center,GO:0005856~cytoskeleton,GO:0015630~microtubule cytoskeleton,GO:0043228~non-membrane-bounded organelle,GO:0043232~intracellular non-membrane-bounded organelle,GO:0044430~cytoskeletal part,		IPR019359:Protein of unknown function DUF2216,					coiled coil,complete proteome,cytoplasm,cytoskeleton,differentiation,growth regulation,nucleus,repressor,Transcription,transcription regulation,	chain:Coiled-coil domain-containing protein 85B,mutagenesis site,sequence conflict,
ENSG00000172346	cold shock domain containing C2, RNA binding	Homo sapiens				GO:0006355~regulation of transcription, DNA-dependent,GO:0006396~RNA processing,GO:0006397~mRNA processing,GO:0006398~histone mRNA 3'-end processing,GO:0008334~histone mRNA metabolic process,GO:0016071~mRNA metabolic process,GO:0031123~RNA 3'-end processing,GO:0031124~mRNA 3'-end processing,GO:0045449~regulation of transcription,GO:0051252~regulation of RNA metabolic process,	GO:0005794~Golgi apparatus,	GO:0003677~DNA binding,GO:0003723~RNA binding,	IPR002059:Cold-shock protein, DNA-binding,IPR011129:Cold shock protein,IPR012340:Nucleic acid-binding, OB-fold,IPR019844:Cold-shock conserved site,			PIRSF038320:calcium-regulated heat stable protein 1,	SM00357:CSP,	complete proteome,cytoplasm,mrna processing,nucleus,rna-binding,	chain:Cold shock domain-containing protein C2,domain:CSD,
ENSG00000163499	crystallin, beta A2	Homo sapiens						GO:0005198~structural molecule activity,GO:0005212~structural constituent of eye lens,GO:0042802~identical protein binding,GO:0042803~protein homodimerization activity,GO:0046983~protein dimerization activity,	IPR001064:Beta and gamma crystallin,		Many sequence variants affecting diversity of adult human height,	PIRSF002281:beta/gamma crystallins,PIRSF500451:beta crystallin A,	SM00247:XTALbg,	complete proteome,duplication,eye lens protein,repeat,	chain:Beta-crystallin A2,domain:Beta/gamma crystallin 'Greek key' 1,domain:Beta/gamma crystallin 'Greek key' 2,domain:Beta/gamma crystallin 'Greek key' 3,domain:Beta/gamma crystallin 'Greek key' 4,region of interest:Connecting peptide,region of interest:N-terminal arm,sequence conflict,
ENSG00000100243	cytochrome b5 reductase 3	Homo sapiens				GO:0003013~circulatory system process,GO:0006694~steroid biosynthetic process,GO:0006695~cholesterol biosynthetic process,GO:0008015~blood circulation,GO:0008202~steroid metabolic process,GO:0008203~cholesterol metabolic process,GO:0008610~lipid biosynthetic process,GO:0016125~sterol metabolic process,GO:0016126~sterol biosynthetic process,GO:0055114~oxidation reduction,	GO:0005739~mitochondrion,GO:0005740~mitochondrial envelope,GO:0005741~mitochondrial outer membrane,GO:0005743~mitochondrial inner membrane,GO:0005783~endoplasmic reticulum,GO:0005789~endoplasmic reticulum membrane,GO:0005829~cytosol,GO:0005833~hemoglobin complex,GO:0005886~plasma membrane,GO:0009898~internal side of plasma membrane,GO:0012505~endomembrane system,GO:0019866~organelle inner membran…	GO:0004128~cytochrome-b5 reductase activity,GO:0009055~electron carrier activity,GO:0016651~oxidoreductase activity, acting on NADH or NADPH,GO:0016653~oxidoreductase activity, acting on NADH or NADPH, heme protein as acceptor,	IPR001433:Oxidoreductase FAD/NAD(P)-binding,IPR001709:Flavoprotein pyridine nucleotide cytochrome reductase,IPR001834:NADH:cytochrome b5 reductase (CBR),IPR008333:Oxidoreductase FAD-binding region,IPR017927:Ferredoxin reductase-type FAD-binding domain,	hsa00520:Amino sugar and nucleotide sugar metabolism,	Methemoglobinemia, type I,Methemoglobinemia, type II,	PIRSF000206:cytochrome-b5 reductase,		3d-structure,acetylation,alternative promoter usage,blocked amino end,Cholesterol biosynthesis,complete proteome,cytoplasm,direct protein sequencing,disease mutation,endoplasmic reticulum,FAD,Flavoprotein,lipid synthesis,lipoprotein,membrane,membrane protein,mitochondrion,mitochondrion outer membrane,myristate,myristylation,nad,oxidoreductase,phosphoprotein,polymorphism,Steroid biosynthesis,stero…	chain:NADH-cytochrome b5 reductase 3 membrane- bound form,chain:NADH-cytochrome b5 reductase 3 soluble form,domain:FAD-binding FR-type,helix,lipid moiety-binding region:N-myristoyl glycine,modified residue,nucleotide phosphate-binding region:FAD,sequence conflict,sequence variant,splice variant,strand,turn,
ENSG00000109016	dehydrogenase/reductase (SDR family) member 7B	Homo sapiens			General function prediction only,	GO:0055114~oxidation reduction,	GO:0005777~peroxisome,GO:0016021~integral to membrane,GO:0031224~intrinsic to membrane,GO:0042579~microbody,		IPR002198:Short-chain dehydrogenase/reductase SDR,IPR002347:Glucose/ribitol dehydrogenase,IPR016040:NAD(P)-binding domain,					complete proteome,membrane,nad,nadp,oxidoreductase,peroxisome,Signal-anchor,transmembrane,	active site:Proton acceptor,binding site:Substrate,chain:Dehydrogenase/reductase SDR family member 7B,nucleotide phosphate-binding region:NAD or NADP,sequence conflict,topological domain:Cytoplasmic,topological domain:Peroxisomal,transmembrane region,
ENSG00000187569	developmental pluripotency associated 3	Homo sapiens												complete proteome,cytoplasm,nucleus,polymorphism,	chain:Developmental pluripotency-associated protein 3,sequence conflict,sequence variant,
ENSG00000149927	double C2-like domains, alpha	Homo sapiens				GO:0001505~regulation of neurotransmitter levels,GO:0003001~generation of a signal involved in cell-cell signaling,GO:0006836~neurotransmitter transport,GO:0006887~exocytosis,GO:0007267~cell-cell signaling,GO:0007268~synaptic transmission,GO:0007269~neurotransmitter secretion,GO:0016079~synaptic vesicle exocytosis,GO:0016192~vesicle-mediated transport,GO:0017157~regulation of exocytosis,GO:001715…	GO:0000267~cell fraction,GO:0000323~lytic vacuole,GO:0005624~membrane fraction,GO:0005626~insoluble fraction,GO:0005764~lysosome,GO:0005773~vacuole,GO:0005886~plasma membrane,GO:0008021~synaptic vesicle,GO:0016023~cytoplasmic membrane-bounded vesicle,GO:0019717~synaptosome,GO:0019898~extrinsic to membrane,GO:0030054~cell junction,GO:0030135~coated vesicle,GO:0030136~clathrin-coated vesicle,GO:003…	GO:0005509~calcium ion binding,GO:0005543~phospholipid binding,GO:0005544~calcium-dependent phospholipid binding,GO:0008289~lipid binding,GO:0043167~ion binding,GO:0043169~cation binding,GO:0046872~metal ion binding,	IPR000008:C2 calcium-dependent membrane targeting,IPR001565:Synaptotagmin,IPR014638:Double C2 protein, alpha/beta/gamma type,IPR018029:C2 membrane targeting protein,			PIRSF036931:Doc2,PIRSF036931:double C2 protein, alpha/beta/gamma types,	SM00239:C2,	calcium,calcium binding,calcium/phospholipid-binding,cell junction,complete proteome,cytoplasmic vesicle,exocytosis,lysosome,membrane,polymorphism,repeat,synapse,Synaptosome,	chain:Double C2-like domain-containing protein alpha,domain:C2 1,domain:C2 2,region of interest:Interaction with UNC13D,sequence conflict,sequence variant,
ENSG00000133059	dual serine/threonine and tyrosine protein kinase	Homo sapiens				GO:0006468~protein amino acid phosphorylation,GO:0006793~phosphorus metabolic process,GO:0006796~phosphate metabolic process,GO:0016310~phosphorylation,		GO:0000166~nucleotide binding,GO:0001882~nucleoside binding,GO:0001883~purine nucleoside binding,GO:0004672~protein kinase activity,GO:0004674~protein serine/threonine kinase activity,GO:0004713~protein tyrosine kinase activity,GO:0005524~ATP binding,GO:0017076~purine nucleotide binding,GO:0030554~adenyl nucleotide binding,GO:0032553~ribonucleotide binding,GO:0032555~purine ribonucleotide binding…	IPR000719:Protein kinase, core,IPR008271:Serine/threonine protein kinase, active site,IPR017441:Protein kinase, ATP binding site,IPR017442:Serine/threonine protein kinase-related,					alternative splicing,atp-binding,coiled coil,complete proteome,cytoplasm,kinase,nucleotide-binding,phosphoprotein,polymorphism,serine/threonine-protein kinase,transferase,tyrosine-protein kinase,	active site:Proton acceptor,binding site:ATP,chain:Dual serine/threonine and tyrosine protein kinase,compositionally biased region:Poly-Gly,domain:Protein kinase,modified residue,mutagenesis site,nucleotide phosphate-binding region:ATP,sequence conflict,sequence variant,splice variant,
ENSG00000162999	dual specificity phosphatase 19	Homo sapiens				GO:0000165~MAPKKK cascade,GO:0000188~inactivation of MAPK activity,GO:0006469~negative regulation of protein kinase activity,GO:0006470~protein amino acid dephosphorylation,GO:0006793~phosphorus metabolic process,GO:0006796~phosphate metabolic process,GO:0007242~intracellular signaling cascade,GO:0007243~protein kinase cascade,GO:0007254~JNK cascade,GO:0016311~dephosphorylation,GO:0019220~regulat…		GO:0004721~phosphoprotein phosphatase activity,GO:0004725~protein tyrosine phosphatase activity,GO:0008138~protein tyrosine/serine/threonine phosphatase activity,GO:0008330~protein tyrosine/threonine phosphatase activity,GO:0008579~JUN kinase phosphatase activity,GO:0016791~phosphatase activity,	IPR000340:Dual specificity phosphatase, catalytic domain,IPR000340:Protein-tyrosine phosphatase, dual specificity,IPR000387:Dual-specific/protein-tyrosine phosphatase, conserved region,IPR000387:Protein-tyrosine phosphatase,IPR016130:Protein-tyrosine phosphatase, active site,				SM00195:DSPc,	alternative splicing,complete proteome,hydrolase,polymorphism,protein phosphatase,	active site:Phosphocysteine intermediate,chain:Dual specificity protein phosphatase 19,domain:Tyrosine-protein phosphatase,sequence variant,splice variant,
ENSG00000119661	dynein, axonemal, light chain 1	Homo sapiens			Function unknown,					hsa05016:Huntington's disease,				alternative splicing,complete proteome,leucine-rich repeat,repeat,	chain:Dynein light chain 1, axonemal,repeat:LRR 1,repeat:LRR 2,repeat:LRR 3,repeat:LRR 4,splice variant,
ENSG00000197102	dynein, cytoplasmic 1, heavy chain 1	Homo sapiens			Cytoskeleton,	GO:0000226~microtubule cytoskeleton organization,GO:0000278~mitotic cell cycle,GO:0000279~M phase,GO:0007010~cytoskeleton organization,GO:0007017~microtubule-based process,GO:0007018~microtubule-based movement,GO:0007049~cell cycle,GO:0007051~spindle organization,GO:0007052~mitotic spindle organization,GO:0022402~cell cycle process,GO:0022403~cell cycle phase,	GO:0005794~Golgi apparatus,GO:0005829~cytosol,GO:0005856~cytoskeleton,GO:0005868~cytoplasmic dynein complex,GO:0005874~microtubule,GO:0005875~microtubule associated complex,GO:0015630~microtubule cytoskeleton,GO:0030286~dynein complex,GO:0043228~non-membrane-bounded organelle,GO:0043232~intracellular non-membrane-bounded organelle,GO:0044430~cytoskeletal part,	GO:0000166~nucleotide binding,GO:0001882~nucleoside binding,GO:0001883~purine nucleoside binding,GO:0003774~motor activity,GO:0003777~microtubule motor activity,GO:0005524~ATP binding,GO:0016887~ATPase activity,GO:0017076~purine nucleotide binding,GO:0030554~adenyl nucleotide binding,GO:0032553~ribonucleotide binding,GO:0032555~purine ribonucleotide binding,GO:0032559~adenyl ribonucleotide bindin…	IPR003593:ATPase, AAA+ type, core,IPR004273:Dynein heavy chain,IPR011704:ATPase associated with various cellular activities, AAA-5,IPR013594:Dynein heavy chain, N-terminal region 1,IPR013602:Dynein heavy chain, N-terminal region 2,			PIRSF002307:dynein heavy chain, cytosolic,	SM00382:AAA,	3d-structure,acetylation,ATP,atp-binding,coiled coil,complete proteome,cytoplasm,cytosol,dynein,hydrolase,microtubule,mitosis,motor protein,nucleotide binding,nucleotide-binding,P-loop,phosphoprotein,polymorphism,repeat,	chain:Cytoplasmic dynein 1 heavy chain 1,modified residue,nucleotide phosphate-binding region:ATP,region of interest:AAA 1,region of interest:AAA 2,region of interest:AAA 3,region of interest:AAA 4,region of interest:AAA 5,region of interest:AAA 6,region of interest:Stalk,region of interest:Stem,sequence conflict,sequence variant,
ENSG00000135960	ectodysplasin A receptor	Homo sapiens				GO:0001942~hair follicle development,GO:0006915~apoptosis,GO:0007398~ectoderm development,GO:0007431~salivary gland development,GO:0008219~cell death,GO:0008544~epidermis development,GO:0012501~programmed cell death,GO:0016265~death,GO:0022404~molting cycle process,GO:0022405~hair cycle process,GO:0032386~regulation of intracellular transport,GO:0032388~positive regulation of intracellular transp…	GO:0005886~plasma membrane,GO:0016021~integral to membrane,GO:0031224~intrinsic to membrane,GO:0045177~apical part of cell,		IPR000488:Death,IPR001368:TNFR/CD27/30/40/95 cysteine-rich region,	hsa04060:Cytokine-cytokine receptor interaction,	Ectodermal dysplasia, hypohidrotic, autosomal dominant,Ectodermal dysplasia, hypohidrotic, autosomal recessive,Hair morphology 1, hair thickness,Hair morphology 1, hair thickness] 612630,		SM00005:DEATH,SM00208:TNFR,	Apoptosis,complete proteome,developmental protein,differentiation,direct protein sequencing,disease mutation,disulfide bond,ectodermal dysplasia,glycoprotein,membrane,phosphoprotein,polymorphism,receptor,repeat,signal,transmembrane,	chain:Tumor necrosis factor receptor superfamily member EDAR,disulfide bond,domain:Death,glycosylation site:N-linked (GlcNAc...),modified residue,mutagenesis site,repeat:TNFR-Cys 1,repeat:TNFR-Cys 2,repeat:TNFR-Cys 3,sequence conflict,sequence variant,signal peptide,topological domain:Cytoplasmic,topological domain:Extracellular,transmembrane region,
ENSG00000106462	enhancer of zeste homolog 2 (Drosophila)	Homo sapiens		h_prc2Pathway:The PRC2 Complex Sets Long-term Gene Silencing Through Modification of Histone Tails,		GO:0006325~chromatin organization,GO:0006350~transcription,GO:0006355~regulation of transcription, DNA-dependent,GO:0006479~protein amino acid methylation,GO:0006730~one-carbon metabolic process,GO:0008213~protein amino acid alkylation,GO:0009968~negative regulation of signal transduction,GO:0010648~negative regulation of cell communication,GO:0016568~chromatin modification,GO:0016569~covalent ch…	GO:0005654~nucleoplasm,GO:0031519~PcG protein complex,GO:0031974~membrane-enclosed lumen,GO:0031981~nuclear lumen,GO:0034708~methyltransferase complex,GO:0035097~histone methyltransferase complex,GO:0035098~ESC/E(Z) complex,GO:0043233~organelle lumen,GO:0044451~nucleoplasm part,GO:0045120~pronucleus,GO:0070013~intracellular organelle lumen,	GO:0003677~DNA binding,GO:0003682~chromatin binding,GO:0008170~N-methyltransferase activity,GO:0008276~protein methyltransferase activity,GO:0016278~lysine N-methyltransferase activity,GO:0016279~protein-lysine N-methyltransferase activity,GO:0016564~transcription repressor activity,GO:0018024~histone-lysine N-methyltransferase activity,GO:0030528~transcription regulator activity,GO:0042054~histo…	IPR001005:SANT, DNA-binding,IPR001214:SET,				SM00317:SET,SM00717:SANT,	3d-structure,chromatin regulator,complete proteome,methyltransferase,nucleus,phosphoprotein,polymorphism,repressor,s-adenosyl-l-methionine,Transcription,transcription regulation,transferase,	chain:Histone-lysine N-methyltransferase EZH2,compositionally biased region:Cys-rich,domain:SET,modified residue,mutagenesis site,region of interest:Interaction with DNMT1, DNMT3A and DNMT3B,region of interest:Interaction with EED,sequence conflict,sequence variant,
ENSG00000127884	enoyl Coenzyme A hydratase, short chain, 1, mitochondrial	Homo sapiens			Lipid metabolism,	GO:0006631~fatty acid metabolic process,GO:0006635~fatty acid beta-oxidation,GO:0009062~fatty acid catabolic process,GO:0016042~lipid catabolic process,GO:0016054~organic acid catabolic process,GO:0019395~fatty acid oxidation,GO:0030258~lipid modification,GO:0034440~lipid oxidation,GO:0044242~cellular lipid catabolic process,GO:0046395~carboxylic acid catabolic process,	GO:0005739~mitochondrion,GO:0005759~mitochondrial matrix,GO:0031974~membrane-enclosed lumen,GO:0031980~mitochondrial lumen,GO:0043233~organelle lumen,GO:0044429~mitochondrial part,GO:0070013~intracellular organelle lumen,	GO:0004300~enoyl-CoA hydratase activity,GO:0016836~hydro-lyase activity,	IPR001753:Crotonase, core,IPR018376:Enoyl-CoA hydratase/isomerase, conserved site,	hsa00062:Fatty acid elongation in mitochondria,hsa00071:Fatty acid metabolism,hsa00280:Valine, leucine and isoleucine degradation,hsa00310:Lysine degradation,hsa00380:Tryptophan metabolism,hsa00410:beta-Alanine metabolism,hsa00640:Propanoate metabolism,hsa00650:Butanoate metabolism,hsa00903:Limonene and pinene degradation,				3d-structure,acetylation,complete proteome,direct protein sequencing,fatty acid metabolism,lipid metabolism,lyase,mitochondrion,polymorphism,transit peptide,	binding site:Substrate; via amide nitrogen,chain:Enoyl-CoA hydratase, mitochondrial,helix,modified residue,region of interest:Substrate binding,sequence conflict,sequence variant,site:Important for catalytic activity,strand,transit peptide:Mitochondrion,turn,
ENSG00000079819	erythrocyte membrane protein band 4.1-like 2	Homo sapiens				GO:0007010~cytoskeleton organization,GO:0030029~actin filament-based process,GO:0030036~actin cytoskeleton organization,GO:0030865~cortical cytoskeleton organization,GO:0030866~cortical actin cytoskeleton organization,	GO:0005856~cytoskeleton,GO:0005886~plasma membrane,GO:0005938~cell cortex,GO:0008091~spectrin,GO:0015629~actin cytoskeleton,GO:0019898~extrinsic to membrane,GO:0030863~cortical cytoskeleton,GO:0030864~cortical actin cytoskeleton,GO:0043228~non-membrane-bounded organelle,GO:0043232~intracellular non-membrane-bounded organelle,GO:0044430~cytoskeletal part,GO:0044448~cell cortex part,	GO:0003779~actin binding,GO:0005198~structural molecule activity,GO:0008092~cytoskeletal protein binding,	IPR000299:FERM domain,IPR000798:Ezrin/radixin/moesin ERM,IPR007477:SAB,IPR008379:Band 4.1, C-terminal,IPR011993:Pleckstrin homology-type,IPR014352:FERM/acyl-CoA-binding protein, 3-helical bundle,IPR014847:FERM adjacent (FA),IPR018979:FERM, N-terminal,IPR018980:FERM, C-terminal PH-like domain,IPR019747:FERM conserved site,IPR019748:FERM central domain,IPR019749:Band 4.1 domain,IPR019750:Band 4.1 s…	hsa04530:Tight junction,		PIRSF002304:membrane skeletal protein 4.1,	SM00295:B41,	acetylation,actin-binding,complete proteome,cytoplasm,cytoskeleton,direct protein sequencing,phosphoprotein,polymorphism,	chain:Band 4.1-like protein 2,domain:FERM,modified residue,region of interest:Carboxyl-terminal (CTD),region of interest:Hydrophilic,region of interest:Spectrin--actin-binding,sequence variant,
ENSG00000148730	eukaryotic translation initiation factor 4E binding protein 2	Homo sapiens				GO:0006412~translation,GO:0006417~regulation of translation,GO:0006446~regulation of translational initiation,GO:0007166~cell surface receptor linked signal transduction,GO:0007167~enzyme linked receptor protein signaling pathway,GO:0007169~transmembrane receptor protein tyrosine kinase signaling pathway,GO:0007242~intracellular signaling cascade,GO:0008286~insulin receptor signaling pathway,GO:0…		GO:0008190~eukaryotic initiation factor 4E binding,GO:0031369~translation initiation factor binding,	IPR008606:Eukaryotic translation initiation factor 4E binding,			PIRSF016057:eukaryotic translation initiation factor 4E-binding protein,		complete proteome,phosphoprotein,protein synthesis inhibitor,translation regulation,	chain:Eukaryotic translation initiation factor 4E-binding protein 2,modified residue,
ENSG00000178896	exosome component 4	Homo sapiens				GO:0006364~rRNA processing,GO:0006396~RNA processing,GO:0016072~rRNA metabolic process,GO:0022613~ribonucleoprotein complex biogenesis,GO:0034470~ncRNA processing,GO:0034660~ncRNA metabolic process,GO:0042254~ribosome biogenesis,	GO:0000178~exosome (RNase complex),GO:0005730~nucleolus,GO:0031974~membrane-enclosed lumen,GO:0031981~nuclear lumen,GO:0043228~non-membrane-bounded organelle,GO:0043232~intracellular non-membrane-bounded organelle,GO:0043233~organelle lumen,GO:0070013~intracellular organelle lumen,	GO:0000175~3'-5'-exoribonuclease activity,GO:0003723~RNA binding,GO:0004518~nuclease activity,GO:0004527~exonuclease activity,GO:0004532~exoribonuclease activity,GO:0004540~ribonuclease activity,GO:0008408~3'-5' exonuclease activity,GO:0016796~exonuclease activity, active with either ribo- or deoxyribonucleic acids and producing 5'-phosphomonoesters,GO:0016896~exoribonuclease activity, producing …	IPR001247:Exoribonuclease, phosphorolytic domain 1,IPR015847:Exoribonuclease, phosphorolytic domain 2,	hsa03018:RNA degradation,		PIRSF001017:tRNA nucleotidyltransferase,PIRSF500097:exosomal 3'-5' exoribonuclease complex, Rrp41 subunit,		3d-structure,acetylation,complete proteome,cytoplasm,direct protein sequencing,exonuclease,exosome,hydrolase,nuclease,nucleus,rna-binding,rrna processing,	chain:Exosome complex exonuclease RRP41,helix,modified residue,strand,turn,
ENSG00000189057	family with sequence similarity 111, member B	Homo sapiens												alternative splicing,complete proteome,polymorphism,	chain:Protein FAM111B,sequence conflict,sequence variant,splice variant,
ENSG00000185442	family with sequence similarity 174, member B	Homo sapiens					GO:0016021~integral to membrane,GO:0031224~intrinsic to membrane,		IPR009565:Protein of unknown function DUF1180,					complete proteome,glycoprotein,membrane,polymorphism,signal,transmembrane,	chain:Membrane protein FAM174B,glycosylation site:N-linked (GlcNAc...),sequence conflict,sequence variant,signal peptide,topological domain:Cytoplasmic,topological domain:Extracellular,transmembrane region,
ENSG00000184599	family with sequence similarity 19 (chemokine (C-C motif)-like), member A3	Homo sapiens					GO:0005576~extracellular region,							alternative splicing,complete proteome,Secreted,signal,	chain:Protein FAM19A3,signal peptide,splice variant,
ENSG00000128573	forkhead box P2	Homo sapiens				GO:0000122~negative regulation of transcription from RNA polymerase II promoter,GO:0001654~eye development,GO:0002053~positive regulation of mesenchymal cell proliferation,GO:0006350~transcription,GO:0006355~regulation of transcription, DNA-dependent,GO:0006357~regulation of transcription from RNA polymerase II promoter,GO:0007423~sensory organ development,GO:0007517~muscle organ development,GO:0…		GO:0003677~DNA binding,GO:0003700~transcription factor activity,GO:0008270~zinc ion binding,GO:0016564~transcription repressor activity,GO:0016566~specific transcriptional repressor activity,GO:0030528~transcription regulator activity,GO:0042802~identical protein binding,GO:0042803~protein homodimerization activity,GO:0043167~ion binding,GO:0043169~cation binding,GO:0043565~sequence-specific DNA …	IPR001766:Transcription factor, fork head,IPR007087:Zinc finger, C2H2-type,IPR011991:Winged helix repressor DNA-binding,IPR013087:Zinc finger, C2H2-type/integrase, DNA-binding,IPR015880:Zinc finger, C2H2-like,IPR018122:Transcription factor, fork head, conserved site,		Speech-language disorder-1,		SM00339:FH,SM00355:ZnF_C2H2,	3d-structure,alternative splicing,chromosomal rearrangement,coiled coil,complete proteome,disease mutation,dna-binding,metal-binding,nucleus,repressor,Transcription,transcription regulation,zinc,zinc-finger,	chain:Forkhead box protein P2,compositionally biased region:Poly-Gln,DNA-binding region:Fork-head,domain:Leucine-zipper,helix,region of interest:CTBP1-binding,sequence conflict,sequence variant,splice variant,strand,zinc finger region:C2H2-type,
ENSG00000163251	frizzled homolog 5 (Drosophila)	Homo sapiens				GO:0007164~establishment of tissue polarity,GO:0007166~cell surface receptor linked signal transduction,GO:0007186~G-protein coupled receptor protein signaling pathway,GO:0016055~Wnt receptor signaling pathway,GO:0021700~developmental maturation,GO:0048469~cell maturation,	GO:0005794~Golgi apparatus,GO:0005886~plasma membrane,GO:0005887~integral to plasma membrane,GO:0016021~integral to membrane,GO:0031224~intrinsic to membrane,GO:0031226~intrinsic to plasma membrane,GO:0044459~plasma membrane part,		IPR000024:Frizzled cysteine-rich domain,IPR000539:Frizzled protein,IPR015526:Frizzled related,IPR017981:GPCR, family 2-like,	hsa04310:Wnt signaling pathway,hsa04916:Melanogenesis,hsa05200:Pathways in cancer,hsa05210:Colorectal cancer,hsa05217:Basal cell carcinoma,				cell membrane,complete proteome,developmental protein,disulfide bond,g-protein coupled receptor,glycoprotein,golgi apparatus,membrane,polymorphism,receptor,signal,transducer,transmembrane,wnt signaling pathway,	chain:Frizzled-5,disulfide bond,domain:FZ,glycosylation site:N-linked (GlcNAc...),sequence conflict,sequence variant,short sequence motif:Lys-Thr-X-X-X-Trp motif,short sequence motif:PDZ-binding,signal peptide,topological domain:Cytoplasmic,topological domain:Extracellular,transmembrane region,
ENSG00000115042	fumarylacetoacetate hydrolase domain containing 2A	Homo sapiens			Secondary metabolites biosynthesis, transport, and catabolism,			GO:0000287~magnesium ion binding,GO:0005509~calcium ion binding,GO:0043167~ion binding,GO:0043169~cation binding,GO:0046872~metal ion binding,	IPR002529:Fumarylacetoacetase, C-terminal-like,IPR011234:Fumarylacetoacetase, C-terminal-related,			PIRSF005976:2-hydroxyhepta-2,4-diene-1,7-dioate isomerase,		calcium,complete proteome,hydrolase,magnesium,metal-binding,polymorphism,	chain:Fumarylacetoacetate hydrolase domain- containing protein 2A,sequence conflict,sequence variant,
ENSG00000142252	gem (nuclear organelle) associated protein 7	Homo sapiens				GO:0000375~RNA splicing, via transesterification reactions,GO:0000377~RNA splicing, via transesterification reactions with bulged adenosine as nucleophile,GO:0000387~spliceosomal snRNP biogenesis,GO:0000398~nuclear mRNA splicing, via spliceosome,GO:0006396~RNA processing,GO:0006397~mRNA processing,GO:0008380~RNA splicing,GO:0016071~mRNA metabolic process,GO:0022613~ribonucleoprotein complex bioge…	GO:0005654~nucleoplasm,GO:0005681~spliceosome,GO:0005829~cytosol,GO:0015030~Cajal body,GO:0016604~nuclear body,GO:0030529~ribonucleoprotein complex,GO:0031974~membrane-enclosed lumen,GO:0031981~nuclear lumen,GO:0043233~organelle lumen,GO:0044451~nucleoplasm part,GO:0070013~intracellular organelle lumen,							3d-structure,complete proteome,cytoplasm,direct protein sequencing,mrna processing,mrna splicing,nucleus,Spliceosome,	chain:Gem-associated protein 7,helix,strand,
ENSG00000182771	glutamate receptor, ionotropic, delta 1	Homo sapiens				GO:0006811~ion transport,	GO:0005886~plasma membrane,GO:0016021~integral to membrane,GO:0030054~cell junction,GO:0031224~intrinsic to membrane,GO:0044456~synapse part,GO:0044459~plasma membrane part,GO:0045202~synapse,GO:0045211~postsynaptic membrane,	GO:0004970~ionotropic glutamate receptor activity,GO:0005216~ion channel activity,GO:0005230~extracellular ligand-gated ion channel activity,GO:0005234~extracellular-glutamate-gated ion channel activity,GO:0008066~glutamate receptor activity,GO:0015267~channel activity,GO:0015276~ligand-gated ion channel activity,GO:0022803~passive transmembrane transporter activity,GO:0022834~ligand-gated channe…	IPR001320:Ionotropic glutamate receptor,IPR001508:NMDA receptor,IPR001828:Extracellular ligand-binding receptor,IPR015683:Glutamate receptor-related,IPR016160:Aldehyde dehydrogenase, conserved site,IPR019594:Glutamate receptor, L-glutamate/glycine-binding,	hsa04080:Neuroactive ligand-receptor interaction,		PIRSF037089:ionotropic glutamate receptor delta,	SM00079:PBPe,	cell junction,cell membrane,complete proteome,glycoprotein,ion transport,ionic channel,membrane,phosphoprotein,polymorphism,postsynaptic cell membrane,receptor,signal,synapse,transmembrane,transport,	chain:Glutamate receptor delta-1 subunit,glycosylation site:N-linked (GlcNAc...),modified residue,sequence variant,signal peptide,topological domain:Cytoplasmic,topological domain:Extracellular,transmembrane region,
ENSG00000006007	glycerophosphodiester phosphodiesterase 1	Homo sapiens				GO:0006071~glycerol metabolic process,GO:0019400~alditol metabolic process,GO:0019751~polyol metabolic process,	GO:0016021~integral to membrane,GO:0031224~intrinsic to membrane,	GO:0000287~magnesium ion binding,GO:0008081~phosphoric diester hydrolase activity,GO:0008889~glycerophosphodiester phosphodiesterase activity,GO:0043167~ion binding,GO:0043169~cation binding,GO:0046872~metal ion binding,GO:0047395~glycerophosphoinositol glycerophosphodiesterase activity,	IPR004129:Glycerophosphoryl diester phosphodiesterase,IPR017946:PLC-like phosphodiesterase, TIM beta/alpha-barrel domain,			PIRSF001115:glycerophosphoryl diester phosphodiesterase,		complete proteome,cytoplasm,glycoprotein,hydrolase,magnesium,membrane,metal-binding,polymorphism,transmembrane,	chain:Glycerophosphodiester phosphodiesterase 1,domain:GDPD,glycosylation site:N-linked (GlcNAc...),metal ion-binding site:Magnesium,sequence variant,topological domain:Cytoplasmic,topological domain:Lumenal,transmembrane region,
ENSG00000066455	golgi autoantigen, golgin subfamily a, 5	Homo sapiens			Function unknown,	GO:0000301~retrograde transport, vesicle recycling within Golgi,GO:0006468~protein amino acid phosphorylation,GO:0006793~phosphorus metabolic process,GO:0006796~phosphate metabolic process,GO:0006891~intra-Golgi vesicle-mediated transport,GO:0007030~Golgi organization,GO:0016192~vesicle-mediated transport,GO:0016310~phosphorylation,GO:0046907~intracellular transport,GO:0048193~Golgi vesicle trans…	GO:0000137~Golgi cis cisterna,GO:0000138~Golgi trans cisterna,GO:0000139~Golgi membrane,GO:0005794~Golgi apparatus,GO:0005795~Golgi stack,GO:0005797~Golgi medial cisterna,GO:0005798~Golgi-associated vesicle,GO:0005801~cis-Golgi network,GO:0012505~endomembrane system,GO:0012506~vesicle membrane,GO:0016021~integral to membrane,GO:0016023~cytoplasmic membrane-bounded vesicle,GO:0030135~coated vesicl…	GO:0000166~nucleotide binding,GO:0001882~nucleoside binding,GO:0001883~purine nucleoside binding,GO:0004672~protein kinase activity,GO:0004713~protein tyrosine kinase activity,GO:0005083~small GTPase regulator activity,GO:0005524~ATP binding,GO:0017016~Ras GTPase binding,GO:0017076~purine nucleotide binding,GO:0017137~Rab GTPase binding,GO:0019899~enzyme binding,GO:0030554~adenyl nucleotide bindi…	IPR019177:Golgin subfamily A member 5,		Thyroid carcinoma, papillary,			alternative splicing,ATP,chromosomal rearrangement,coiled coil,complete proteome,golgi apparatus,membrane,methylation,phosphoprotein,polymorphism,transmembrane,	chain:Golgin subfamily A member 5,modified residue,sequence conflict,sequence variant,site:Breakpoint for translocation to form RET- GOLGA5 oncogene,splice variant,topological domain:Cytoplasmic,topological domain:Lumenal,transmembrane region,
ENSG00000169813	heterogeneous nuclear ribonucleoprotein F	Homo sapiens				GO:0000375~RNA splicing, via transesterification reactions,GO:0000377~RNA splicing, via transesterification reactions with bulged adenosine as nucleophile,GO:0000398~nuclear mRNA splicing, via spliceosome,GO:0006396~RNA processing,GO:0006397~mRNA processing,GO:0008380~RNA splicing,GO:0016071~mRNA metabolic process,GO:0043484~regulation of RNA splicing,GO:0051252~regulation of RNA metabolic proces…	GO:0005654~nucleoplasm,GO:0005681~spliceosome,GO:0005730~nucleolus,GO:0030529~ribonucleoprotein complex,GO:0030530~heterogeneous nuclear ribonucleoprotein complex,GO:0031974~membrane-enclosed lumen,GO:0031981~nuclear lumen,GO:0043228~non-membrane-bounded organelle,GO:0043232~intracellular non-membrane-bounded organelle,GO:0043233~organelle lumen,GO:0070013~intracellular organelle lumen,	GO:0000166~nucleotide binding,GO:0003723~RNA binding,GO:0017025~TATA-binding protein binding,	IPR000504:RNA recognition motif, RNP-1,IPR012677:Nucleotide-binding, alpha-beta plait,IPR012996:Zinc finger, CHHC-type,				SM00360:RRM,	3d-structure,acetylation,complete proteome,direct protein sequencing,isopeptide bond,mrna processing,mrna splicing,nucleus,phosphoprotein,polymorphism,repeat,ribonucleoprotein,rna-binding,Spliceosome,ubl conjugation,viral nucleoprotein,	chain:Heterogeneous nuclear ribonucleoprotein F,chain:Heterogeneous nuclear ribonucleoprotein F, N-terminally processed,cross-link:Glycyl lysine isopeptide (Lys-Gly) (interchain with G-Cter in SUMO),domain:RRM 1,domain:RRM 2,domain:RRM 3,helix,modified residue,mutagenesis site,sequence variant,site:Required for RNA recognition,strand,turn,
ENSG00000182611	histone cluster 1, H2aj	Homo sapiens				GO:0006323~DNA packaging,GO:0006325~chromatin organization,GO:0006333~chromatin assembly or disassembly,GO:0006334~nucleosome assembly,GO:0031497~chromatin assembly,GO:0034621~cellular macromolecular complex subunit organization,GO:0034622~cellular macromolecular complex assembly,GO:0034728~nucleosome organization,GO:0043933~macromolecular complex subunit organization,GO:0051276~chromosome organi…	GO:0000785~chromatin,GO:0000786~nucleosome,GO:0005694~chromosome,GO:0032993~protein-DNA complex,GO:0043228~non-membrane-bounded organelle,GO:0043232~intracellular non-membrane-bounded organelle,GO:0044427~chromosomal part,	GO:0003677~DNA binding,	IPR002119:Histone H2A,IPR007125:Histone core,	hsa05322:Systemic lupus erythematosus,		PIRSF002048:histone H2A,	SM00414:H2A,	acetylation,chromosomal protein,citrullination,complete proteome,dna-binding,isopeptide bond,methylation,nucleosome core,nucleus,phosphoprotein,ubl conjugation,	chain:Histone H2A type 1-J,cross-link:Glycyl lysine isopeptide (Lys-Gly) (interchain with G-Cter in ubiquitin),modified residue,mutagenesis site,
ENSG00000068024	histone deacetylase 4	Homo sapiens		h_ranbp2Pathway:Sumoylation by RanBP2 Regulates Transcriptional Repression,	Chromatin structure and dynamics / Secondary metabolites biosynthesis, transport, and catabolism,	GO:0000122~negative regulation of transcription from RNA polymerase II promoter,GO:0001501~skeletal system development,GO:0001775~cell activation,GO:0002520~immune system development,GO:0002521~leukocyte differentiation,GO:0003012~muscle system process,GO:0006109~regulation of carbohydrate metabolic process,GO:0006110~regulation of glycolysis,GO:0006325~chromatin organization,GO:0006338~chromatin…	GO:0000118~histone deacetylase complex,GO:0005654~nucleoplasm,GO:0016585~chromatin remodeling complex,GO:0017053~transcriptional repressor complex,GO:0030016~myofibril,GO:0030017~sarcomere,GO:0031974~membrane-enclosed lumen,GO:0031981~nuclear lumen,GO:0043233~organelle lumen,GO:0043292~contractile fiber,GO:0044449~contractile fiber part,GO:0044451~nucleoplasm part,GO:0070013~intracellular organel…	GO:0003677~DNA binding,GO:0004407~histone deacetylase activity,GO:0008134~transcription factor binding,GO:0008270~zinc ion binding,GO:0010843~promoter binding,GO:0016563~transcription activator activity,GO:0016564~transcription repressor activity,GO:0016566~specific transcriptional repressor activity,GO:0016811~hydrolase activity, acting on carbon-nitrogen (but not peptide) bonds, in linear amide…	IPR000286:Histone deacetylase superfamily,IPR017320:Histone deacetylase class II, eukaryotic,			PIRSF037911:HDAC_II_euk,PIRSF037911:histone deacetylase class II, eukaryotic type,		3d-structure,chromatin regulator,coiled coil,complete proteome,cytoplasm,hydrolase,isopeptide bond,nucleus,phosphoprotein,polymorphism,repressor,Transcription,transcription regulation,ubl conjugation,	chain:Histone deacetylase 4,cross-link:Glycyl lysine isopeptide (Lys-Gly) (interchain with G-Cter in SUMO),helix,modified residue,mutagenesis site,region of interest:Histone deacetylase,region of interest:Interaction with MEF2A,sequence conflict,sequence variant,short sequence motif:Nuclear export signal,strand,turn,
ENSG00000122592	homeobox A7	Homo sapiens		h_keratinocytePathway:Keratinocyte Differentiation,		GO:0000122~negative regulation of transcription from RNA polymerase II promoter,GO:0001501~skeletal system development,GO:0003002~regionalization,GO:0006350~transcription,GO:0006355~regulation of transcription, DNA-dependent,GO:0006357~regulation of transcription from RNA polymerase II promoter,GO:0007389~pattern specification process,GO:0009792~embryonic development ending in birth or egg hatchi…		GO:0003677~DNA binding,GO:0003700~transcription factor activity,GO:0016564~transcription repressor activity,GO:0030528~transcription regulator activity,GO:0043565~sequence-specific DNA binding,	IPR001356:Homeobox,IPR001827:Homeobox protein, antennapedia type, conserved site,IPR012287:Homeodomain-related,IPR017970:Homeobox, conserved site,IPR017995:Homeobox protein, antennapedia type,			PIRSF002612:homeotic protein Hox A5/D4,PIRSF500606:homeotic protein Hox D4,	SM00389:HOX,	complete proteome,developmental protein,DNA binding,dna-binding,Homeobox,nucleus,polymorphism,Transcription,transcription regulation,	chain:Homeobox protein Hox-A7,compositionally biased region:Asp/Glu-rich (highly acidic),compositionally biased region:Poly-Ala,compositionally biased region:Poly-Arg,compositionally biased region:Poly-Glu,DNA-binding region:Homeobox,sequence conflict,sequence variant,short sequence motif:Antp-type hexapeptide,
ENSG00000145681	hyaluronan and proteoglycan link protein 1	Homo sapiens				GO:0007155~cell adhesion,GO:0022610~biological adhesion,	GO:0005576~extracellular region,GO:0005578~proteinaceous extracellular matrix,GO:0031012~extracellular matrix,GO:0044421~extracellular region part,	GO:0001871~pattern binding,GO:0005539~glycosaminoglycan binding,GO:0005540~hyaluronic acid binding,GO:0030246~carbohydrate binding,GO:0030247~polysaccharide binding,	IPR000538:Link,IPR003596:Immunoglobulin V-set, subgroup,IPR007110:Immunoglobulin-like,IPR013106:Immunoglobulin V-set,IPR013783:Immunoglobulin-like fold,IPR016186:C-type lectin-like,		A genome-wide association study of breast and prostate cancer in the NHLBI's Framingham Heart Study,		SM00406:IGv,SM00445:LINK,	cartilage,complete proteome,disulfide bond,duplication,extracellular matrix,glycoprotein,hyaluronic acid,Immunoglobulin domain,polymorphism,proteoglycan,repeat,Secreted,	chain:Hyaluronan and proteoglycan link protein 1,disulfide bond,domain:Ig-like V-type,domain:Link 1,domain:Link 2,glycosylation site:N-linked (GlcNAc...),sequence conflict,sequence variant,
ENSG00000130956	hyaluronan binding protein 4	Homo sapiens				GO:0006350~transcription,GO:0045449~regulation of transcription,			IPR006861:Hyaluronan/mRNA binding protein,			PIRSF017773:PIRSF017773,		alternative splicing,coiled coil,complete proteome,cytoplasm,nucleus,phosphoprotein,Transcription,transcription regulation,	chain:Intracellular hyaluronan-binding protein 4,modified residue,sequence conflict,splice variant,
ENSG00000169047	insulin receptor substrate 1	Homo sapiens	104.Insulin_signaling,105.Signaling_glucose_uptake,107.mRNA_translation-protein_synthesis,108.Regulating_glucose_transport,158.14-3-3_signal_transduction,	h_eif4Pathway:Regulation of eIF4e and p70 S6 Kinase,h_ghPathway:Growth Hormone Signaling Pathway,h_igf1Pathway:IGF-1 Signaling Pathway,h_igf1rPathway:Multiple antiapoptotic pathways from IGF-1R signaling lead to BAD phosphorylation,h_il2rbPathway:IL-2 Receptor Beta Chain in T cell Activation,h_il4Pathway:IL 4 signaling pathway,h_insulinPathway:Insulin Signaling Pathway,		GO:0002053~positive regulation of mesenchymal cell proliferation,GO:0005979~regulation of glycogen biosynthetic process,GO:0006109~regulation of carbohydrate metabolic process,GO:0006461~protein complex assembly,GO:0007166~cell surface receptor linked signal transduction,GO:0007167~enzyme linked receptor protein signaling pathway,GO:0007169~transmembrane receptor protein tyrosine kinase signaling…	GO:0000267~cell fraction,GO:0005624~membrane fraction,GO:0005626~insoluble fraction,GO:0005792~microsome,GO:0005886~plasma membrane,GO:0005887~integral to plasma membrane,GO:0005899~insulin receptor complex,GO:0005901~caveola,GO:0016021~integral to membrane,GO:0031224~intrinsic to membrane,GO:0031226~intrinsic to plasma membrane,GO:0042598~vesicular fraction,GO:0043235~receptor complex,GO:0044459…	GO:0004672~protein kinase activity,GO:0004713~protein tyrosine kinase activity,GO:0004714~transmembrane receptor protein tyrosine kinase activity,GO:0005080~protein kinase C binding,GO:0005158~insulin receptor binding,GO:0005159~insulin-like growth factor receptor binding,GO:0019899~enzyme binding,GO:0019900~kinase binding,GO:0019901~protein kinase binding,GO:0019904~protein domain specific bindi…	IPR001849:Pleckstrin homology,IPR002404:Insulin receptor substrate-1, PTB,IPR011993:Pleckstrin homology-type,	hsa04722:Neurotrophin signaling pathway,hsa04910:Insulin signaling pathway,hsa04920:Adipocytokine signaling pathway,hsa04930:Type II diabetes mellitus,hsa04960:Aldosterone-regulated sodium reabsorption,	Coronary artery disease, susceptibility to,Diabetes mellitus, noninsulin-dependent,	PIRSF001737:insulin receptor substrate,	SM00233:PH,SM00310:PTBI,	3d-structure,ATP,complete proteome,diabetes mellitus,disease mutation,phosphoprotein,polymorphism,repeat,transducer,	chain:Insulin receptor substrate 1,compositionally biased region:Poly-Gln,compositionally biased region:Poly-Gly,compositionally biased region:Poly-Ser,compositionally biased region:Pro-rich,compositionally biased region:Ser-rich,domain:IRS-type PTB,domain:PH,helix,modified residue,mutagenesis site,region of interest:GRB2-binding,sequence conflict,sequence variant,short sequence motif:YXXM motif …
ENSG00000027697	interferon gamma receptor 1	Homo sapiens		h_ifngPathway:IFN gamma signaling pathway ,h_nktPathway:Selective expression of chemokine receptors during T-cell polarization,h_th1th2Pathway:Th1/Th2 Differentiation,h_tidPathway:Chaperones modulate interferon Signaling Pathway,		GO:0009615~response to virus,	GO:0005783~endoplasmic reticulum,GO:0005856~cytoskeleton,GO:0005886~plasma membrane,GO:0005887~integral to plasma membrane,GO:0014069~postsynaptic density,GO:0016021~integral to membrane,GO:0030425~dendrite,GO:0031224~intrinsic to membrane,GO:0031226~intrinsic to plasma membrane,GO:0031982~vesicle,GO:0042995~cell projection,GO:0043005~neuron projection,GO:0043228~non-membrane-bounded organelle,GO…	GO:0004896~cytokine receptor activity,GO:0004904~interferon receptor activity,GO:0004906~interferon-gamma receptor activity,GO:0019955~cytokine binding,GO:0019961~interferon binding,GO:0019964~interferon-gamma binding,	IPR008355:Interferon gamma receptor alpha subunit,IPR008957:Fibronectin, type III-like fold,	hsa04060:Cytokine-cytokine receptor interaction,hsa04630:Jak-STAT signaling pathway,hsa04650:Natural killer cell mediated cytotoxicity,	BCG infection, generalized familial,H. pylori infection, susceptibility to,Mycobacterial infection, atypical, familial disseminated,Mycobacterium tuberculosis infection, protection against,Tuberculosis, susceptibility to,	PIRSF001953:interferon gamma receptor,		3d-structure,complete proteome,cytokine receptor,direct protein sequencing,disease mutation,disulfide bond,glycoprotein,Immunoglobulin domain,membrane,phosphoprotein,polymorphism,receptor,signal,transmembrane,transmembrane protein,	chain:Interferon-gamma receptor 1,disulfide bond,glycosylation site:N-linked (GlcNAc...),helix,modified residue,sequence variant,signal peptide,strand,topological domain:Cytoplasmic,topological domain:Extracellular,transmembrane region,turn,
ENSG00000102753	karyopherin alpha 3 (importin alpha 4)	Homo sapiens			Intracellular trafficking and secretion,	GO:0006461~protein complex assembly,GO:0006605~protein targeting,GO:0006606~protein import into nucleus,GO:0006607~NLS-bearing substrate import into nucleus,GO:0006886~intracellular protein transport,GO:0006913~nucleocytoplasmic transport,GO:0008104~protein localization,GO:0015031~protein transport,GO:0017038~protein import,GO:0033365~protein localization in organelle,GO:0034504~protein localizat…	GO:0005635~nuclear envelope,GO:0005643~nuclear pore,GO:0012505~endomembrane system,GO:0016021~integral to membrane,GO:0031224~intrinsic to membrane,GO:0031967~organelle envelope,GO:0031975~envelope,GO:0046930~pore complex,	GO:0005048~signal sequence binding,GO:0008022~protein C-terminus binding,GO:0008139~nuclear localization sequence binding,GO:0008565~protein transporter activity,GO:0042277~peptide binding,	IPR000225:Armadillo,IPR002652:Importin-alpha-like, importin-beta-binding region,IPR011989:Armadillo-like helical,			PIRSF005673:pendulin,	SM00185:ARM,	acetylation,complete proteome,cytoplasm,nucleus,phosphoprotein,polymorphism,protein transport,repeat,transport,	chain:Importin subunit alpha-3,domain:IBB,modified residue,region of interest:NLS binding site (major),region of interest:NLS binding site (minor),repeat:ARM 10; atypical,repeat:ARM 1; truncated,repeat:ARM 2,repeat:ARM 3,repeat:ARM 4,repeat:ARM 5,repeat:ARM 6,repeat:ARM 7,repeat:ARM 8,repeat:ARM 9,sequence conflict,sequence variant,short sequence motif:Nuclear localization signal,
ENSG00000205864	keratin associated protein 5-6	Homo sapiens					GO:0005856~cytoskeleton,GO:0005882~intermediate filament,GO:0043228~non-membrane-bounded organelle,GO:0043232~intracellular non-membrane-bounded organelle,GO:0044430~cytoskeletal part,GO:0045095~keratin filament,GO:0045111~intermediate filament cytoskeleton,		IPR002494:Keratin, high sulphur B2 protein,					complete proteome,keratin,polymorphism,repeat,	chain:Keratin-associated protein 5-6,region of interest:6 X 4 AA repeats of C-C-X-P,repeat:1,repeat:2,repeat:3,repeat:4,repeat:5,repeat:6,sequence variant,
ENSG00000050555	laminin, gamma 3	Homo sapiens				GO:0007155~cell adhesion,GO:0022610~biological adhesion,	GO:0005576~extracellular region,GO:0005578~proteinaceous extracellular matrix,GO:0005604~basement membrane,GO:0031012~extracellular matrix,GO:0044420~extracellular matrix part,GO:0044421~extracellular region part,	GO:0005198~structural molecule activity,	IPR000034:Laminin B type IV,IPR002049:EGF-like, laminin,IPR008211:Laminin, N-terminal,IPR013032:EGF-like region, conserved site,	hsa04510:Focal adhesion,hsa04512:ECM-receptor interaction,hsa05200:Pathways in cancer,hsa05222:Small cell lung cancer,		PIRSF002271:laminin beta-1 chain,	SM00136:LamNT,SM00180:EGF_Lam,	basement membrane,cell adhesion,coiled coil,complete proteome,disulfide bond,extracellular matrix,glycoprotein,laminin egf-like domain,polymorphism,repeat,Secreted,signal,	chain:Laminin subunit gamma-3,disulfide bond,domain:Laminin EGF-like 1,domain:Laminin EGF-like 10,domain:Laminin EGF-like 11,domain:Laminin EGF-like 2,domain:Laminin EGF-like 3,domain:Laminin EGF-like 4,domain:Laminin EGF-like 5; first part,domain:Laminin EGF-like 5; second part,domain:Laminin EGF-like 6,domain:Laminin EGF-like 7,domain:Laminin EGF-like 8,domain:Laminin EGF-like 9,domain:Laminin …
ENSG00000131409	leucine rich repeat containing 4B	Homo sapiens					GO:0016021~integral to membrane,GO:0031224~intrinsic to membrane,		IPR000372:Leucine-rich repeat, cysteine-rich flanking region, N-terminal,IPR000483:Cysteine-rich flanking region, C-terminal,IPR001611:Leucine-rich repeat,IPR003591:Leucine-rich repeat, typical subtype,IPR003598:Immunoglobulin subtype 2,IPR007110:Immunoglobulin-like,IPR013098:Immunoglobulin I-set,IPR013783:Immunoglobulin-like fold,				SM00013:LRRNT,SM00082:LRRCT,SM00369:LRR_TYP,SM00408:IGc2,	cell junction,cell membrane,complete proteome,disulfide bond,glycoprotein,Immunoglobulin domain,leucine-rich repeat,membrane,phosphoprotein,repeat,signal,synapse,transmembrane,	chain:Leucine-rich repeat-containing protein 4B,compositionally biased region:Gly-rich,compositionally biased region:Poly-Ala,disulfide bond,domain:Ig-like C2-type,glycosylation site:N-linked (GlcNAc...),modified residue,repeat:LRR 1,repeat:LRR 2,repeat:LRR 3,repeat:LRR 4,repeat:LRR 5,repeat:LRR 6,repeat:LRR 7,repeat:LRR 8,repeat:LRR 9,sequence conflict,signal peptide,topological domain:Cytoplasm…
ENSG00000143194	maelstrom homolog (Drosophila)	Homo sapiens				GO:0000122~negative regulation of transcription from RNA polymerase II promoter,GO:0000279~M phase,GO:0000902~cell morphogenesis,GO:0006259~DNA metabolic process,GO:0006304~DNA modification,GO:0006305~DNA alkylation,GO:0006306~DNA methylation,GO:0006355~regulation of transcription, DNA-dependent,GO:0006357~regulation of transcription from RNA polymerase II promoter,GO:0006730~one-carbon metabolic…	GO:0000228~nuclear chromosome,GO:0000785~chromatin,GO:0000790~nuclear chromatin,GO:0000792~heterochromatin,GO:0000803~sex chromosome,GO:0001739~sex chromatin,GO:0001741~XY body,GO:0005694~chromosome,GO:0005720~nuclear heterochromatin,GO:0016585~chromatin remodeling complex,GO:0030529~ribonucleoprotein complex,GO:0030849~autosome,GO:0033391~chromatoid body,GO:0043186~P granule,GO:0043228~non-membr…	GO:0003677~DNA binding,	IPR015101:Region of unknown function DUF1898,					3d-structure,alternative splicing,complete proteome,cytoplasm,developmental protein,differentiation,dna-binding,meiosis,nucleus,polymorphism,rna-mediated gene silencing,spermatogenesis,	chain:Protein maelstrom homolog,DNA-binding region:HMG box,helix,sequence variant,splice variant,
ENSG00000103150	malonyl-CoA decarboxylase	Homo sapiens				GO:0006084~acetyl-CoA metabolic process,GO:0006085~acetyl-CoA biosynthetic process,GO:0006631~fatty acid metabolic process,GO:0006633~fatty acid biosynthetic process,GO:0006637~acyl-CoA metabolic process,GO:0006732~coenzyme metabolic process,GO:0008610~lipid biosynthetic process,GO:0009108~coenzyme biosynthetic process,GO:0009894~regulation of catabolic process,GO:0010565~regulation of cellular k…	GO:0005739~mitochondrion,GO:0005777~peroxisome,GO:0005829~cytosol,GO:0042579~microbody,	GO:0004492~methylmalonyl-CoA decarboxylase activity,GO:0016831~carboxy-lyase activity,GO:0050080~malonyl-CoA decarboxylase activity,	IPR007956:Malonyl-CoA decarboxylase,	hsa00410:beta-Alanine metabolism,hsa00640:Propanoate metabolism,	Malonyl-CoA decarboxylase deficiency,			alternative initiation,complete proteome,cytoplasm,decarboxylase,Fatty acid biosynthesis,lipid synthesis,lyase,mitochondrion,peroxisome,phosphoprotein,transit peptide,	chain:Malonyl-CoA decarboxylase, mitochondrial,modified residue,sequence conflict,short sequence motif:Microbody targeting signal,splice variant,transit peptide:Mitochondrion,
ENSG00000136146	mediator complex subunit 4	Homo sapiens				GO:0006350~transcription,GO:0006351~transcription, DNA-dependent,GO:0006352~transcription initiation,GO:0006355~regulation of transcription, DNA-dependent,GO:0006357~regulation of transcription from RNA polymerase II promoter,GO:0006366~transcription from RNA polymerase II promoter,GO:0006367~transcription initiation from RNA polymerase II promoter,GO:0006461~protein complex assembly,GO:0007242~i…	GO:0000119~mediator complex,GO:0005654~nucleoplasm,GO:0005730~nucleolus,GO:0016592~Srb-mediator complex,GO:0031974~membrane-enclosed lumen,GO:0031981~nuclear lumen,GO:0043228~non-membrane-bounded organelle,GO:0043232~intracellular non-membrane-bounded organelle,GO:0043233~organelle lumen,GO:0044451~nucleoplasm part,GO:0070013~intracellular organelle lumen,	GO:0003702~RNA polymerase II transcription factor activity,GO:0003712~transcription cofactor activity,GO:0003713~transcription coactivator activity,GO:0008134~transcription factor binding,GO:0016251~general RNA polymerase II transcription factor activity,GO:0016455~RNA polymerase II transcription mediator activity,GO:0016563~transcription activator activity,GO:0030374~ligand-dependent nuclear rec…	IPR019258:Mediator complex, subunit Med4, metazoa,					activator,coiled coil,complete proteome,direct protein sequencing,nucleus,phosphoprotein,Transcription,transcription regulation,	chain:Mediator of RNA polymerase II transcription subunit 4,compositionally biased region:Poly-Ser,modified residue,sequence conflict,
ENSG00000076706	melanoma cell adhesion molecule	Homo sapiens				GO:0007155~cell adhesion,GO:0022610~biological adhesion,	GO:0005886~plasma membrane,GO:0016021~integral to membrane,GO:0031224~intrinsic to membrane,		IPR003598:Immunoglobulin subtype 2,IPR003599:Immunoglobulin subtype,IPR007110:Immunoglobulin-like,IPR013106:Immunoglobulin V-set,IPR013151:Immunoglobulin,IPR013162:CD80-like, immunoglobulin C2-set,IPR013783:Immunoglobulin-like fold,			PIRSF038703:VVC2C2C2 Ig-like domain arrangement-containing protein,	SM00408:IGc2,SM00409:IG,	alternative splicing,cell adhesion,complete proteome,direct protein sequencing,disulfide bond,glycoprotein,Immunoglobulin domain,membrane,phosphoprotein,polymorphism,repeat,signal,transmembrane,transmembrane protein,	chain:Cell surface glycoprotein MUC18,disulfide bond,domain:Ig-like C2-type 1,domain:Ig-like C2-type 2,domain:Ig-like C2-type 3,domain:Ig-like V-type 1,domain:Ig-like V-type 2,glycosylation site:N-linked (GlcNAc...),modified residue,sequence conflict,sequence variant,signal peptide,splice variant,topological domain:Cytoplasmic,topological domain:Extracellular,transmembrane region,
ENSG00000140406	mesoderm development candidate 1	Homo sapiens							IPR015710:Talin related,					acetylation,complete proteome,phosphoprotein,	chain:Mesoderm development candidate 1,modified residue,
ENSG00000134046	methyl-CpG binding domain protein 2	Homo sapiens				GO:0000122~negative regulation of transcription from RNA polymerase II promoter,GO:0006350~transcription,GO:0006355~regulation of transcription, DNA-dependent,GO:0006357~regulation of transcription from RNA polymerase II promoter,GO:0006461~protein complex assembly,GO:0007610~behavior,GO:0009890~negative regulation of biosynthetic process,GO:0009967~positive regulation of signal transduction,GO:0…	GO:0000118~histone deacetylase complex,GO:0000785~chromatin,GO:0000792~heterochromatin,GO:0005654~nucleoplasm,GO:0005694~chromosome,GO:0016585~chromatin remodeling complex,GO:0031974~membrane-enclosed lumen,GO:0031981~nuclear lumen,GO:0043228~non-membrane-bounded organelle,GO:0043232~intracellular non-membrane-bounded organelle,GO:0043233~organelle lumen,GO:0044427~chromosomal part,GO:0044451~nuc…	GO:0000166~nucleotide binding,GO:0003677~DNA binding,GO:0003682~chromatin binding,GO:0003696~satellite DNA binding,GO:0003723~RNA binding,GO:0003729~mRNA binding,GO:0008327~methyl-CpG binding,GO:0016564~transcription repressor activity,GO:0019904~protein domain specific binding,GO:0030528~transcription regulator activity,GO:0035197~siRNA binding,GO:0043565~sequence-specific DNA binding,GO:0070742…	IPR001739:Methyl-CpG DNA binding,				SM00391:MBD,	alternative splicing,complete proteome,dna-binding,nucleus,phosphoprotein,Transcription,transcription regulation,	chain:Methyl-CpG-binding domain protein 2,compositionally biased region:Arg-rich,compositionally biased region:Gly-rich,domain:MBD,modified residue,splice variant,
ENSG00000120333	mitochondrial ribosomal protein S14	Homo sapiens				GO:0006412~translation,	GO:0000313~organellar ribosome,GO:0005739~mitochondrion,GO:0005759~mitochondrial matrix,GO:0005761~mitochondrial ribosome,GO:0005840~ribosome,GO:0030529~ribonucleoprotein complex,GO:0031974~membrane-enclosed lumen,GO:0031980~mitochondrial lumen,GO:0043228~non-membrane-bounded organelle,GO:0043232~intracellular non-membrane-bounded organelle,GO:0043233~organelle lumen,GO:0044429~mitochondrial part…	GO:0003735~structural constituent of ribosome,GO:0005198~structural molecule activity,	IPR001209:Ribosomal protein S14,IPR018271:Ribosomal protein S14, conserved site,					complete proteome,mitochondrion,ribonucleoprotein,ribosomal protein,	chain:28S ribosomal protein S14, mitochondrial,
ENSG00000181610	mitochondrial ribosomal protein S23	Homo sapiens					GO:0005739~mitochondrion,GO:0005840~ribosome,GO:0030529~ribonucleoprotein complex,GO:0043228~non-membrane-bounded organelle,GO:0043232~intracellular non-membrane-bounded organelle,		IPR019520:Ribosomal protein S23, mitochondrial,					acetylation,complete proteome,mitochondrion,ribonucleoprotein,ribosomal protein,	chain:28S ribosomal protein S23, mitochondrial,modified residue,sequence conflict,
ENSG00000102738	mitochondrial ribosomal protein S31	Homo sapiens					GO:0005739~mitochondrion,GO:0005840~ribosome,GO:0030529~ribonucleoprotein complex,GO:0043228~non-membrane-bounded organelle,GO:0043232~intracellular non-membrane-bounded organelle,	GO:0019904~protein domain specific binding,						complete proteome,mitochondrion,polymorphism,ribonucleoprotein,ribosomal protein,transit peptide,	chain:28S ribosomal protein S31, mitochondrial,sequence conflict,sequence variant,transit peptide:Mitochondrion,
ENSG00000116353	mitochondrial trans-2-enoyl-CoA reductase	Homo sapiens			Energy production and conversion / General function prediction only,	GO:0006631~fatty acid metabolic process,GO:0006633~fatty acid biosynthetic process,GO:0008610~lipid biosynthetic process,GO:0016053~organic acid biosynthetic process,GO:0046394~carboxylic acid biosynthetic process,GO:0055114~oxidation reduction,	GO:0005739~mitochondrion,	GO:0008270~zinc ion binding,GO:0016628~oxidoreductase activity, acting on the CH-CH group of donors, NAD or NADP as acceptor,GO:0019166~trans-2-enoyl-CoA reductase (NADPH) activity,GO:0043167~ion binding,GO:0043169~cation binding,GO:0046872~metal ion binding,GO:0046914~transition metal ion binding,	IPR002085:Alcohol dehydrogenase superfamily, zinc-containing,IPR013149:Alcohol dehydrogenase, zinc-binding,IPR013154:Alcohol dehydrogenase GroES-like,IPR016040:NAD(P)-binding domain,	hsa00062:Fatty acid elongation in mitochondria,		PIRSF000091:alcohol dehydrogenase,		3d-structure,complete proteome,Fatty acid biosynthesis,lipid synthesis,mitochondrion,nadp,oxidoreductase,polymorphism,transit peptide,	chain:Trans-2-enoyl-CoA reductase, mitochondrial,helix,sequence conflict,sequence variant,strand,transit peptide:Mitochondrion,
ENSG00000135341	mitogen-activated protein kinase kinase kinase 7	Homo sapiens		h_alkPathway:ALK in cardiac myocytes,h_fasPathway:FAS signaling pathway ( CD95 ),h_il1rPathway:Signal transduction through IL1R,h_mapkPathway:MAPKinase Signaling Pathway,h_nfkbPathway:NF-kB Signaling Pathway,h_nthiPathway:NFkB activation by Nontypeable Hemophilus influenzae,h_p38mapkPathway:p38 MAPK Signaling Pathway ,h_Par1Pathway:Thrombin signaling and protease-activated receptors,h_tgfbPathway…		GO:0000165~MAPKKK cascade,GO:0001525~angiogenesis,GO:0001568~blood vessel development,GO:0001817~regulation of cytokine production,GO:0001819~positive regulation of cytokine production,GO:0001838~embryonic epithelial tube formation,GO:0001841~neural tube formation,GO:0001944~vasculature development,GO:0002009~morphogenesis of an epithelium,GO:0002253~activation of immune response,GO:0002429~immun…	GO:0005829~cytosol,	GO:0000166~nucleotide binding,GO:0000287~magnesium ion binding,GO:0001882~nucleoside binding,GO:0001883~purine nucleoside binding,GO:0004672~protein kinase activity,GO:0004674~protein serine/threonine kinase activity,GO:0004708~MAP kinase kinase activity,GO:0004709~MAP kinase kinase kinase activity,GO:0004712~protein serine/threonine/tyrosine kinase activity,GO:0004713~protein tyrosine kinase act…	IPR000719:Protein kinase, core,IPR001245:Tyrosine protein kinase,IPR008271:Serine/threonine protein kinase, active site,IPR015786:Mitogen activated protein kinase kinase kinase-related,IPR017421:Mitogen-activated protein kinase kinase kinase 7,IPR017441:Protein kinase, ATP binding site,IPR017442:Serine/threonine protein kinase-related,	hsa04010:MAPK signaling pathway,hsa04310:Wnt signaling pathway,hsa04520:Adherens junction,hsa04620:Toll-like receptor signaling pathway,hsa04621:NOD-like receptor signaling pathway,hsa04622:RIG-I-like receptor signaling pathway,hsa04660:T cell receptor signaling pathway,		PIRSF038168:MAPKKK7,PIRSF038168:mitogen-activated protein kinase kinase kinase 7,	SM00219:TyrKc,	3d-structure,alternative splicing,atp-binding,complete proteome,kinase,magnesium,metal-binding,nucleotide-binding,phosphoprotein,phosphotransferase,serine/threonine-protein kinase,transferase,	active site:Proton acceptor,binding site:ATP,chain:Mitogen-activated protein kinase kinase kinase 7,compositionally biased region:Poly-Ser,domain:Protein kinase,helix,modified residue,mutagenesis site,nucleotide phosphate-binding region:ATP,splice variant,strand,turn,
ENSG00000107968	mitogen-activated protein kinase kinase kinase 8	Homo sapiens		h_mapkPathway:MAPKinase Signaling Pathway,		GO:0006468~protein amino acid phosphorylation,GO:0006793~phosphorus metabolic process,GO:0006796~phosphate metabolic process,GO:0007049~cell cycle,GO:0016310~phosphorylation,	GO:0005829~cytosol,	GO:0000166~nucleotide binding,GO:0000287~magnesium ion binding,GO:0001882~nucleoside binding,GO:0001883~purine nucleoside binding,GO:0004672~protein kinase activity,GO:0004674~protein serine/threonine kinase activity,GO:0004709~MAP kinase kinase kinase activity,GO:0005524~ATP binding,GO:0017076~purine nucleotide binding,GO:0030554~adenyl nucleotide binding,GO:0032553~ribonucleotide binding,GO:003…	IPR000719:Protein kinase, core,IPR008271:Serine/threonine protein kinase, active site,IPR017424:Mitogen-activated protein kinase kinase kinase 8,IPR017441:Protein kinase, ATP binding site,IPR017442:Serine/threonine protein kinase-related,	hsa04010:MAPK signaling pathway,hsa04620:Toll-like receptor signaling pathway,hsa04660:T cell receptor signaling pathway,	Lung cancer, somatic,	PIRSF038171:MAPKKK8,PIRSF038171:mitogen-activated protein kinase kinase kinase 8,		alternative initiation,alternative initiators,atp-binding,complete proteome,cytoplasm,kinase,magnesium,metal-binding,nucleotide-binding,phosphoprotein,polymorphism,Proto-oncogene,serine/threonine-protein kinase,transferase,	active site:Proton acceptor,binding site:ATP,chain:Mitogen-activated protein kinase kinase kinase 8,domain:Protein kinase,modified residue,nucleotide phosphate-binding region:ATP,sequence conflict,sequence variant,splice variant,
ENSG00000111245	myosin, light chain 2, regulatory, cardiac, slow	Homo sapiens		h_alkPathway:ALK in cardiac myocytes,h_CCR3Pathway:CCR3 signaling in Eosinophils,h_ecmPathway:Erk and PI-3 Kinase Are Necessary for Collagen Binding in Corneal Epithelia,h_mCalpainPathway:mCalpain and friends in Cell motility,h_myosinPathway:PKC-catalyzed phosphorylation of inhibitory phosphoprotein of myosin phosphatase,h_rac1Pathway:Rac 1 cell motility signaling pathway,h_rhoPathway:Rho cell mo…	Signal transduction mechanisms / Cytoskeleton / Cell division and chromosome partitioning / General function prediction only,	GO:0001558~regulation of cell growth,GO:0003007~heart morphogenesis,GO:0003013~circulatory system process,GO:0003015~heart process,GO:0006937~regulation of muscle contraction,GO:0006942~regulation of striated muscle contraction,GO:0007010~cytoskeleton organization,GO:0007507~heart development,GO:0007517~muscle organ development,GO:0008015~blood circulation,GO:0008361~regulation of cell size,GO:00…	GO:0005856~cytoskeleton,GO:0015629~actin cytoskeleton,GO:0016459~myosin complex,GO:0030016~myofibril,GO:0030017~sarcomere,GO:0043228~non-membrane-bounded organelle,GO:0043232~intracellular non-membrane-bounded organelle,GO:0043292~contractile fiber,GO:0044430~cytoskeletal part,GO:0044449~contractile fiber part,	GO:0003774~motor activity,GO:0003779~actin binding,GO:0003785~actin monomer binding,GO:0005198~structural molecule activity,GO:0005509~calcium ion binding,GO:0008092~cytoskeletal protein binding,GO:0008307~structural constituent of muscle,GO:0017022~myosin binding,GO:0032036~myosin heavy chain binding,GO:0043167~ion binding,GO:0043169~cation binding,GO:0046872~metal ion binding,	IPR002048:Calcium-binding EF-hand,IPR011992:EF-Hand type,IPR018247:EF-HAND 1,IPR018248:EF hand,IPR018249:EF-HAND 2,	hsa04260:Cardiac muscle contraction,hsa04510:Focal adhesion,hsa04530:Tight junction,hsa04670:Leukocyte transendothelial migration,hsa04810:Regulation of actin cytoskeleton,hsa05410:Hypertrophic cardiomyopathy (HCM),hsa05414:Dilated cardiomyopathy,	Cardiomyopathy, familial hypertrophic, 10,Cardiomyopathy, hypertrophic, mid-left ventricular chamber type,	PIRSF002350:calmodulin,	SM00054:EFh,	calcium,calcium binding,cardiac muscle,Cardiomyopathy,complete proteome,direct protein sequencing,disease mutation,duplication,EF hand,heart,methylation,motor protein,muscle contraction,muscle protein,myosin,phosphoprotein,polymorphism,repeat,	chain:Myosin regulatory light chain 2, ventricular/cardiac muscle isoform,domain:EF-hand 1,domain:EF-hand 2,domain:EF-hand 3,modified residue,sequence variant,
ENSG00000139505	myotubularin related protein 6	Homo sapiens				GO:0006470~protein amino acid dephosphorylation,GO:0006793~phosphorus metabolic process,GO:0006796~phosphate metabolic process,GO:0016311~dephosphorylation,	GO:0005635~nuclear envelope,GO:0012505~endomembrane system,GO:0031967~organelle envelope,GO:0031975~envelope,	GO:0004721~phosphoprotein phosphatase activity,GO:0004722~protein serine/threonine phosphatase activity,GO:0004725~protein tyrosine phosphatase activity,GO:0005216~ion channel activity,GO:0005227~calcium activated cation channel activity,GO:0005261~cation channel activity,GO:0005267~potassium channel activity,GO:0015267~channel activity,GO:0015269~calcium-activated potassium channel activity,GO:0…	IPR010569:Myotubularin-related,IPR016130:Protein-tyrosine phosphatase, active site,IPR017906:Myotubularin phosphatase,	hsa00051:Fructose and mannose metabolism,hsa00730:Thiamine metabolism,hsa00740:Riboflavin metabolism,				alternative splicing,complete proteome,hydrolase,nucleus,phosphoprotein,polymorphism,	active site:Phosphocysteine intermediate,binding site:Substrate,chain:Myotubularin-related protein 6,domain:Myotubularin phosphatase,modified residue,region of interest:Substrate binding,sequence conflict,sequence variant,splice variant,
ENSG00000171532	neurogenic differentiation 2	Homo sapiens				GO:0001662~behavioral fear response,GO:0002209~behavioral defense response,GO:0006350~transcription,GO:0006355~regulation of transcription, DNA-dependent,GO:0006357~regulation of transcription from RNA polymerase II promoter,GO:0006952~defense response,GO:0007610~behavior,GO:0007611~learning or memory,GO:0007612~learning,GO:0008306~associative learning,GO:0030182~neuron differentiation,GO:0033555…		GO:0003677~DNA binding,GO:0003700~transcription factor activity,GO:0030528~transcription regulator activity,	IPR001092:Basic helix-loop-helix dimerisation region bHLH,IPR011598:Helix-loop-helix DNA-binding,IPR016637:Transcription factor, basic helix-loop-helix, NeuroD,			PIRSF015618:basic helix-loop-helix transcription factor NeuroD,PIRSF015618:bHLH_NeuroD,	SM00353:HLH,	complete proteome,developmental protein,differentiation,dna-binding,neurogenesis,nucleus,Transcription,transcription regulation,	chain:Neurogenic differentiation factor 2,compositionally biased region:Poly-Glu,compositionally biased region:Poly-Gly,compositionally biased region:Poly-Pro,DNA-binding region:Basic motif,domain:Helix-loop-helix motif,sequence conflict,short sequence motif:Nuclear localization signal,
ENSG00000088970	non-protein coding RNA 153	Homo sapiens				GO:0000226~microtubule cytoskeleton organization,GO:0007010~cytoskeleton organization,GO:0007017~microtubule-based process,GO:0007049~cell cycle,GO:0022402~cell cycle process,GO:0031023~microtubule organizing center organization,GO:0051300~spindle pole body organization,	GO:0005813~centrosome,GO:0005815~microtubule organizing center,GO:0005856~cytoskeleton,GO:0015630~microtubule cytoskeleton,GO:0043228~non-membrane-bounded organelle,GO:0043232~intracellular non-membrane-bounded organelle,GO:0044430~cytoskeletal part,	GO:0019899~enzyme binding,GO:0019900~kinase binding,GO:0019901~protein kinase binding,						alternative splicing,complete proteome,cytoplasm,cytoskeleton,phosphoprotein,polymorphism,	chain:Centrosomal protein kizuna,modified residue,mutagenesis site,sequence conflict,sequence variant,splice variant,
ENSG00000125450	nucleoporin 85kDa	Homo sapiens				GO:0006403~RNA localization,GO:0006928~cell motion,GO:0006935~chemotaxis,GO:0007610~behavior,GO:0007626~locomotory behavior,GO:0008104~protein localization,GO:0015031~protein transport,GO:0015931~nucleobase, nucleoside, nucleotide and nucleic acid transport,GO:0016477~cell migration,GO:0030030~cell projection organization,GO:0030031~cell projection assembly,GO:0030032~lamellipodium assembly,GO:00…	GO:0000775~chromosome, centromeric region,GO:0000776~kinetochore,GO:0000777~condensed chromosome kinetochore,GO:0000779~condensed chromosome, centromeric region,GO:0000793~condensed chromosome,GO:0005635~nuclear envelope,GO:0005643~nuclear pore,GO:0005694~chromosome,GO:0005819~spindle,GO:0005856~cytoskeleton,GO:0012505~endomembrane system,GO:0015630~microtubule cytoskeleton,GO:0016021~integral to…		IPR011502:Nucleoporin, Nup85-like,					acetylation,complete proteome,cytoplasm,cytoskeleton,kinetochore,membrane,mRNA transport,nuclear pore complex,nucleus,phosphoprotein,protein transport,translocation,transport,	chain:Nuclear pore complex protein Nup85,modified residue,sequence conflict,
ENSG00000166579	nudE nuclear distribution gene E homolog (A. nidulans)-like 1	Homo sapiens		h_Lis1Pathway:Lissencephaly gene (LIS1) in neuronal migration and development,		GO:0000226~microtubule cytoskeleton organization,GO:0000902~cell morphogenesis,GO:0000904~cell morphogenesis involved in differentiation,GO:0001701~in utero embryonic development,GO:0001764~neuron migration,GO:0001824~blastocyst development,GO:0001832~blastocyst growth,GO:0001833~inner cell mass cell proliferation,GO:0006928~cell motion,GO:0006997~nucleus organization,GO:0006998~nuclear envelope …	GO:0000775~chromosome, centromeric region,GO:0000776~kinetochore,GO:0000777~condensed chromosome kinetochore,GO:0000779~condensed chromosome, centromeric region,GO:0000793~condensed chromosome,GO:0005635~nuclear envelope,GO:0005694~chromosome,GO:0005813~centrosome,GO:0005815~microtubule organizing center,GO:0005819~spindle,GO:0005856~cytoskeleton,GO:0005874~microtubule,GO:0005875~microtubule asso…	GO:0008017~microtubule binding,GO:0008092~cytoskeletal protein binding,GO:0008233~peptidase activity,GO:0015631~tubulin binding,GO:0043014~alpha-tubulin binding,GO:0048487~beta-tubulin binding,GO:0070012~oligopeptidase activity,	IPR006964:NUDE protein, C-terminal,					3d-structure,alternative splicing,coiled coil,complete proteome,cytoplasm,cytoskeleton,developmental protein,differentiation,kinetochore,microtubule,neurogenesis,phosphoprotein,transport,	chain:Nuclear distribution protein nudE-like 1,helix,modified residue,mutagenesis site,region of interest:Interaction with CENPF,region of interest:Interaction with DISC1,region of interest:Interaction with KATNA1,region of interest:Interaction with KATNB1,region of interest:Interaction with NEFL,region of interest:Interaction with YWHAE,region of interest:Required for interaction with PAFAH1B1,r…
ENSG00000183828	nudix (nucleoside diphosphate linked moiety X)-type motif 14	Homo sapiens						GO:0000287~magnesium ion binding,GO:0008768~UDP-sugar diphosphatase activity,GO:0043167~ion binding,GO:0043169~cation binding,GO:0046872~metal ion binding,	IPR000086:NUDIX hydrolase domain,IPR000086:NUDIX hydrolase, core,IPR004385:Nucleoside diphosphate pyrophosphatase,					complete proteome,cytoplasm,hydrolase,magnesium,	chain:Uridine diphosphate glucose pyrophosphatase,domain:Nudix hydrolase,short sequence motif:Nudix box,
ENSG00000188937	nyctalopin	Homo sapiens				GO:0007600~sensory perception,GO:0007601~visual perception,GO:0050877~neurological system process,GO:0050890~cognition,GO:0050953~sensory perception of light stimulus,	GO:0005576~extracellular region,GO:0005578~proteinaceous extracellular matrix,GO:0031012~extracellular matrix,GO:0044421~extracellular region part,		IPR000372:Leucine-rich repeat, cysteine-rich flanking region, N-terminal,IPR000483:Cysteine-rich flanking region, C-terminal,IPR001611:Leucine-rich repeat,IPR003591:Leucine-rich repeat, typical subtype,		Night blindness, congenital stationary, type 1,Night blindness, congenital stationary, type 1 (CSNB, complete),		SM00013:LRRNT,SM00082:LRRCT,SM00369:LRR_TYP,	complete proteome,Congenital stationary night blindness,disease mutation,extracellular matrix,glycoprotein,leucine-rich repeat,polymorphism,proteoglycan,repeat,Secreted,sensory transduction,signal,vision,	chain:Nyctalopin,compositionally biased region:Cys-rich,glycosylation site:N-linked (GlcNAc...),repeat:LRR 1,repeat:LRR 10,repeat:LRR 11,repeat:LRR 2,repeat:LRR 3,repeat:LRR 4,repeat:LRR 5,repeat:LRR 6,repeat:LRR 7,repeat:LRR 8,repeat:LRR 9,sequence variant,signal peptide,
ENSG00000121390	paraspeckle component 1; paraspeckle protein 1 pseudogene	Homo sapiens				GO:0006350~transcription,GO:0045449~regulation of transcription,	GO:0005654~nucleoplasm,GO:0005730~nucleolus,GO:0016363~nuclear matrix,GO:0016604~nuclear body,GO:0031974~membrane-enclosed lumen,GO:0031981~nuclear lumen,GO:0034399~nuclear periphery,GO:0042382~paraspeckles,GO:0043228~non-membrane-bounded organelle,GO:0043232~intracellular non-membrane-bounded organelle,GO:0043233~organelle lumen,GO:0044451~nucleoplasm part,GO:0070013~intracellular organelle lume…	GO:0000166~nucleotide binding,GO:0003723~RNA binding,	IPR000504:RNA recognition motif, RNP-1,IPR012677:Nucleotide-binding, alpha-beta plait,IPR012975:NOPS,				SM00360:RRM,	acetylation,activator,alternative splicing,coiled coil,complete proteome,cytoplasm,direct protein sequencing,nucleus,phosphoprotein,repeat,rna-binding,Transcription,transcription regulation,	chain:Paraspeckle component 1,compositionally biased region:Gly-rich,domain:RRM 1,domain:RRM 2,modified residue,mutagenesis site,region of interest:Sufficient for paraspeckles localization,region of interest:Sufficient for perinucleolar caps localization and interaction with NONO,splice variant,
ENSG00000100731	pecanex homolog (Drosophila)	Homo sapiens					GO:0016021~integral to membrane,GO:0031224~intrinsic to membrane,		IPR007735:Pecanex,					alternative splicing,complete proteome,glycoprotein,membrane,polymorphism,transmembrane,	chain:Pecanex-like protein 1,compositionally biased region:Poly-His,compositionally biased region:Ser-rich,glycosylation site:N-linked (GlcNAc...),sequence conflict,sequence variant,splice variant,transmembrane region,
ENSG00000108733	peroxisomal biogenesis factor 12	Homo sapiens				GO:0006605~protein targeting,GO:0006625~protein targeting to peroxisome,GO:0006886~intracellular protein transport,GO:0007031~peroxisome organization,GO:0008104~protein localization,GO:0015031~protein transport,GO:0016558~protein import into peroxisome matrix,GO:0017038~protein import,GO:0034613~cellular protein localization,GO:0043574~peroxisomal transport,GO:0045184~establishment of protein loc…	GO:0005777~peroxisome,GO:0005778~peroxisomal membrane,GO:0005779~integral to peroxisomal membrane,GO:0016021~integral to membrane,GO:0031090~organelle membrane,GO:0031224~intrinsic to membrane,GO:0031231~intrinsic to peroxisomal membrane,GO:0031300~intrinsic to organelle membrane,GO:0031301~integral to organelle membrane,GO:0031903~microbody membrane,GO:0042579~microbody,GO:0044438~microbody part…	GO:0008022~protein C-terminus binding,GO:0008270~zinc ion binding,GO:0043167~ion binding,GO:0043169~cation binding,GO:0046872~metal ion binding,GO:0046914~transition metal ion binding,	IPR001841:Zinc finger, RING-type,IPR006845:Pex, N-terminal,IPR017375:Peroxisome assembly, p12,IPR017907:Zinc finger, RING-type, conserved site,		Peroxisome biogenesis factor 12,	PIRSF038074:peroxisome assembly protein 12,PIRSF038074:Peroxisome_assembly_p12,	SM00184:RING,	complete proteome,disease mutation,membrane,metal-binding,peroxisome,peroxisome biogenesis disorder,polymorphism,transmembrane,zellweger syndrome,zinc,zinc-finger,	chain:Peroxisome assembly protein 12,compositionally biased region:Poly-Pro,mutagenesis site,sequence variant,topological domain:Cytoplasmic,topological domain:Peroxisomal matrix,transmembrane region,zinc finger region:RING-type; degenerate,
ENSG00000116120	phenylalanyl-tRNA synthetase, beta subunit	Homo sapiens				GO:0006399~tRNA metabolic process,GO:0006412~translation,GO:0006418~tRNA aminoacylation for protein translation,GO:0006432~phenylalanyl-tRNA aminoacylation,GO:0034660~ncRNA metabolic process,GO:0043038~amino acid activation,GO:0043039~tRNA aminoacylation,	GO:0000267~cell fraction,GO:0005625~soluble fraction,GO:0005829~cytosol,	GO:0000166~nucleotide binding,GO:0000287~magnesium ion binding,GO:0001882~nucleoside binding,GO:0001883~purine nucleoside binding,GO:0003723~RNA binding,GO:0004812~aminoacyl-tRNA ligase activity,GO:0004826~phenylalanine-tRNA ligase activity,GO:0005524~ATP binding,GO:0016875~ligase activity, forming carbon-oxygen bonds,GO:0016876~ligase activity, forming aminoacyl-tRNA and related compounds,GO:001…	IPR004531:Phenylalanyl-tRNA synthetase, class IIc, beta subunit, archae/euk cytosolic,IPR005146:B3/B4 tRNA-binding domain,IPR005147:tRNA synthetase, B5,	hsa00970:Aminoacyl-tRNA biosynthesis,		PIRSF001546:cytosolic phenylalanine-tRNA ligase alpha chain,		acetylation,Aminoacyl-tRNA synthetase,atp-binding,complete proteome,cytoplasm,ligase,nucleotide-binding,phosphoprotein,protein biosynthesis,	chain:Phenylalanyl-tRNA synthetase beta chain,modified residue,sequence conflict,
ENSG00000087157	phosphatidylglycerophosphate synthase 1	Homo sapiens			Lipid metabolism,	GO:0006644~phospholipid metabolic process,GO:0008610~lipid biosynthetic process,GO:0008654~phospholipid biosynthetic process,GO:0019637~organophosphate metabolic process,	GO:0005739~mitochondrion,GO:0005783~endoplasmic reticulum,	GO:0000166~nucleotide binding,GO:0001882~nucleoside binding,GO:0001883~purine nucleoside binding,GO:0005524~ATP binding,GO:0008444~CDP-diacylglycerol-glycerol-3-phosphate 3-phosphatidyltransferase activity,GO:0016780~phosphotransferase activity, for other substituted phosphate groups,GO:0017076~purine nucleotide binding,GO:0017169~CDP-alcohol phosphatidyltransferase activity,GO:0030554~adenyl nuc…	IPR001736:Phospholipase D/Transphosphatidylase,IPR016270:Phospholipase D, phosphatidylserine synthase type,	hsa00564:Glycerophospholipid metabolism,		PIRSF000850:phospholipase D, PSS type,PIRSF000850:Phospholipase_D_PSS,	SM00155:PLDc,	alternative splicing,atp-binding,complete proteome,mitochondrion,nucleotide-binding,phospholipid biosynthesis,repeat,transferase,transit peptide,	chain:CDP-diacylglycerol--glycerol-3-phosphate 3-phosphatidyltransferase, mitochondrial,domain:PLD phosphodiesterase 1,domain:PLD phosphodiesterase 2,nucleotide phosphate-binding region:ATP,splice variant,transit peptide:Mitochondrion,
ENSG00000128655	phosphodiesterase 11A	Homo sapiens					GO:0005829~cytosol,	GO:0004112~cyclic-nucleotide phosphodiesterase activity,GO:0004114~3',5'-cyclic-nucleotide phosphodiesterase activity,GO:0008081~phosphoric diester hydrolase activity,GO:0043167~ion binding,GO:0043169~cation binding,GO:0046872~metal ion binding,GO:0047555~3',5'-cyclic-GMP phosphodiesterase activity,	IPR002073:3'5'-cyclic nucleotide phosphodiesterase,IPR003018:GAF,IPR003607:Metal-dependent phosphohydrolase, HD region,	hsa00230:Purine metabolism,	Pigmented nodular adrenocortical disease, primary, 2,		SM00065:GAF,SM00471:HDc,	allosteric enzyme,alternative splicing,camp,cGMP,complete proteome,cytoplasm,hydrolase,metal-binding,phosphoprotein,polymorphism,repeat,	active site:Proton donor,binding site:cAMP or cGMP,chain:Dual 3',5'-cyclic-AMP and -GMP phosphodiesterase 11A,domain:GAF 1,domain:GAF 2,metal ion-binding site:Divalent metal cation 1,metal ion-binding site:Divalent metal cation 2,modified residue,mutagenesis site,region of interest:Catalytic,sequence variant,splice variant,
ENSG00000186642	phosphodiesterase 2A, cGMP-stimulated	Homo sapiens		h_no1Pathway:Actions of Nitric Oxide in the Heart,			GO:0019898~extrinsic to membrane,	GO:0004112~cyclic-nucleotide phosphodiesterase activity,GO:0004114~3',5'-cyclic-nucleotide phosphodiesterase activity,GO:0004118~cGMP-stimulated cyclic-nucleotide phosphodiesterase activity,GO:0008081~phosphoric diester hydrolase activity,	IPR002073:3'5'-cyclic nucleotide phosphodiesterase,IPR003018:GAF,IPR003607:Metal-dependent phosphohydrolase, HD region,	hsa00230:Purine metabolism,			SM00065:GAF,SM00471:HDc,	3d-structure,alternative splicing,camp,cGMP,cGMP-binding,complete proteome,hydrolase,membrane,metal-binding,nucleotide-binding,phosphoprotein,polymorphism,repeat,	active site:Proton donor,binding site:Allosteric activator cGMP,binding site:Substrate,chain:cGMP-dependent 3',5'-cyclic phosphodiesterase,domain:GAF 1,domain:GAF 2,helix,metal ion-binding site:Divalent metal cation 1,metal ion-binding site:Divalent metal cation 2,modified residue,region of interest:Catalytic,region of interest:Substrate binding,sequence variant,strand,turn,
ENSG00000197943	phospholipase C, gamma 2 (phosphatidylinositol-specific)	Homo sapiens	82.TCR_and_Cap_or_SMAC,			GO:0001775~cell activation,GO:0002237~response to molecule of bacterial origin,GO:0002253~activation of immune response,GO:0002263~cell activation during immune response,GO:0002285~lymphocyte activation during immune response,GO:0002312~B cell activation during immune response,GO:0002313~mature B cell differentiation during immune response,GO:0002316~follicular B cell differentiation,GO:0002335~m…	GO:0000267~cell fraction,GO:0005624~membrane fraction,GO:0005626~insoluble fraction,GO:0005886~plasma membrane,	GO:0004435~phosphoinositide phospholipase C activity,GO:0004620~phospholipase activity,GO:0004629~phospholipase C activity,GO:0005509~calcium ion binding,GO:0008081~phosphoric diester hydrolase activity,GO:0016298~lipase activity,GO:0043167~ion binding,GO:0043169~cation binding,GO:0046872~metal ion binding,	IPR000008:C2 calcium-dependent membrane targeting,IPR000909:Phospholipase C, phosphatidylinositol-specific , X region,IPR000980:SH2 motif,IPR001192:Phospholipase C, phosphoinositol-specific, C-terminal (PLC),IPR001452:Src homology-3 domain,IPR001711:Phospholipase C, phosphatidylinositol-specific, Y domain,IPR001849:Pleckstrin homology,IPR011993:Pleckstrin homology-type,IPR016279:Phosphatidylinosi…	hsa00562:Inositol phosphate metabolism,hsa04012:ErbB signaling pathway,hsa04020:Calcium signaling pathway,hsa04070:Phosphatidylinositol signaling system,hsa04370:VEGF signaling pathway,hsa04650:Natural killer cell mediated cytotoxicity,hsa04662:B cell receptor signaling pathway,hsa04664:Fc epsilon RI signaling pathway,hsa04666:Fc gamma R-mediated phagocytosis,hsa04670:Leukocyte transendothelial m…		PIRSF000952:1-phosphatidylinositol-4,5-bisphosphate phosphodiesterase gamma,PIRSF000952:PLC-gamma,	SM00148:PLCXc,SM00149:PLCYc,SM00233:PH,SM00239:C2,SM00252:SH2,SM00326:SH3,	3d-structure,calcium,complete proteome,hydrolase,lipid degradation,phosphoprotein,phosphoric diester hydrolase,polymorphism,repeat,SH2 domain,sh3 domain,transducer,	chain:1-phosphatidylinositol-4,5-bisphosphate phosphodiesterase gamma-2,domain:C2,domain:PH,domain:PI-PLC X-box,domain:PI-PLC Y-box,domain:SH2 1,domain:SH2 2,domain:SH3,helix,modified residue,sequence conflict,sequence variant,strand,turn,
ENSG00000115896	phospholipase C-like 1	Homo sapiens				GO:0007242~intracellular signaling cascade,GO:0007610~behavior,		GO:0004435~phosphoinositide phospholipase C activity,GO:0004620~phospholipase activity,GO:0004629~phospholipase C activity,GO:0005509~calcium ion binding,GO:0008081~phosphoric diester hydrolase activity,GO:0016298~lipase activity,GO:0043167~ion binding,GO:0043169~cation binding,GO:0046872~metal ion binding,	IPR000008:C2 calcium-dependent membrane targeting,IPR000909:Phospholipase C, phosphatidylinositol-specific , X region,IPR001192:Phospholipase C, phosphoinositol-specific, C-terminal (PLC),IPR001711:Phospholipase C, phosphatidylinositol-specific, Y domain,IPR001849:Pleckstrin homology,IPR011992:EF-Hand type,IPR011993:Pleckstrin homology-type,IPR015359:Phospholipase C, phosphoinositol-specific, EF-…		Identification of PLCL1 gene for hip bone size variation in females in a genome-wide association study,Susceptibility loci for intracranial aneurysm in European and Japanese populations,	PIRSF000949:inactive phospholipase C-like proteins 1/2,	SM00148:PLCXc,SM00149:PLCYc,SM00233:PH,SM00239:C2,	alternative splicing,coiled coil,complete proteome,cytoplasm,phosphoprotein,phosphoric diester hydrolase,polymorphism,transducer,	chain:Inactive phospholipase C-like protein 1,domain:C2,domain:PH,domain:PI-PLC X-box,domain:PI-PLC Y-box,modified residue,region of interest:Interaction with GABA A beta subunit,region of interest:Interaction with PPP1C,sequence conflict,sequence variant,splice variant,
ENSG00000068137	pleckstrin homology domain containing, family H (with MyTH4 domain) member 3	Homo sapiens					GO:0005856~cytoskeleton,GO:0043228~non-membrane-bounded organelle,GO:0043232~intracellular non-membrane-bounded organelle,		IPR000299:FERM domain,IPR000857:Unconventional myosin/plant kinesin-like protein/non-motor protein conserved region MyTH4,IPR001849:Pleckstrin homology,IPR011993:Pleckstrin homology-type,IPR019747:FERM conserved site,IPR019748:FERM central domain,IPR019749:Band 4.1 domain,				SM00139:MyTH4,SM00233:PH,SM00295:B41,	alternative splicing,complete proteome,phosphoprotein,polymorphism,signal,	chain:Pleckstrin homology domain-containing family H member 3,compositionally biased region:Poly-Ser,domain:FERM,domain:MyTH4,domain:PH,modified residue,sequence conflict,sequence variant,signal peptide,splice variant,
ENSG00000156374	polycomb group ring finger 6	Homo sapiens				GO:0006350~transcription,GO:0009890~negative regulation of biosynthetic process,GO:0010558~negative regulation of macromolecule biosynthetic process,GO:0010605~negative regulation of macromolecule metabolic process,GO:0010629~negative regulation of gene expression,GO:0016481~negative regulation of transcription,GO:0031327~negative regulation of cellular biosynthetic process,GO:0045449~regulation …	GO:0031519~PcG protein complex,	GO:0003677~DNA binding,GO:0003700~transcription factor activity,GO:0008270~zinc ion binding,GO:0030528~transcription regulator activity,GO:0043167~ion binding,GO:0043169~cation binding,GO:0046872~metal ion binding,GO:0046914~transition metal ion binding,	IPR001841:Zinc finger, RING-type,IPR017907:Zinc finger, RING-type, conserved site,IPR018957:Zinc finger, C3HC4 RING-type,				SM00184:RING,	3d-structure,alternative splicing,coiled coil,complete proteome,metal-binding,nucleus,phosphoprotein,polymorphism,repressor,Transcription,transcription regulation,zinc,zinc-finger,	chain:Polycomb group RING finger protein 6,compositionally biased region:Glu-rich,compositionally biased region:Pro-rich,helix,modified residue,mutagenesis site,sequence conflict,sequence variant,splice variant,strand,turn,zinc finger region:RING-type,
ENSG00000173889	polyhomeotic homolog 3 (Drosophila)	Homo sapiens						GO:0003677~DNA binding,GO:0008270~zinc ion binding,GO:0043167~ion binding,GO:0043169~cation binding,GO:0046872~metal ion binding,GO:0046914~transition metal ion binding,	IPR001660:Sterile alpha motif SAM,IPR012313:Zinc finger, FCS-type,IPR013761:Sterile alpha motif-type,				SM00454:SAM,	alternative splicing,complete proteome,developmental protein,dna-binding,metal-binding,nucleus,phosphoprotein,zinc,zinc-finger,	chain:Polyhomeotic-like protein 3,compositionally biased region:Gln-rich,compositionally biased region:Poly-Thr,compositionally biased region:Pro-rich,compositionally biased region:Ser-rich,domain:SAM,modified residue,sequence conflict,short sequence motif:HD1,splice variant,zinc finger region:FCS-type,
ENSG00000137054	polymerase (RNA) I polypeptide E, 53kDa	Homo sapiens				GO:0006350~transcription,GO:0006351~transcription, DNA-dependent,GO:0009303~rRNA transcription,GO:0032774~RNA biosynthetic process,	GO:0005730~nucleolus,GO:0031974~membrane-enclosed lumen,GO:0031981~nuclear lumen,GO:0043228~non-membrane-bounded organelle,GO:0043232~intracellular non-membrane-bounded organelle,GO:0043233~organelle lumen,GO:0070013~intracellular organelle lumen,	GO:0003677~DNA binding,GO:0003899~DNA-directed RNA polymerase activity,GO:0016779~nucleotidyltransferase activity,GO:0034062~RNA polymerase activity,	IPR009668:RNA polymerase I associated factor, A49-like,	hsa00230:Purine metabolism,hsa00240:Pyrimidine metabolism,hsa03020:RNA polymerase,		PIRSF006178:DNA-directed RNA polymerase I, RPA49/RPF53 subunits,		alternative splicing,complete proteome,dna-directed rna polymerase,nucleus,phosphoprotein,polymorphism,Transcription,	chain:DNA-directed RNA polymerase I subunit RPA49,modified residue,sequence conflict,sequence variant,splice variant,
ENSG00000176407	potassium channel modulatory factor 1	Homo sapiens				GO:0006508~proteolysis,GO:0009057~macromolecule catabolic process,GO:0019941~modification-dependent protein catabolic process,GO:0030163~protein catabolic process,GO:0043632~modification-dependent macromolecule catabolic process,GO:0044257~cellular protein catabolic process,GO:0044265~cellular macromolecule catabolic process,GO:0051603~proteolysis involved in cellular protein catabolic process,		GO:0008270~zinc ion binding,GO:0043167~ion binding,GO:0043169~cation binding,GO:0046872~metal ion binding,GO:0046914~transition metal ion binding,	IPR000433:Zinc finger, ZZ-type,IPR007087:Zinc finger, C2H2-type,IPR015880:Zinc finger, C2H2-like,				SM00291:ZnF_ZZ,SM00355:ZnF_C2H2,	coiled coil,complete proteome,ligase,metal-binding,phosphoprotein,ubl conjugation pathway,zinc,zinc-finger,	chain:E3 ubiquitin-protein ligase KCMF1,compositionally biased region:Poly-Pro,compositionally biased region:Poly-Ser,modified residue,sequence conflict,zinc finger region:C2H2-type,zinc finger region:ZZ-type,
ENSG00000172336	processing of precursor 7, ribonuclease P/MRP subunit (S. cerevisiae)	Homo sapiens				GO:0006396~RNA processing,GO:0006399~tRNA metabolic process,GO:0008033~tRNA processing,GO:0034470~ncRNA processing,GO:0034660~ncRNA metabolic process,	GO:0005655~nucleolar ribonuclease P complex,GO:0005730~nucleolus,GO:0030529~ribonucleoprotein complex,GO:0030677~ribonuclease P complex,GO:0030681~multimeric ribonuclease P complex,GO:0031974~membrane-enclosed lumen,GO:0031981~nuclear lumen,GO:0043228~non-membrane-bounded organelle,GO:0043232~intracellular non-membrane-bounded organelle,GO:0043233~organelle lumen,GO:0044452~nucleolar part,GO:0070…	GO:0004518~nuclease activity,GO:0004519~endonuclease activity,GO:0004521~endoribonuclease activity,GO:0004526~ribonuclease P activity,GO:0004540~ribonuclease activity,GO:0004549~tRNA-specific ribonuclease activity,GO:0016891~endoribonuclease activity, producing 5'-phosphomonoesters,GO:0016893~endonuclease activity, active with either ribo- or deoxyribonucleic acids and producing 5'-phosphomonoest…	IPR002775:Alba, DNA/RNA-binding protein,IPR014612:RNase P/MRP, subunit p20,			PIRSF036572:RNase P/MRP, p20 subunit,PIRSF036572:RPP20,		complete proteome,direct protein sequencing,hydrolase,nucleus,trna processing,	chain:Ribonuclease P protein subunit p20,sequence conflict,
ENSG00000197170	proteasome (prosome, macropain) 26S subunit, non-ATPase, 12	Homo sapiens				GO:0000278~mitotic cell cycle,GO:0006508~proteolysis,GO:0006511~ubiquitin-dependent protein catabolic process,GO:0007049~cell cycle,GO:0009057~macromolecule catabolic process,GO:0010498~proteasomal protein catabolic process,GO:0010604~positive regulation of macromolecule metabolic process,GO:0010605~negative regulation of macromolecule metabolic process,GO:0019941~modification-dependent protein c…	GO:0000502~proteasome complex,GO:0005829~cytosol,GO:0005838~proteasome regulatory particle,GO:0022624~proteasome accessory complex,		IPR000717:Proteasome component region PCI,IPR011991:Winged helix repressor DNA-binding,	hsa03050:Proteasome,		PIRSF006839:26S proteasome non-ATPase regulatory subunit 12,	SM00088:PINT,	acetylation,complete proteome,direct protein sequencing,polymorphism,proteasome,protein degradation,	chain:26S proteasome non-ATPase regulatory subunit 12,domain:PCI,modified residue,sequence conflict,sequence variant,
ENSG00000108294	proteasome (prosome, macropain) subunit, beta type, 3	Homo sapiens				GO:0000278~mitotic cell cycle,GO:0006508~proteolysis,GO:0006511~ubiquitin-dependent protein catabolic process,GO:0007049~cell cycle,GO:0009057~macromolecule catabolic process,GO:0010498~proteasomal protein catabolic process,GO:0010604~positive regulation of macromolecule metabolic process,GO:0010605~negative regulation of macromolecule metabolic process,GO:0019941~modification-dependent protein c…	GO:0000502~proteasome complex,GO:0005839~proteasome core complex,	GO:0004175~endopeptidase activity,GO:0004298~threonine-type endopeptidase activity,GO:0008233~peptidase activity,GO:0070003~threonine-type peptidase activity,GO:0070011~peptidase activity, acting on L-amino acid peptides,	IPR001353:Proteasome, alpha and beta subunits,IPR001353:Proteasome, subunit alpha/beta,IPR016050:Proteasome, beta-type subunit, conserved site,	hsa03050:Proteasome,		PIRSF001212:multicatalytic endopeptidase complex chain C9,		acetylation,complete proteome,cytoplasm,direct protein sequencing,host-virus interaction,hydrolase,nucleus,polymorphism,Protease,proteasome,proteinase,threonine protease,	chain:Proteasome subunit beta type-3,modified residue,sequence variant,
ENSG00000165912	protein kinase C and casein kinase substrate in neurons 3	Homo sapiens				GO:0006897~endocytosis,GO:0009894~regulation of catabolic process,GO:0009896~positive regulation of catabolic process,GO:0010324~membrane invagination,GO:0010604~positive regulation of macromolecule metabolic process,GO:0016044~membrane organization,GO:0016192~vesicle-mediated transport,GO:0030100~regulation of endocytosis,GO:0030162~regulation of proteolysis,GO:0031329~regulation of cellular cat…	GO:0005886~plasma membrane,GO:0009898~internal side of plasma membrane,GO:0044459~plasma membrane part,	GO:0008092~cytoskeletal protein binding,	IPR001060:Fps/Fes/Fer/CIP4 homology,IPR001452:Src homology-3 domain,				SM00055:FCH,SM00326:SH3,	cell membrane,coiled coil,complete proteome,cytoplasm,Endocytosis,membrane,phosphoprotein,polymorphism,sh3 domain,	chain:Protein kinase C and casein kinase substrate in neurons protein 3,domain:FCH,domain:SH3,modified residue,sequence variant,
ENSG00000171132	protein kinase C, epsilon	Homo sapiens		h_akapCentrosomePathway:Protein Kinase A at the Centrosome,h_flumazenilPathway:Cardiac Protection Against ROS ,h_ptdinsPathway:Phosphoinositides and their downstream targets.,		GO:0001932~regulation of protein amino acid phosphorylation,GO:0006468~protein amino acid phosphorylation,GO:0006793~phosphorus metabolic process,GO:0006796~phosphate metabolic process,GO:0006917~induction of apoptosis,GO:0007242~intracellular signaling cascade,GO:0010941~regulation of cell death,GO:0010942~positive regulation of cell death,GO:0012502~induction of programmed cell death,GO:0016310…	GO:0005886~plasma membrane,	GO:0000166~nucleotide binding,GO:0001882~nucleoside binding,GO:0001883~purine nucleoside binding,GO:0004672~protein kinase activity,GO:0004674~protein serine/threonine kinase activity,GO:0004697~protein kinase C activity,GO:0004699~calcium-independent protein kinase C activity,GO:0005524~ATP binding,GO:0008270~zinc ion binding,GO:0008289~lipid binding,GO:0017076~purine nucleotide binding,GO:00198…	IPR000008:C2 calcium-dependent membrane targeting,IPR000719:Protein kinase, core,IPR000961:AGC-kinase, C-terminal,IPR002219:Protein kinase C-like, phorbol ester/diacylglycerol binding,IPR002290:Serine/threonine protein kinase,IPR008271:Serine/threonine protein kinase, active site,IPR014376:Protein kinase C, delta/epsilon/eta/theta types,IPR015745:Protein kinase C,IPR017441:Protein kinase, ATP bin…	hsa04270:Vascular smooth muscle contraction,hsa04530:Tight junction,hsa04664:Fc epsilon RI signaling pathway,hsa04666:Fc gamma R-mediated phagocytosis,hsa04930:Type II diabetes mellitus,		PIRSF000551:PKC_delta,	SM00109:C1,SM00133:S_TK_X,SM00220:S_TKc,SM00239:C2,	3d-structure,ATP,atp-binding,complete proteome,duplication,kinase,metal-binding,nucleotide-binding,phorbol ester binding,phospholipid binding,phosphoprotein,phosphotransferase,polymorphism,repeat,serine/threonine-protein kinase,serine/threonine-specific protein kinase,transferase,zinc,zinc-finger,	active site:Proton acceptor,binding site:ATP,chain:Protein kinase C epsilon type,domain:AGC-kinase C-terminal,domain:C2,domain:Protein kinase,modified residue,mutagenesis site,nucleotide phosphate-binding region:ATP,sequence variant,zinc finger region:Phorbol-ester/DAG-type 1,zinc finger region:Phorbol-ester/DAG-type 2,
ENSG00000105568	protein phosphatase 2 (formerly 2A), regulatory subunit A, alpha isoform	Homo sapiens				GO:0000165~MAPKKK cascade,GO:0000188~inactivation of MAPK activity,GO:0001558~regulation of cell growth,GO:0001932~regulation of protein amino acid phosphorylation,GO:0001933~negative regulation of protein amino acid phosphorylation,GO:0006275~regulation of DNA replication,GO:0006396~RNA processing,GO:0006461~protein complex assembly,GO:0006469~negative regulation of protein kinase activity,GO:00…	GO:0000159~protein phosphatase type 2A complex,GO:0000267~cell fraction,GO:0005625~soluble fraction,GO:0005739~mitochondrion,GO:0005829~cytosol,GO:0005856~cytoskeleton,GO:0008287~protein serine/threonine phosphatase complex,GO:0015630~microtubule cytoskeleton,GO:0043228~non-membrane-bounded organelle,GO:0043232~intracellular non-membrane-bounded organelle,	GO:0003823~antigen binding,GO:0008601~protein phosphatase type 2A regulator activity,GO:0019208~phosphatase regulator activity,GO:0019888~protein phosphatase regulator activity,GO:0046982~protein heterodimerization activity,GO:0046983~protein dimerization activity,	IPR000357:HEAT,IPR011989:Armadillo-like helical,	hsa04114:Oocyte meiosis,hsa04310:Wnt signaling pathway,hsa04350:TGF-beta signaling pathway,hsa04530:Tight junction,hsa04730:Long-term depression,		PIRSF005602:serine/threonine-protein phosphataser PP2A regulatory subunit A,		3d-structure,acetylation,centromere,Chromosome partition,complete proteome,direct protein sequencing,polymorphism,repeat,	chain:Serine/threonine-protein phosphatase 2A 65 kDa regulatory subunit A alpha isoform,helix,modified residue,region of interest:Polyoma small and medium T antigens Binding,region of interest:PP2A subunit B binding,region of interest:PP2A subunit C binding,region of interest:SV40 small T antigen binding,repeat:HEAT 1,repeat:HEAT 10,repeat:HEAT 11,repeat:HEAT 12,repeat:HEAT 13,repeat:HEAT 14,repe…
ENSG00000152894	protein tyrosine phosphatase, receptor type, K	Homo sapiens				GO:0000302~response to reactive oxygen species,GO:0006470~protein amino acid dephosphorylation,GO:0006793~phosphorus metabolic process,GO:0006796~phosphate metabolic process,GO:0006928~cell motion,GO:0006979~response to oxidative stress,GO:0007044~cell-substrate junction assembly,GO:0007155~cell adhesion,GO:0007160~cell-matrix adhesion,GO:0007166~cell surface receptor linked signal transduction,G…	GO:0005886~plasma membrane,GO:0005887~integral to plasma membrane,GO:0005911~cell-cell junction,GO:0005912~adherens junction,GO:0009986~cell surface,GO:0016021~integral to membrane,GO:0030054~cell junction,GO:0031224~intrinsic to membrane,GO:0031226~intrinsic to plasma membrane,GO:0031252~cell leading edge,GO:0031256~leading edge membrane,GO:0044459~plasma membrane part,GO:0070161~anchoring junct…	GO:0004721~phosphoprotein phosphatase activity,GO:0004725~protein tyrosine phosphatase activity,GO:0008013~beta-catenin binding,GO:0016791~phosphatase activity,GO:0019198~transmembrane receptor protein phosphatase activity,GO:0019899~enzyme binding,GO:0019900~kinase binding,GO:0019901~protein kinase binding,GO:0045295~gamma-catenin binding,	IPR000242:Protein-tyrosine phosphatase, receptor/non-receptor type,IPR000387:Dual-specific/protein-tyrosine phosphatase, conserved region,IPR000387:Protein-tyrosine phosphatase,IPR000998:MAM,IPR003599:Immunoglobulin subtype,IPR003961:Fibronectin, type III,IPR007110:Immunoglobulin-like,IPR008957:Fibronectin, type III-like fold,IPR013098:Immunoglobulin I-set,IPR013783:Immunoglobulin-like fold,IPR01…			PIRSF002008:receptor tyrosine-protein phosphatase, kappa/mu/T/U types,PIRSF500803:receptor tyrosine-protein phosphatase kappa,	SM00060:FN3,SM00137:MAM,SM00194:PTPc,SM00409:IG,	3d-structure,alternative splicing,cell junction,cell membrane,complete proteome,disulfide bond,glycoprotein,hydrolase,Immunoglobulin domain,membrane,phosphoprotein,phosphoric monoester hydrolase,protein phosphatase,receptor,repeat,signal,transmembrane,	active site:Phosphocysteine intermediate,chain:Receptor-type tyrosine-protein phosphatase kappa,disulfide bond,domain:Fibronectin type-III 1,domain:Fibronectin type-III 2,domain:Fibronectin type-III 3,domain:Fibronectin type-III 4,domain:Ig-like C2-type,domain:MAM,domain:Tyrosine-protein phosphatase 1,domain:Tyrosine-protein phosphatase 2,glycosylation site:N-linked (GlcNAc...),helix,modified res…
ENSG00000204956	protocadherin gamma subfamily A, 1	Homo sapiens				GO:0007155~cell adhesion,GO:0007156~homophilic cell adhesion,GO:0016337~cell-cell adhesion,GO:0022610~biological adhesion,	GO:0005886~plasma membrane,GO:0016021~integral to membrane,GO:0031224~intrinsic to membrane,	GO:0005509~calcium ion binding,GO:0043167~ion binding,GO:0043169~cation binding,GO:0046872~metal ion binding,	IPR002126:Cadherin,IPR013164:Cadherin, N-terminal,IPR015492:Protocadherin gamma,				SM00112:CA,	alternative splicing,calcium,cell adhesion,cell membrane,complete proteome,glycoprotein,membrane,polymorphism,repeat,signal,transmembrane,	chain:Protocadherin gamma-A1,domain:Cadherin 1,domain:Cadherin 2,domain:Cadherin 3,domain:Cadherin 4,domain:Cadherin 5,domain:Cadherin 6,glycosylation site:N-linked (GlcNAc...),sequence variant,signal peptide,splice variant,topological domain:Cytoplasmic,topological domain:Extracellular,transmembrane region,
ENSG00000146676	purine-rich element binding protein B	Homo sapiens				GO:0006350~transcription,GO:0006355~regulation of transcription, DNA-dependent,GO:0009890~negative regulation of biosynthetic process,GO:0010558~negative regulation of macromolecule biosynthetic process,GO:0010605~negative regulation of macromolecule metabolic process,GO:0010629~negative regulation of gene expression,GO:0016481~negative regulation of transcription,GO:0031327~negative regulation o…	GO:0000228~nuclear chromosome,GO:0005657~replication fork,GO:0005662~DNA replication factor A complex,GO:0005694~chromosome,GO:0030894~replisome,GO:0032993~protein-DNA complex,GO:0043228~non-membrane-bounded organelle,GO:0043232~intracellular non-membrane-bounded organelle,GO:0043596~nuclear replication fork,GO:0043601~nuclear replisome,GO:0044427~chromosomal part,GO:0044454~nuclear chromosome pa…	GO:0000900~translation repressor activity, nucleic acid binding,GO:0003677~DNA binding,GO:0003690~double-stranded DNA binding,GO:0003697~single-stranded DNA binding,GO:0003700~transcription factor activity,GO:0003723~RNA binding,GO:0003729~mRNA binding,GO:0008134~transcription factor binding,GO:0016564~transcription repressor activity,GO:0016566~specific transcriptional repressor activity,GO:0030…	IPR006628:PUR-alpha/beta/gamma, DNA/RNA-binding,				SM00712:PUR,	acetylation,complete proteome,dna-binding,nucleus,phosphoprotein,repressor,Transcription,transcription regulation,	chain:Transcriptional activator protein Pur- beta,compositionally biased region:Gly-rich,modified residue,
ENSG00000179889	pyridoxal-dependent decarboxylase domain containing 1	Homo sapiens						GO:0016831~carboxy-lyase activity,GO:0019842~vitamin binding,GO:0030170~pyridoxal phosphate binding,GO:0048037~cofactor binding,GO:0070279~vitamin B6 binding,	IPR002129:Pyridoxal phosphate-dependent decarboxylase,IPR015421:Pyridoxal phosphate-dependent transferase, major region, subdomain 1,					alternative splicing,complete proteome,decarboxylase,lyase,phosphoprotein,polymorphism,pyridoxal phosphate,	chain:Pyridoxal-dependent decarboxylase domain- containing protein 1,modified residue,sequence conflict,sequence variant,splice variant,
ENSG00000111445	replication factor C (activator 1) 5, 36.5kDa	Homo sapiens				GO:0006259~DNA metabolic process,GO:0006260~DNA replication,GO:0006281~DNA repair,GO:0006289~nucleotide-excision repair,GO:0006297~nucleotide-excision repair, DNA gap filling,GO:0006974~response to DNA damage stimulus,GO:0033554~cellular response to stress,	GO:0005654~nucleoplasm,GO:0005657~replication fork,GO:0005663~DNA replication factor C complex,GO:0005694~chromosome,GO:0031974~membrane-enclosed lumen,GO:0031981~nuclear lumen,GO:0043228~non-membrane-bounded organelle,GO:0043232~intracellular non-membrane-bounded organelle,GO:0043233~organelle lumen,GO:0044427~chromosomal part,GO:0070013~intracellular organelle lumen,	GO:0000166~nucleotide binding,GO:0001882~nucleoside binding,GO:0001883~purine nucleoside binding,GO:0003677~DNA binding,GO:0003689~DNA clamp loader activity,GO:0005524~ATP binding,GO:0008094~DNA-dependent ATPase activity,GO:0016887~ATPase activity,GO:0017076~purine nucleotide binding,GO:0019899~enzyme binding,GO:0030554~adenyl nucleotide binding,GO:0032553~ribonucleotide binding,GO:0032555~purine…	IPR003593:ATPase, AAA+ type, core,IPR003959:ATPase, AAA-type, core,IPR013748:Replication factor C,	hsa03030:DNA replication,hsa03420:Nucleotide excision repair,hsa03430:Mismatch repair,		PIRSF004274:phage T4 DNA polymerase accessory protein 44,	SM00382:AAA,	3d-structure,atp-binding,complete proteome,dna replication,nucleotide-binding,nucleus,polymorphism,	chain:Replication factor C subunit 5,helix,nucleotide phosphate-binding region:ATP,sequence variant,strand,turn,
ENSG00000067533	ribosomal RNA processing 15 homolog (S. cerevisiae)	Homo sapiens							IPR012459:Protein of unknown function DUF1665,					acetylation,coiled coil,complete proteome,phosphoprotein,polymorphism,	chain:RRP15-like protein,modified residue,sequence conflict,sequence variant,
ENSG00000112306	ribosomal protein S12; ribosomal protein S12 pseudogene 4; ribosomal protein S12 pseudogene 11; ribosomal protein S12 pseudogene 9	Homo sapiens				GO:0006412~translation,GO:0006414~translational elongation,	GO:0005829~cytosol,GO:0005840~ribosome,GO:0015935~small ribosomal subunit,GO:0022626~cytosolic ribosome,GO:0022627~cytosolic small ribosomal subunit,GO:0030529~ribonucleoprotein complex,GO:0033279~ribosomal subunit,GO:0043228~non-membrane-bounded organelle,GO:0043232~intracellular non-membrane-bounded organelle,GO:0044445~cytosolic part,	GO:0003735~structural constituent of ribosome,GO:0005198~structural molecule activity,	IPR000530:Ribosomal protein S12e,IPR004038:Ribosomal protein L7Ae/L30e/S12e/Gadd45,	hsa03010:Ribosome,		PIRSF002132:ribosomal protein S12,		acetylation,blocked amino end,complete proteome,cytoplasm,direct protein sequencing,protein biosynthesis,ribonucleoprotein,ribosomal protein,ribosome,	chain:40S ribosomal protein S12,modified residue,sequence conflict,
ENSG00000070423	ring finger protein 126	Homo sapiens						GO:0008270~zinc ion binding,GO:0043167~ion binding,GO:0043169~cation binding,GO:0046872~metal ion binding,GO:0046914~transition metal ion binding,	IPR001841:Zinc finger, RING-type,IPR017907:Zinc finger, RING-type, conserved site,IPR018957:Zinc finger, C3HC4 RING-type,			PIRSF036865:RING finger proteins 126/364, vertebrate type,	SM00184:RING,	alternative splicing,complete proteome,metal-binding,phosphoprotein,polymorphism,zinc,zinc-finger,	chain:RING finger protein 126,compositionally biased region:Ser-rich,modified residue,sequence variant,splice variant,zinc finger region:RING-type,
ENSG00000189051	ring finger protein 222	Homo sapiens					GO:0016021~integral to membrane,GO:0031224~intrinsic to membrane,	GO:0008270~zinc ion binding,GO:0043167~ion binding,GO:0043169~cation binding,GO:0046872~metal ion binding,GO:0046914~transition metal ion binding,	IPR001841:Zinc finger, RING-type,IPR017907:Zinc finger, RING-type, conserved site,IPR018957:Zinc finger, C3HC4 RING-type,				SM00184:RING,	complete proteome,membrane,metal-binding,transmembrane,zinc,zinc-finger,	chain:RING finger protein 222,transmembrane region,zinc finger region:RING-type,
ENSG00000184178	sec1 family domain containing 2	Homo sapiens				GO:0006887~exocytosis,GO:0006904~vesicle docking during exocytosis,GO:0008104~protein localization,GO:0015031~protein transport,GO:0016192~vesicle-mediated transport,GO:0022406~membrane docking,GO:0032940~secretion by cell,GO:0045184~establishment of protein localization,GO:0046903~secretion,GO:0048278~vesicle docking,			IPR001619:Sec1-like protein,					alternative splicing,complete proteome,polymorphism,protein transport,transport,	chain:Sec1 family domain-containing protein 2,compositionally biased region:Poly-Ala,sequence variant,splice variant,
ENSG00000112320	sine oculis binding protein homolog (Drosophila)	Homo sapiens				GO:0007423~sensory organ development,GO:0007600~sensory perception,GO:0007605~sensory perception of sound,GO:0007610~behavior,GO:0007626~locomotory behavior,GO:0042471~ear morphogenesis,GO:0042472~inner ear morphogenesis,GO:0043583~ear development,GO:0048562~embryonic organ morphogenesis,GO:0048568~embryonic organ development,GO:0048598~embryonic morphogenesis,GO:0048839~inner ear development,GO:…		GO:0008270~zinc ion binding,GO:0043167~ion binding,GO:0043169~cation binding,GO:0046872~metal ion binding,GO:0046914~transition metal ion binding,						complete proteome,metal-binding,polymorphism,repeat,zinc,zinc-finger,	chain:Sine oculis-binding protein homolog,compositionally biased region:Pro-rich,sequence conflict,sequence variant,zinc finger region:FCS-type 1,zinc finger region:FCS-type 2,
ENSG00000104969	small glutamine-rich tetratricopeptide repeat (TPR)-containing, alpha	Homo sapiens							IPR001440:Tetratricopeptide TPR-1,IPR011990:Tetratricopeptide-like helical,IPR013026:Tetratricopeptide region,IPR019734:Tetratricopeptide repeat,				SM00028:TPR,	3d-structure,acetylation,Chaperone,complete proteome,direct protein sequencing,host-virus interaction,phosphoprotein,repeat,tpr repeat,	chain:Small glutamine-rich tetratricopeptide repeat-containing protein alpha,compositionally biased region:Gln-rich,helix,modified residue,repeat:TPR 1,repeat:TPR 2,repeat:TPR 3,turn,
ENSG00000163581	solute carrier family 2 (facilitated glucose transporter), member 2	Homo sapiens				GO:0008643~carbohydrate transport,GO:0008645~hexose transport,GO:0015749~monosaccharide transport,GO:0015755~fructose transport,GO:0015758~glucose transport,GO:0055085~transmembrane transport,	GO:0000267~cell fraction,GO:0005624~membrane fraction,GO:0005626~insoluble fraction,GO:0005768~endosome,GO:0005829~cytosol,GO:0005886~plasma membrane,GO:0005887~integral to plasma membrane,GO:0005903~brush border,GO:0016021~integral to membrane,GO:0016323~basolateral plasma membrane,GO:0031224~intrinsic to membrane,GO:0031226~intrinsic to plasma membrane,GO:0031253~cell projection membrane,GO:003…	GO:0005158~insulin receptor binding,GO:0005351~sugar:hydrogen symporter activity,GO:0005355~glucose transmembrane transporter activity,GO:0005402~cation:sugar symporter activity,GO:0015145~monosaccharide transmembrane transporter activity,GO:0015149~hexose transmembrane transporter activity,GO:0015293~symporter activity,GO:0015294~solute:cation symporter activity,GO:0015295~solute:hydrogen sympor…	IPR002440:Glucose transporter, type 2 (GLUT2),IPR003663:Sugar/inositol transporter,IPR005828:General substrate transporter,IPR005829:Sugar transporter, conserved site,	hsa04930:Type II diabetes mellitus,hsa04950:Maturity onset diabetes of the young,	Diabetes mellitus, noninsulin-dependent,Fanconi-Bickel syndrome,			complete proteome,disease mutation,glycoprotein,membrane,polymorphism,sugar transport,transmembrane,transport,	chain:Solute carrier family 2, facilitated glucose transporter member 2,glycosylation site:N-linked (GlcNAc...),sequence conflict,sequence variant,topological domain:Cytoplasmic,topological domain:Extracellular,transmembrane region,
ENSG00000168065	solute carrier family 22 (organic anion/urate transporter), member 11	Homo sapiens				GO:0006811~ion transport,GO:0006820~anion transport,GO:0015711~organic anion transport,GO:0055085~transmembrane transport,	GO:0005886~plasma membrane,GO:0005887~integral to plasma membrane,GO:0009897~external side of plasma membrane,GO:0009986~cell surface,GO:0016021~integral to membrane,GO:0016324~apical plasma membrane,GO:0031224~intrinsic to membrane,GO:0031226~intrinsic to plasma membrane,GO:0044459~plasma membrane part,GO:0045177~apical part of cell,	GO:0008509~anion transmembrane transporter activity,GO:0008514~organic anion transmembrane transporter activity,GO:0015297~antiporter activity,GO:0015300~solute:solute antiporter activity,GO:0015301~anion:anion antiporter activity,GO:0015347~sodium-independent organic anion transmembrane transporter activity,	IPR011701:Major facilitator superfamily MFS-1,					alternative splicing,cell membrane,complete proteome,glycoprotein,ion transport,membrane,polymorphism,transmembrane,transport,	chain:Solute carrier family 22 member 11,glycosylation site:N-linked (GlcNAc...),mutagenesis site,sequence conflict,sequence variant,splice variant,topological domain:Cytoplasmic,topological domain:Extracellular,transmembrane region,
ENSG00000013306	solute carrier family 25, member 39	Homo sapiens				GO:0055085~transmembrane transport,	GO:0005739~mitochondrion,GO:0005740~mitochondrial envelope,GO:0005743~mitochondrial inner membrane,GO:0016021~integral to membrane,GO:0019866~organelle inner membrane,GO:0031090~organelle membrane,GO:0031224~intrinsic to membrane,GO:0031966~mitochondrial membrane,GO:0031967~organelle envelope,GO:0031975~envelope,GO:0044429~mitochondrial part,		IPR001993:Mitochondrial substrate carrier,IPR018108:Mitochondrial substrate/solute carrier,			PIRSF002459:Caenorhabditis probable carrier protein c2,		alternative splicing,complete proteome,heme biosynthesis,membrane,mitochondrion,mitochondrion inner membrane,polymorphism,repeat,transmembrane,transport,	chain:Solute carrier family 25 member 39,repeat:Solcar 1,repeat:Solcar 2,repeat:Solcar 3,sequence conflict,sequence variant,splice variant,transmembrane region,
ENSG00000101438	solute carrier family 32 (GABA vesicular transporter), member 1	Homo sapiens				GO:0006836~neurotransmitter transport,GO:0006865~amino acid transport,GO:0015804~neutral amino acid transport,GO:0015816~glycine transport,GO:0015837~amine transport,GO:0015849~organic acid transport,GO:0046942~carboxylic acid transport,	GO:0008021~synaptic vesicle,GO:0012505~endomembrane system,GO:0012506~vesicle membrane,GO:0016021~integral to membrane,GO:0016023~cytoplasmic membrane-bounded vesicle,GO:0030135~coated vesicle,GO:0030136~clathrin-coated vesicle,GO:0030659~cytoplasmic vesicle membrane,GO:0030662~coated vesicle membrane,GO:0030665~clathrin coated vesicle membrane,GO:0030672~synaptic vesicle membrane,GO:0031090~orga…	GO:0005275~amine transmembrane transporter activity,GO:0005280~hydrogen:amino acid symporter activity,GO:0005416~cation:amino acid symporter activity,GO:0015171~amino acid transmembrane transporter activity,GO:0015175~neutral amino acid transmembrane transporter activity,GO:0015179~L-amino acid transmembrane transporter activity,GO:0015185~L-gamma-aminobutyric acid transmembrane transporter activ…	IPR013057:Amino acid transporter, transmembrane,					complete proteome,cytoplasmic vesicle,glycoprotein,membrane,neurotransmitter transport,polymorphism,transmembrane,transport,	chain:Vesicular inhibitory amino acid transporter,glycosylation site:N-linked (GlcNAc...),sequence conflict,sequence variant,topological domain:Cytoplasmic,topological domain:Lumenal, vesicle,transmembrane region,
ENSG00000065054	solute carrier family 9 (sodium/hydrogen exchanger), member 3 regulator 2	Homo sapiens				GO:0006461~protein complex assembly,GO:0007423~sensory organ development,GO:0043583~ear development,GO:0043933~macromolecular complex subunit organization,GO:0048839~inner ear development,GO:0065003~macromolecular complex assembly,GO:0070271~protein complex biogenesis,	GO:0005886~plasma membrane,GO:0016324~apical plasma membrane,GO:0019898~extrinsic to membrane,GO:0044459~plasma membrane part,GO:0045177~apical part of cell,	GO:0008022~protein C-terminus binding,GO:0016247~channel regulator activity,	IPR001478:PDZ/DHR/GLGF,IPR015098:EBP50, C-terminal,IPR017300:Na(+)/H(+) exchange regulatory cofactor NHE-RF,	hsa04960:Aldosterone-regulated sodium reabsorption,		PIRSF037866:EBP50,PIRSF037866:Na(+)/H(+) exchange regulatory cofactor NHE-RF,	SM00228:PDZ,	3d-structure,alternative splicing,complete proteome,membrane,nucleus,phosphoprotein,repeat,	chain:Na(+)/H(+) exchange regulatory cofactor NHE-RF2,domain:PDZ 1,domain:PDZ 2,helix,modified residue,sequence conflict,splice variant,strand,
ENSG00000175898	sphingosine-1-phosphate receptor 2	Homo sapiens				GO:0000165~MAPKKK cascade,GO:0000187~activation of MAPK activity,GO:0006468~protein amino acid phosphorylation,GO:0006793~phosphorus metabolic process,GO:0006796~phosphate metabolic process,GO:0007166~cell surface receptor linked signal transduction,GO:0007186~G-protein coupled receptor protein signaling pathway,GO:0007242~intracellular signaling cascade,GO:0007243~protein kinase cascade,GO:00076…	GO:0005886~plasma membrane,GO:0016021~integral to membrane,GO:0031224~intrinsic to membrane,	GO:0001619~lysosphingolipid and lysophosphatidic acid receptor activity,GO:0008289~lipid binding,	IPR000276:7TM GPCR, rhodopsin-like,IPR004061:Sphingosine 1-phosphate receptor,IPR004063:EDG-5 sphingosine 1-phosphate receptor,IPR017452:GPCR, rhodopsin-like superfamily,	hsa04080:Neuroactive ligand-receptor interaction,		PIRSF005435:LPAR1/S1PR1-like lysophospholipid receptor,PIRSF501018:sphingosine 1-phosphate receptor 1-5,PIRSF800006:rhodopsin-like G protein-coupled receptors,		3d-structure,cell membrane,complete proteome,g-protein coupled receptor,glycoprotein,lipoprotein,membrane,palmitate,phosphoprotein,receptor,transducer,transmembrane,	chain:Sphingosine 1-phosphate receptor 2,glycosylation site:N-linked (GlcNAc...),helix,lipid moiety-binding region:S-palmitoyl cysteine,modified residue,sequence conflict,strand,topological domain:Cytoplasmic,topological domain:Extracellular,transmembrane region,turn,
ENSG00000136158	sprouty homolog 2 (Drosophila)	Homo sapiens				GO:0001763~morphogenesis of a branching structure,GO:0006469~negative regulation of protein kinase activity,GO:0007267~cell-cell signaling,GO:0007423~sensory organ development,GO:0007600~sensory perception,GO:0007605~sensory perception of sound,GO:0019220~regulation of phosphate metabolic process,GO:0030323~respiratory tube development,GO:0030324~lung development,GO:0033673~negative regulation of…	GO:0005829~cytosol,GO:0005856~cytoskeleton,GO:0005874~microtubule,GO:0005886~plasma membrane,GO:0015630~microtubule cytoskeleton,GO:0043228~non-membrane-bounded organelle,GO:0043232~intracellular non-membrane-bounded organelle,GO:0044430~cytoskeletal part,		IPR007875:Sprouty,	hsa04630:Jak-STAT signaling pathway,		PIRSF038352:sprouty homolog protein,		3d-structure,cell membrane,complete proteome,cytoplasm,developmental protein,membrane,microtubule,phosphoprotein,polymorphism,	chain:Protein sprouty homolog 2,compositionally biased region:Cys-rich,compositionally biased region:Poly-Ser,domain:SPR,modified residue,sequence variant,
ENSG00000108055	structural maintenance of chromosomes 3	Homo sapiens				GO:0000087~M phase of mitotic cell cycle,GO:0000226~microtubule cytoskeleton organization,GO:0000278~mitotic cell cycle,GO:0000279~M phase,GO:0000280~nuclear division,GO:0006259~DNA metabolic process,GO:0006281~DNA repair,GO:0006974~response to DNA damage stimulus,GO:0007010~cytoskeleton organization,GO:0007017~microtubule-based process,GO:0007049~cell cycle,GO:0007051~spindle organization,GO:000…	GO:0000228~nuclear chromosome,GO:0000785~chromatin,GO:0000793~condensed chromosome,GO:0000794~condensed nuclear chromosome,GO:0000795~synaptonemal complex,GO:0000800~lateral element,GO:0000922~spindle pole,GO:0005576~extracellular region,GO:0005578~proteinaceous extracellular matrix,GO:0005604~basement membrane,GO:0005694~chromosome,GO:0005819~spindle,GO:0005856~cytoskeleton,GO:0008278~cohesin co…	GO:0000166~nucleotide binding,GO:0001882~nucleoside binding,GO:0001883~purine nucleoside binding,GO:0003774~motor activity,GO:0003777~microtubule motor activity,GO:0005524~ATP binding,GO:0017076~purine nucleotide binding,GO:0030554~adenyl nucleotide binding,GO:0032553~ribonucleotide binding,GO:0032555~purine ribonucleotide binding,GO:0032559~adenyl ribonucleotide binding,GO:0045502~dynein binding…	IPR003395:RecF/RecN/SMC protein, N-terminal,IPR010935:SMCs flexible hinge,IPR017871:ABC transporter, conserved site,	hsa04110:Cell cycle,hsa04114:Oocyte meiosis,	Cornelia de Lange syndrome 3,	PIRSF005719:structural maintenance of chromosomes protein,		acetylation,atp-binding,cell cycle,cell division,coiled coil,complete proteome,disease mutation,DNA damage,dna repair,meiosis,mitosis,nucleotide-binding,nucleus,phosphoprotein,	chain:Structural maintenance of chromosomes protein 3,compositionally biased region:Ala/Asp-rich (DA-box),modified residue,nucleotide phosphate-binding region:ATP,region of interest:Flexible hinge,sequence conflict,sequence variant,
ENSG00000136478	testis expressed 2	Homo sapiens				GO:0006643~membrane lipid metabolic process,GO:0006665~sphingolipid metabolic process,	GO:0016021~integral to membrane,GO:0031224~intrinsic to membrane,		IPR001849:Pleckstrin homology,IPR019411:Protein of unknown function DUF2404, transmembrane,				SM00233:PH,	alternative splicing,complete proteome,glycoprotein,membrane,phosphoprotein,polymorphism,transmembrane,	chain:Testis-expressed sequence 2 protein,compositionally biased region:Poly-Glu,compositionally biased region:Poly-Pro,compositionally biased region:Poly-Ser,glycosylation site:N-linked (GlcNAc...),modified residue,sequence conflict,sequence variant,splice variant,transmembrane region,
ENSG00000143337	torsin A interacting protein 1	Homo sapiens					GO:0016021~integral to membrane,GO:0031224~intrinsic to membrane,		IPR008662:Lamina-associated polypeptide 1C,					alternative splicing,coiled coil,complete proteome,glycoprotein,membrane,nucleus,phosphoprotein,polymorphism,transmembrane,	chain:Torsin-1A-interacting protein 1,glycosylation site:N-linked (GlcNAc...),modified residue,sequence conflict,sequence variant,splice variant,topological domain:Lumenal,topological domain:Nuclear,transmembrane region,
ENSG00000181585	transmembrane inner ear	Homo sapiens				GO:0007423~sensory organ development,GO:0007600~sensory perception,GO:0007605~sensory perception of sound,GO:0042471~ear morphogenesis,GO:0042472~inner ear morphogenesis,GO:0043583~ear development,GO:0048562~embryonic organ morphogenesis,GO:0048568~embryonic organ development,GO:0048598~embryonic morphogenesis,GO:0048839~inner ear development,GO:0050877~neurological system process,GO:0050890~cogn…	GO:0016021~integral to membrane,GO:0031224~intrinsic to membrane,				Deafness, autosomal recessive 6,			complete proteome,deafness,disease mutation,membrane,non-syndromic deafness,signal,transmembrane,	chain:Transmembrane inner ear expressed protein,compositionally biased region:Lys-rich,sequence conflict,sequence variant,signal peptide,topological domain:Cytoplasmic,topological domain:Extracellular,transmembrane region,
ENSG00000204713	tripartite motif-containing 27	Homo sapiens				GO:0000122~negative regulation of transcription from RNA polymerase II promoter,GO:0006350~transcription,GO:0006355~regulation of transcription, DNA-dependent,GO:0006357~regulation of transcription from RNA polymerase II promoter,GO:0006461~protein complex assembly,GO:0007276~gamete generation,GO:0007283~spermatogenesis,GO:0008283~cell proliferation,GO:0009890~negative regulation of biosynthetic …	GO:0000267~cell fraction,GO:0005624~membrane fraction,GO:0005626~insoluble fraction,GO:0005635~nuclear envelope,GO:0005654~nucleoplasm,GO:0005886~plasma membrane,GO:0005887~integral to plasma membrane,GO:0012505~endomembrane system,GO:0016021~integral to membrane,GO:0031090~organelle membrane,GO:0031224~intrinsic to membrane,GO:0031226~intrinsic to plasma membrane,GO:0031965~nuclear membrane,GO:0…	GO:0003677~DNA binding,GO:0004672~protein kinase activity,GO:0004713~protein tyrosine kinase activity,GO:0004714~transmembrane receptor protein tyrosine kinase activity,GO:0008270~zinc ion binding,GO:0043167~ion binding,GO:0043169~cation binding,GO:0046872~metal ion binding,GO:0046914~transition metal ion binding,	IPR000315:Zinc finger, B-box,IPR001841:Zinc finger, RING-type,IPR001870:B302 (SPRY)-like,IPR003877:SPla/RYanodine receptor SPRY,IPR003879:Butyrophylin-like,IPR006574:SPRY-associated,IPR017907:Zinc finger, RING-type, conserved site,IPR018355:SPla/RYanodine receptor subgroup,IPR018957:Zinc finger, C3HC4 RING-type,				SM00184:RING,SM00336:BBOX,SM00449:SPRY,SM00589:PRY,	alternative splicing,chromosomal rearrangement,coiled coil,complete proteome,cytoplasm,DNA binding,dna-binding,metal-binding,nucleus,Proto-oncogene,repressor,Transcription,transcription regulation,transforming protein,zinc,zinc finger,zinc-finger,	chain:Zinc finger protein RFP,domain:B30.2/SPRY,sequence conflict,site:Breakpoint for translocation to form the RFP/RET oncogene,splice variant,zinc finger region:B box-type,zinc finger region:RING-type,
ENSG00000104804	tubby like protein 2	Homo sapiens				GO:0007600~sensory perception,GO:0007601~visual perception,GO:0050877~neurological system process,GO:0050890~cognition,GO:0050953~sensory perception of light stimulus,			IPR000007:Tubby, C-terminal,IPR005398:Tubby, N-terminal,IPR018066:Tubby, C-terminal, conserved site,			PIRSF018114:tubby protein,		complete proteome,cytoplasm,polymorphism,Secreted,	chain:Tubby-related protein 2,sequence conflict,sequence variant,
ENSG00000184811	tumor suppressor candidate 5	Homo sapiens					GO:0016021~integral to membrane,GO:0031224~intrinsic to membrane,		IPR007593:Interferon-induced transmembrane protein,			PIRSF037363:PIRSF037363,		complete proteome,membrane,polymorphism,transmembrane,	chain:Tumor suppressor candidate 5,sequence variant,transmembrane region,
ENSG00000164828	unc-84 homolog A (C. elegans)	Homo sapiens					GO:0005635~nuclear envelope,GO:0005637~nuclear inner membrane,GO:0005639~integral to nuclear inner membrane,GO:0012505~endomembrane system,GO:0016021~integral to membrane,GO:0019866~organelle inner membrane,GO:0031090~organelle membrane,GO:0031224~intrinsic to membrane,GO:0031229~intrinsic to nuclear inner membrane,GO:0031300~intrinsic to organelle membrane,GO:0031301~integral to organelle membra…		IPR012919:Sad1/UNC-like, C-terminal,IPR018539:RNA-binding, mitochondrial,					alternative splicing,coiled coil,complete proteome,membrane,nucleus,phosphoprotein,polymorphism,Signal-anchor,transmembrane,	chain:Protein unc-84 homolog A,domain:SUN,modified residue,region of interest:EMD-binding,region of interest:LMNA-binding,region of interest:SYNE2-binding,sequence conflict,sequence variant,splice variant,topological domain:Nuclear,topological domain:Perinuclear space,transmembrane region,
ENSG00000181408	urotensin 2 receptor	Homo sapiens				GO:0001558~regulation of cell growth,GO:0001977~renal system process involved in regulation of blood volume,GO:0003013~circulatory system process,GO:0003014~renal system process,GO:0003071~renal system process involved in regulation of systemic arterial blood pressure,GO:0003073~regulation of systemic arterial blood pressure,GO:0003074~regulation of diuresis,GO:0003077~negative regulation of diur…	GO:0005768~endosome,GO:0005769~early endosome,GO:0005886~plasma membrane,GO:0016021~integral to membrane,GO:0031224~intrinsic to membrane,GO:0055037~recycling endosome,	GO:0001653~peptide receptor activity,GO:0008528~peptide receptor activity, G-protein coupled,GO:0042277~peptide binding,	IPR000276:7TM GPCR, rhodopsin-like,IPR000670:Urotensin II receptor,IPR017452:GPCR, rhodopsin-like superfamily,	hsa04080:Neuroactive ligand-receptor interaction,		PIRSF038575:urotensin II receptor,PIRSF800006:rhodopsin-like G protein-coupled receptors,		cell membrane,complete proteome,disulfide bond,g-protein coupled receptor,glycoprotein,membrane,polymorphism,receptor,transducer,transmembrane,	chain:Urotensin II receptor,disulfide bond,glycosylation site:N-linked (GlcNAc...),sequence variant,topological domain:Cytoplasmic,topological domain:Extracellular,transmembrane region,
ENSG00000204103	v-maf musculoaponeurotic fibrosarcoma oncogene homolog B (avian)	Homo sapiens				GO:0003002~regionalization,GO:0006350~transcription,GO:0006355~regulation of transcription, DNA-dependent,GO:0006357~regulation of transcription from RNA polymerase II promoter,GO:0007379~segment specification,GO:0007389~pattern specification process,GO:0007423~sensory organ development,GO:0007585~respiratory gaseous exchange,GO:0009891~positive regulation of biosynthetic process,GO:0010557~posit…	GO:0005654~nucleoplasm,GO:0005667~transcription factor complex,GO:0031974~membrane-enclosed lumen,GO:0031981~nuclear lumen,GO:0043233~organelle lumen,GO:0044451~nucleoplasm part,GO:0070013~intracellular organelle lumen,	GO:0003677~DNA binding,GO:0003700~transcription factor activity,GO:0008134~transcription factor binding,GO:0030528~transcription regulator activity,GO:0043565~sequence-specific DNA binding,	IPR004826:Maf transcription factor,IPR004827:Basic-leucine zipper (bZIP) transcription factor,IPR013592:Maf transcription factor, N-terminal,		Common variants at 30 loci contribute to polygenic dyslipidemia,Genome-wide association scan identifies candidate polymorphisms associated with differential response to anti-TNF treatment in Rheumatoid Arthritis,	PIRSF001670:maf transforming protein,	SM00338:BRLZ,	activator,complete proteome,dna-binding,isopeptide bond,nucleus,Proto-oncogene,repressor,Transcription,transcription regulation,tumor suppressor,ubl conjugation,	chain:Transcription factor MafB,compositionally biased region:Poly-His,cross-link:Glycyl lysine isopeptide (Lys-Gly) (interchain with G-Cter in SUMO),DNA-binding region:Basic motif,domain:Leucine-zipper,sequence conflict,
ENSG00000176105	v-yes-1 Yamaguchi sarcoma viral oncogene homolog 1	Homo sapiens				GO:0006468~protein amino acid phosphorylation,GO:0006793~phosphorus metabolic process,GO:0006796~phosphate metabolic process,GO:0008643~carbohydrate transport,GO:0008645~hexose transport,GO:0015749~monosaccharide transport,GO:0015758~glucose transport,GO:0016310~phosphorylation,GO:0046777~protein amino acid autophosphorylation,	GO:0000267~cell fraction,GO:0005624~membrane fraction,GO:0005626~insoluble fraction,GO:0005829~cytosol,	GO:0000166~nucleotide binding,GO:0001882~nucleoside binding,GO:0001883~purine nucleoside binding,GO:0004672~protein kinase activity,GO:0004713~protein tyrosine kinase activity,GO:0004715~non-membrane spanning protein tyrosine kinase activity,GO:0005524~ATP binding,GO:0017076~purine nucleotide binding,GO:0030554~adenyl nucleotide binding,GO:0032553~ribonucleotide binding,GO:0032555~purine ribonucl…	IPR000719:Protein kinase, core,IPR000980:SH2 motif,IPR001245:Tyrosine protein kinase,IPR001452:Src homology-3 domain,IPR008266:Tyrosine protein kinase, active site,IPR017441:Protein kinase, ATP binding site,	hsa04520:Adherens junction,hsa04530:Tight junction,		PIRSF000601:tyrosine-protein kinase, proto-oncogene SRC type,	SM00219:TyrKc,SM00252:SH2,SM00326:SH3,	3d-structure,atp-binding,complete proteome,cytoplasm,kinase,lipoprotein,myristate,nucleotide-binding,phosphoprotein,polymorphism,Proto-oncogene,SH2 domain,sh3 domain,transferase,tyrosine-protein kinase,	active site:Proton acceptor,binding site:ATP,chain:Proto-oncogene tyrosine-protein kinase Yes,domain:Protein kinase,domain:SH2,domain:SH3,helix,lipid moiety-binding region:N-myristoyl glycine,modified residue,nucleotide phosphate-binding region:ATP,sequence variant,strand,turn,
ENSG00000108828	vesicle amine transport protein 1 homolog (T. californica)	Homo sapiens			Energy production and conversion / General function prediction only,	GO:0008361~regulation of cell size,GO:0016049~cell growth,GO:0032535~regulation of cellular component size,GO:0040007~growth,GO:0055114~oxidation reduction,	GO:0016021~integral to membrane,GO:0031224~intrinsic to membrane,	GO:0003677~DNA binding,GO:0008270~zinc ion binding,GO:0043167~ion binding,GO:0043169~cation binding,GO:0046872~metal ion binding,GO:0046914~transition metal ion binding,	IPR002085:Alcohol dehydrogenase superfamily, zinc-containing,IPR002364:Quinone oxidoreductase/zeta-crystallin, conserved site,IPR013149:Alcohol dehydrogenase, zinc-binding,IPR013154:Alcohol dehydrogenase GroES-like,IPR016040:NAD(P)-binding domain,					acetylation,complete proteome,direct protein sequencing,oxidoreductase,	chain:Synaptic vesicle membrane protein VAT-1 homolog,modified residue,sequence conflict,
ENSG00000119614	visual system homeobox 2	Homo sapiens				GO:0001654~eye development,GO:0006350~transcription,GO:0006355~regulation of transcription, DNA-dependent,GO:0006357~regulation of transcription from RNA polymerase II promoter,GO:0007423~sensory organ development,GO:0007600~sensory perception,GO:0007601~visual perception,GO:0008284~positive regulation of cell proliferation,GO:0008285~negative regulation of cell proliferation,GO:0009891~positive …	GO:0005730~nucleolus,GO:0031974~membrane-enclosed lumen,GO:0031981~nuclear lumen,GO:0043228~non-membrane-bounded organelle,GO:0043232~intracellular non-membrane-bounded organelle,GO:0043233~organelle lumen,GO:0070013~intracellular organelle lumen,	GO:0003677~DNA binding,GO:0003700~transcription factor activity,GO:0030528~transcription regulator activity,GO:0043565~sequence-specific DNA binding,	IPR001356:Homeobox,IPR003654:Paired-like homeodomain protein, OAR,IPR012287:Homeodomain-related,IPR017970:Homeobox, conserved site,		Microphthalmia, isolated 2,Microphthalmia, isolated, with coloboma 3,		SM00389:HOX,	acetylation,cataract,complete proteome,developmental protein,disease mutation,dna-binding,Homeobox,microphthalmia,nucleus,polymorphism,sensory transduction,Transcription,transcription regulation,vision,	chain:Visual system homeobox 2,compositionally biased region:Asp/Glu-rich (acidic),compositionally biased region:Pro-rich,compositionally biased region:Ser/Thr-rich,DNA-binding region:Homeobox,domain:CVC,modified residue,sequence variant,short sequence motif:OAR,
ENSG00000186187	zinc and ring finger 1	Homo sapiens				GO:0006508~proteolysis,GO:0009057~macromolecule catabolic process,GO:0019941~modification-dependent protein catabolic process,GO:0030163~protein catabolic process,GO:0043632~modification-dependent macromolecule catabolic process,GO:0044257~cellular protein catabolic process,GO:0044265~cellular macromolecule catabolic process,GO:0051603~proteolysis involved in cellular protein catabolic process,	GO:0000323~lytic vacuole,GO:0005764~lysosome,GO:0005768~endosome,GO:0005773~vacuole,GO:0005886~plasma membrane,GO:0019898~extrinsic to membrane,GO:0030054~cell junction,GO:0031410~cytoplasmic vesicle,GO:0031982~vesicle,GO:0044459~plasma membrane part,GO:0045202~synapse,	GO:0008270~zinc ion binding,GO:0043167~ion binding,GO:0043169~cation binding,GO:0046872~metal ion binding,GO:0046914~transition metal ion binding,	IPR001841:Zinc finger, RING-type,IPR017907:Zinc finger, RING-type, conserved site,IPR018957:Zinc finger, C3HC4 RING-type,				SM00184:RING,	alternative splicing,cell junction,complete proteome,cytoplasmic vesicle,endosome,ligase,lipoprotein,lysosome,membrane,metal-binding,myristate,phosphoprotein,synapse,ubl conjugation pathway,zinc,zinc-finger,	chain:E3 ubiquitin-protein ligase ZNRF1,lipid moiety-binding region:N-myristoyl glycine,modified residue,mutagenesis site,region of interest:Required for endosomal and lysosomal localization and myristoylation,splice variant,zinc finger region:RING-type; atypical,
ENSG00000100722	zinc finger CCCH-type containing 14	Homo sapiens						GO:0003723~RNA binding,GO:0008270~zinc ion binding,GO:0043167~ion binding,GO:0043169~cation binding,GO:0046872~metal ion binding,GO:0046914~transition metal ion binding,	IPR000571:Zinc finger, CCCH-type,				SM00356:ZnF_C3H1,	acetylation,alternative splicing,complete proteome,metal-binding,nucleus,phosphoprotein,repeat,rna-binding,zinc,zinc-finger,	chain:Zinc finger CCCH domain-containing protein 14,modified residue,sequence conflict,splice variant,zinc finger region:C3H1-type 1,zinc finger region:C3H1-type 2,
ENSG00000179627	zinc finger and BTB domain containing 42	Homo sapiens			General function prediction only,			GO:0008270~zinc ion binding,GO:0043167~ion binding,GO:0043169~cation binding,GO:0046872~metal ion binding,GO:0046914~transition metal ion binding,	IPR000210:BTB/POZ-like,IPR007087:Zinc finger, C2H2-type,IPR011333:BTB/POZ fold,IPR013069:BTB/POZ,IPR013087:Zinc finger, C2H2-type/integrase, DNA-binding,IPR015880:Zinc finger, C2H2-like,				SM00225:BTB,SM00355:ZnF_C2H2,	complete proteome,metal-binding,nucleus,repeat,zinc,zinc-finger,	chain:Zinc finger and BTB domain-containing protein 42,compositionally biased region:Pro-rich,domain:BTB,sequence conflict,zinc finger region:C2H2-type 1,zinc finger region:C2H2-type 2,zinc finger region:C2H2-type 3,zinc finger region:C2H2-type 4,
ENSG00000130182	zinc finger and SCAN domain containing 10	Homo sapiens			General function prediction only,	GO:0006350~transcription,GO:0006355~regulation of transcription, DNA-dependent,GO:0045449~regulation of transcription,GO:0051252~regulation of RNA metabolic process,		GO:0003677~DNA binding,GO:0003700~transcription factor activity,GO:0008270~zinc ion binding,GO:0030528~transcription regulator activity,GO:0043167~ion binding,GO:0043169~cation binding,GO:0046872~metal ion binding,GO:0046914~transition metal ion binding,	IPR003309:Transcriptional regulator SCAN,IPR007087:Zinc finger, C2H2-type,IPR013087:Zinc finger, C2H2-type/integrase, DNA-binding,IPR015880:Zinc finger, C2H2-like,				SM00355:ZnF_C2H2,SM00431:SCAN,	complete proteome,dna-binding,metal-binding,nucleus,repeat,Transcription,transcription regulation,zinc,zinc-finger,	chain:Zinc finger and SCAN domain-containing protein 10,compositionally biased region:Pro-rich,domain:SCAN box,zinc finger region:C2H2-type 1,zinc finger region:C2H2-type 10,zinc finger region:C2H2-type 11,zinc finger region:C2H2-type 12,zinc finger region:C2H2-type 13,zinc finger region:C2H2-type 14,zinc finger region:C2H2-type 2,zinc finger region:C2H2-type 3,zinc finger region:C2H2-type 4,zinc…
ENSG00000147394	zinc finger protein 185 (LIM domain)	Homo sapiens						GO:0008270~zinc ion binding,GO:0043167~ion binding,GO:0043169~cation binding,GO:0046872~metal ion binding,GO:0046914~transition metal ion binding,	IPR001781:Zinc finger, LIM-type,				SM00132:LIM,	LIM domain,metal-binding,zinc,
ENSG00000083844	zinc finger protein 264	Homo sapiens			General function prediction only,	GO:0006350~transcription,GO:0006355~regulation of transcription, DNA-dependent,GO:0045449~regulation of transcription,GO:0051252~regulation of RNA metabolic process,		GO:0003677~DNA binding,GO:0008270~zinc ion binding,GO:0043167~ion binding,GO:0043169~cation binding,GO:0046872~metal ion binding,GO:0046914~transition metal ion binding,	IPR001909:Krueppel-associated box,IPR007087:Zinc finger, C2H2-type,IPR013087:Zinc finger, C2H2-type/integrase, DNA-binding,IPR015880:Zinc finger, C2H2-like,			PIRSF005559:zinc finger protein ZFP-36,	SM00349:KRAB,SM00355:ZnF_C2H2,	complete proteome,dna-binding,metal-binding,nucleus,phosphoprotein,polymorphism,repeat,Transcription,transcription regulation,zinc,zinc-finger,	chain:Zinc finger protein 264,domain:KRAB,modified residue,sequence variant,zinc finger region:C2H2-type 1,zinc finger region:C2H2-type 10,zinc finger region:C2H2-type 11,zinc finger region:C2H2-type 12,zinc finger region:C2H2-type 13,zinc finger region:C2H2-type 2,zinc finger region:C2H2-type 3,zinc finger region:C2H2-type 4,zinc finger region:C2H2-type 5,zinc finger region:C2H2-type 6,zinc fing…
ENSG00000083817	zinc finger protein 416	Homo sapiens			General function prediction only,Transcription / Cell division and chromosome partitioning,	GO:0006350~transcription,GO:0006355~regulation of transcription, DNA-dependent,GO:0045449~regulation of transcription,GO:0051252~regulation of RNA metabolic process,		GO:0003677~DNA binding,GO:0008270~zinc ion binding,GO:0043167~ion binding,GO:0043169~cation binding,GO:0046872~metal ion binding,GO:0046914~transition metal ion binding,	IPR001909:Krueppel-associated box,IPR007087:Zinc finger, C2H2-type,IPR013087:Zinc finger, C2H2-type/integrase, DNA-binding,IPR015880:Zinc finger, C2H2-like,			PIRSF005559:zinc finger protein ZFP-36,	SM00349:KRAB,SM00355:ZnF_C2H2,	complete proteome,dna-binding,metal-binding,nucleus,repeat,Transcription,transcription regulation,zinc,zinc-finger,	chain:Zinc finger protein 416,domain:KRAB,sequence conflict,zinc finger region:C2H2-type 10,zinc finger region:C2H2-type 11,zinc finger region:C2H2-type 12,zinc finger region:C2H2-type 1; degenerate,zinc finger region:C2H2-type 2,zinc finger region:C2H2-type 3,zinc finger region:C2H2-type 4,zinc finger region:C2H2-type 5,zinc finger region:C2H2-type 6,zinc finger region:C2H2-type 7,zinc finger re…
ENSG00000124459	zinc finger protein 45	Homo sapiens			General function prediction only,	GO:0006350~transcription,GO:0006355~regulation of transcription, DNA-dependent,GO:0045449~regulation of transcription,GO:0051252~regulation of RNA metabolic process,		GO:0003677~DNA binding,GO:0003700~transcription factor activity,GO:0008270~zinc ion binding,GO:0030528~transcription regulator activity,GO:0043167~ion binding,GO:0043169~cation binding,GO:0046872~metal ion binding,GO:0046914~transition metal ion binding,	IPR001909:Krueppel-associated box,IPR007087:Zinc finger, C2H2-type,IPR013087:Zinc finger, C2H2-type/integrase, DNA-binding,IPR015880:Zinc finger, C2H2-like,			PIRSF005559:zinc finger protein ZFP-36,	SM00349:KRAB,SM00355:ZnF_C2H2,	complete proteome,DNA binding,dna-binding,metal-binding,nucleus,polymorphism,repeat,Transcription,transcription regulation,zinc,zinc finger,zinc-finger,	chain:Zinc finger protein 45,domain:KRAB,sequence conflict,sequence variant,zinc finger region:C2H2-type 10,zinc finger region:C2H2-type 11,zinc finger region:C2H2-type 12,zinc finger region:C2H2-type 13,zinc finger region:C2H2-type 14,zinc finger region:C2H2-type 15,zinc finger region:C2H2-type 16,zinc finger region:C2H2-type 17,zinc finger region:C2H2-type 18,zinc finger region:C2H2-type 1; deg…
ENSG00000103199	zinc finger protein 500	Homo sapiens			General function prediction only,	GO:0006350~transcription,GO:0006355~regulation of transcription, DNA-dependent,GO:0045449~regulation of transcription,GO:0051252~regulation of RNA metabolic process,		GO:0003677~DNA binding,GO:0003700~transcription factor activity,GO:0008270~zinc ion binding,GO:0030528~transcription regulator activity,GO:0043167~ion binding,GO:0043169~cation binding,GO:0046872~metal ion binding,GO:0046914~transition metal ion binding,	IPR001909:Krueppel-associated box,IPR003309:Transcriptional regulator SCAN,IPR007087:Zinc finger, C2H2-type,IPR013087:Zinc finger, C2H2-type/integrase, DNA-binding,IPR015880:Zinc finger, C2H2-like,				SM00349:KRAB,SM00355:ZnF_C2H2,SM00431:SCAN,	complete proteome,dna-binding,metal-binding,nucleus,repeat,Transcription,transcription regulation,zinc,zinc-finger,	chain:Zinc finger protein 500,domain:KRAB,domain:SCAN box,zinc finger region:C2H2-type 1,zinc finger region:C2H2-type 2,zinc finger region:C2H2-type 3,zinc finger region:C2H2-type 4,zinc finger region:C2H2-type 5,
ENSG00000213015	zinc finger protein 580	Homo sapiens				GO:0006350~transcription,GO:0045449~regulation of transcription,		GO:0003677~DNA binding,GO:0008270~zinc ion binding,GO:0043167~ion binding,GO:0043169~cation binding,GO:0046872~metal ion binding,GO:0046914~transition metal ion binding,	IPR007087:Zinc finger, C2H2-type,IPR015880:Zinc finger, C2H2-like,				SM00355:ZnF_C2H2,	complete proteome,dna-binding,metal-binding,nucleus,repeat,Transcription,transcription regulation,zinc,zinc-finger,	chain:Zinc finger protein 580,compositionally biased region:Pro-rich,zinc finger region:C2H2-type 1,zinc finger region:C2H2-type 2,zinc finger region:C2H2-type 3,
ENSG00000142684	zinc finger protein 593	Homo sapiens				GO:0000122~negative regulation of transcription from RNA polymerase II promoter,GO:0006350~transcription,GO:0006355~regulation of transcription, DNA-dependent,GO:0006357~regulation of transcription from RNA polymerase II promoter,GO:0009890~negative regulation of biosynthetic process,GO:0010558~negative regulation of macromolecule biosynthetic process,GO:0010605~negative regulation of macromolecu…	GO:0005730~nucleolus,GO:0031974~membrane-enclosed lumen,GO:0031981~nuclear lumen,GO:0043228~non-membrane-bounded organelle,GO:0043232~intracellular non-membrane-bounded organelle,GO:0043233~organelle lumen,GO:0070013~intracellular organelle lumen,	GO:0003677~DNA binding,GO:0003712~transcription cofactor activity,GO:0003714~transcription corepressor activity,GO:0008134~transcription factor binding,GO:0008270~zinc ion binding,GO:0016564~transcription repressor activity,GO:0030528~transcription regulator activity,GO:0043167~ion binding,GO:0043169~cation binding,GO:0046872~metal ion binding,GO:0046914~transition metal ion binding,	IPR007087:Zinc finger, C2H2-type,IPR015880:Zinc finger, C2H2-like,			PIRSF025831:PIRSF025831,	SM00355:ZnF_C2H2,	3d-structure,complete proteome,dna-binding,metal-binding,nucleus,polymorphism,Transcription,transcription regulation,zinc,zinc-finger,	chain:Zinc finger protein 593,helix,sequence variant,strand,turn,zinc finger region:C2H2-type,
ENSG00000197483	zinc finger protein 628	Homo sapiens			General function prediction only,	GO:0006350~transcription,GO:0006355~regulation of transcription, DNA-dependent,GO:0045449~regulation of transcription,GO:0051252~regulation of RNA metabolic process,		GO:0003677~DNA binding,GO:0003700~transcription factor activity,GO:0008270~zinc ion binding,GO:0030528~transcription regulator activity,GO:0043167~ion binding,GO:0043169~cation binding,GO:0046872~metal ion binding,GO:0046914~transition metal ion binding,	IPR007087:Zinc finger, C2H2-type,IPR013087:Zinc finger, C2H2-type/integrase, DNA-binding,IPR015880:Zinc finger, C2H2-like,				SM00355:ZnF_C2H2,	complete proteome,dna-binding,metal-binding,nucleus,repeat,Transcription,transcription regulation,zinc,zinc-finger,	chain:Zinc finger protein 628,compositionally biased region:Gly-rich,compositionally biased region:Pro-rich,region of interest:4 X approximate tandem repeats,repeat:1,repeat:2,repeat:3,repeat:4,zinc finger region:C2H2-type 1,zinc finger region:C2H2-type 10,zinc finger region:C2H2-type 11,zinc finger region:C2H2-type 12,zinc finger region:C2H2-type 13,zinc finger region:C2H2-type 14,zinc finger re…
ENSG00000185730	zinc finger protein 696	Homo sapiens			General function prediction only,	GO:0006350~transcription,GO:0045449~regulation of transcription,		GO:0003677~DNA binding,GO:0008270~zinc ion binding,GO:0043167~ion binding,GO:0043169~cation binding,GO:0046872~metal ion binding,GO:0046914~transition metal ion binding,	IPR007087:Zinc finger, C2H2-type,IPR013087:Zinc finger, C2H2-type/integrase, DNA-binding,IPR015880:Zinc finger, C2H2-like,				SM00355:ZnF_C2H2,	complete proteome,dna-binding,metal-binding,nucleus,repeat,Transcription,transcription regulation,zinc,zinc-finger,	chain:Zinc finger protein 696,sequence conflict,zinc finger region:C2H2-type 1,zinc finger region:C2H2-type 2,zinc finger region:C2H2-type 3,zinc finger region:C2H2-type 4,zinc finger region:C2H2-type 5,zinc finger region:C2H2-type 6,zinc finger region:C2H2-type 7,zinc finger region:C2H2-type 8,zinc finger region:C2H2-type 9,
ENSG00000142409	zinc finger protein 787	Homo sapiens			General function prediction only,	GO:0006350~transcription,GO:0045449~regulation of transcription,		GO:0003677~DNA binding,GO:0008270~zinc ion binding,GO:0043167~ion binding,GO:0043169~cation binding,GO:0046872~metal ion binding,GO:0046914~transition metal ion binding,	IPR007087:Zinc finger, C2H2-type,IPR013087:Zinc finger, C2H2-type/integrase, DNA-binding,IPR015880:Zinc finger, C2H2-like,				SM00355:ZnF_C2H2,	complete proteome,dna-binding,metal-binding,nucleus,phosphoprotein,polymorphism,repeat,Transcription,transcription regulation,zinc,zinc-finger,	chain:Zinc finger protein 787,compositionally biased region:Ala-rich,compositionally biased region:Pro-rich,modified residue,sequence variant,zinc finger region:C2H2-type 1,zinc finger region:C2H2-type 2,zinc finger region:C2H2-type 3,zinc finger region:C2H2-type 4,zinc finger region:C2H2-type 5,zinc finger region:C2H2-type 6,zinc finger region:C2H2-type 7,
ENSG00000197933	zinc finger protein 823	Homo sapiens			General function prediction only,	GO:0006350~transcription,GO:0006355~regulation of transcription, DNA-dependent,GO:0045449~regulation of transcription,GO:0051252~regulation of RNA metabolic process,		GO:0003677~DNA binding,GO:0008270~zinc ion binding,GO:0043167~ion binding,GO:0043169~cation binding,GO:0046872~metal ion binding,GO:0046914~transition metal ion binding,	IPR001909:Krueppel-associated box,IPR007087:Zinc finger, C2H2-type,IPR013087:Zinc finger, C2H2-type/integrase, DNA-binding,IPR015880:Zinc finger, C2H2-like,			PIRSF005559:zinc finger protein ZFP-36,	SM00349:KRAB,SM00355:ZnF_C2H2,	complete proteome,DNA binding,dna-binding,metal-binding,nucleus,polymorphism,repeat,Transcription,transcription regulation,zinc,zinc finger,zinc-finger,	chain:Zinc finger protein 823,domain:KRAB,sequence variant,zinc finger region:C2H2-type 1,zinc finger region:C2H2-type 10,zinc finger region:C2H2-type 11; atypical,zinc finger region:C2H2-type 12,zinc finger region:C2H2-type 13,zinc finger region:C2H2-type 14,zinc finger region:C2H2-type 15,zinc finger region:C2H2-type 16,zinc finger region:C2H2-type 2,zinc finger region:C2H2-type 3,zinc finger r…
ENSG00000196605	zinc finger protein 846	Homo sapiens			General function prediction only,	GO:0006350~transcription,GO:0006355~regulation of transcription, DNA-dependent,GO:0045449~regulation of transcription,GO:0051252~regulation of RNA metabolic process,		GO:0003677~DNA binding,GO:0008270~zinc ion binding,GO:0043167~ion binding,GO:0043169~cation binding,GO:0046872~metal ion binding,GO:0046914~transition metal ion binding,	IPR001909:Krueppel-associated box,IPR007087:Zinc finger, C2H2-type,IPR013087:Zinc finger, C2H2-type/integrase, DNA-binding,IPR015880:Zinc finger, C2H2-like,				SM00349:KRAB,SM00355:ZnF_C2H2,	alternative splicing,complete proteome,dna-binding,metal-binding,nucleus,phosphoprotein,polymorphism,repeat,Transcription,transcription regulation,zinc,zinc-finger,	chain:Zinc finger protein 846,domain:KRAB,modified residue,sequence variant,splice variant,zinc finger region:C2H2-type 10,zinc finger region:C2H2-type 11,zinc finger region:C2H2-type 12,zinc finger region:C2H2-type 13,zinc finger region:C2H2-type 14; degenerate,zinc finger region:C2H2-type 1; degenerate,zinc finger region:C2H2-type 2; degenerate,zinc finger region:C2H2-type 3,zinc finger region:…
ENSG00000153786	zinc finger, DHHC-type containing 7	Homo sapiens					GO:0016021~integral to membrane,GO:0031224~intrinsic to membrane,	GO:0008270~zinc ion binding,GO:0043167~ion binding,GO:0043169~cation binding,GO:0046872~metal ion binding,GO:0046914~transition metal ion binding,	IPR001594:Zinc finger, DHHC-type,		Many sequence variants affecting diversity of adult human height,	PIRSF037459:zinc finger DHHC domain-containing protein 7,		Acyltransferase,alternative splicing,complete proteome,membrane,metal-binding,polymorphism,transferase,transmembrane,zinc,zinc-finger,	chain:Palmitoyltransferase ZDHHC7,sequence conflict,sequence variant,splice variant,transmembrane region,zinc finger region:DHHC-type,
ENSG00000072121	zinc finger, FYVE domain containing 26	Homo sapiens				GO:0008219~cell death,GO:0016265~death,		GO:0008270~zinc ion binding,GO:0043167~ion binding,GO:0043169~cation binding,GO:0046872~metal ion binding,GO:0046914~transition metal ion binding,	IPR000306:Zinc finger, FYVE-type,IPR017455:Zinc finger, FYVE-related,		Spastic paraplegia 15,		SM00064:FYVE,	alternative splicing,coiled coil,complete proteome,hereditary spastic paraplegia,metal-binding,neurodegeneration,phosphoprotein,polymorphism,zinc,zinc-finger,	chain:Zinc finger FYVE domain-containing protein 26,modified residue,sequence conflict,sequence variant,splice variant,zinc finger region:FYVE-type,
ENSG00000015171	zinc finger, MYND domain containing 11	Homo sapiens				GO:0000122~negative regulation of transcription from RNA polymerase II promoter,GO:0006350~transcription,GO:0006355~regulation of transcription, DNA-dependent,GO:0006357~regulation of transcription from RNA polymerase II promoter,GO:0007049~cell cycle,GO:0008283~cell proliferation,GO:0009890~negative regulation of biosynthetic process,GO:0010558~negative regulation of macromolecule biosynthetic p…		GO:0003677~DNA binding,GO:0008270~zinc ion binding,GO:0043167~ion binding,GO:0043169~cation binding,GO:0046872~metal ion binding,GO:0046914~transition metal ion binding,	IPR000313:PWWP,IPR001487:Bromodomain,IPR001841:Zinc finger, RING-type,IPR001965:Zinc finger, PHD-type,IPR002893:Zinc finger, MYND-type,IPR019786:Zinc finger, PHD-type, conserved site,IPR019787:Zinc finger, PHD-finger,				SM00184:RING,SM00249:PHD,SM00293:PWWP,SM00297:BROMO,	bromodomain,cell cycle,complete proteome,dna-binding,metal-binding,nucleus,phosphoprotein,repressor,Transcription,transcription regulation,zinc,zinc-finger,	chain:Zinc finger MYND domain-containing protein 11,domain:Bromo,domain:PWWP,modified residue,region of interest:Required for binding to E1A,short sequence motif:Nuclear localization signal,zinc finger region:MYND-type,zinc finger region:PHD-type,
