# Supplementary material for: Distal CpG islands can serve as alternative promoters to transcribe genes with silenced proximal promoters
Source: HighWire-hosted journal article supplement (doi:10.1101/gr.212050.116), 2017-02-21
Supplement: Supplemental_Table_S6.xlsx [file Supplemental_Table_S6.xlsx]

## Sheet: Sheet1
Supplementary Table 6. Fraction of tested MethExp loci per cell type that show strong evidence of alternative promoter usage based on stringent thresholds of: 1) CGI Fractional Methylation - to exclude CGIs that are heavily methylated and potentially silenced, we counted only those with methylation less than the mean methylation level of the intermediately methylated subpopulation identified from…
Tissue	CGI Fractional Methylation	CGI CAGE tag level	PolII-Ser5 signal	Segment RNAseq signal strength	Segment RNAseq read coverage
E003	0.6	1	NA	0.7727	0.7727
E004	0.58	1	NA	0.75	0.77
E005	0.5405	1	NA	0.7094	0.7162
E006	0.5106	1	NA	0.7553	0.734
E007	0.6091	1	NA	0.7727	0.7545
E011	0.7561	1	NA	0.7804	0.7804
E012	0.5426	1	NA	0.7596	0.7596
E013	0.5702	1	NA	0.719	0.719
E016	0.5688	1	NA	0.7614	0.7431
E024	0.6	1	NA	0.8083	0.8
E053	0.6606	1	NA	0.8532	0.8532
E054	0.614	1	NA	0.8157	0.8157
E058	0.6875	1	NA	0.7875	0.7875
E065	0.4674	1	NA	0.6673	0.6728
E066	0.5517	1	NA	0.6812	0.6812
E070	0.5676	1	NA	0.7657	0.7657
E071	0.5714	1	NA	0.6904	0.6904
E079	0.4852	1	NA	0.7396	0.7337
E094	0.5276	1	NA	0.6398	0.6521
E095	0.5714	1	NA	0.6857	0.7
E096	0.538	1	NA	0.7173	0.7228
E097	0.614	1	NA	0.728	0.728
E098	0.4574	1	NA	0.7606	0.7712
E100	0.5941	1	NA	0.7722	0.7722
E104	0.6692	1	NA	0.7368	0.7218
E105	0.5887	1	NA	0.7021	0.6879
E106	0.7265	1	NA	0.6502	0.6547
E109	0.5045	1	NA	0.6818	0.6909
E112	0.5069	1	NA	0.6451	0.6221
E113	0.5102	1	NA	0.6836	0.7091
HepG2	0.5402	1	NA	0.6842	0.6821
K562	0.675	1	NA	0.768	0.765
IMR90	0.5069	1	NA	0.6637	0.662
MCF7	0.541	1	0.6782	0.6382	0.6541
